# Supplementary material for: Self-reported health without clinically measurable benefits among adult users of multivitamin and multimineral supplements: a cross-sectional study
Source: PubMed Central journal article supplement — BMJ Open. 2020 Nov 4;10(11):e039119. doi: 10.1136/bmjopen-2020-039119 (PMC7643504; doi:10.1136/bmjopen-2020-039119), 2020-11-04
Supplement: bmjopen-2020-039119.draft_revisions.pdf [file bmjopen-2020-039119.draft_revisions.pdf]

# BMJ Open

BMJ Open is committed to open peer review. As part of this commitment we make the peer review history of every article we publish publicly available.

When an article is published we post the peer reviewers' comments and the authors' responses online. We also post the versions of the paper that were used during peer review. These are the versions that the peer review comments apply to.

The versions of the paper that follow are the versions that were submitted during the peer review process. They are not the versions of record or the final published versions. They should not be cited or distributed as the published version of this manuscript.

BMJ Open is an open access journal and the full, final, typeset and author-corrected version of record of the manuscript is available on our site with no access controls, subscription charges or pay-per-view fees (<http://bmjopen.bmj.com>).

If you have any questions on BMJ Open's open peer review process please email [info.bmjopen@bmj.com](mailto:info.bmjopen@bmj.com)

# BMJ Open

## Self-reported health without clinically measurable benefits among adult users of multivitamin and multiminerall supplements: a cross-sectional study

|                               |                                                                                                                                                                                                                                                                                                                                                                                                                                                                                                                                                                                                                                                                                                                                                                                                                                                                                                                                                                                                                                                                                                                                                                                                                                                                                                                                                                                                                                                                                                                                                                                                                                                                                                                                                                                                       |
|-------------------------------|-------------------------------------------------------------------------------------------------------------------------------------------------------------------------------------------------------------------------------------------------------------------------------------------------------------------------------------------------------------------------------------------------------------------------------------------------------------------------------------------------------------------------------------------------------------------------------------------------------------------------------------------------------------------------------------------------------------------------------------------------------------------------------------------------------------------------------------------------------------------------------------------------------------------------------------------------------------------------------------------------------------------------------------------------------------------------------------------------------------------------------------------------------------------------------------------------------------------------------------------------------------------------------------------------------------------------------------------------------------------------------------------------------------------------------------------------------------------------------------------------------------------------------------------------------------------------------------------------------------------------------------------------------------------------------------------------------------------------------------------------------------------------------------------------------|
| Journal:                      | <i>BMJ Open</i>                                                                                                                                                                                                                                                                                                                                                                                                                                                                                                                                                                                                                                                                                                                                                                                                                                                                                                                                                                                                                                                                                                                                                                                                                                                                                                                                                                                                                                                                                                                                                                                                                                                                                                                                                                                       |
| Manuscript ID                 | bmjopen-2020-039119                                                                                                                                                                                                                                                                                                                                                                                                                                                                                                                                                                                                                                                                                                                                                                                                                                                                                                                                                                                                                                                                                                                                                                                                                                                                                                                                                                                                                                                                                                                                                                                                                                                                                                                                                                                   |
| Article Type:                 | Original research                                                                                                                                                                                                                                                                                                                                                                                                                                                                                                                                                                                                                                                                                                                                                                                                                                                                                                                                                                                                                                                                                                                                                                                                                                                                                                                                                                                                                                                                                                                                                                                                                                                                                                                                                                                     |
| Date Submitted by the Author: | 06-Apr-2020                                                                                                                                                                                                                                                                                                                                                                                                                                                                                                                                                                                                                                                                                                                                                                                                                                                                                                                                                                                                                                                                                                                                                                                                                                                                                                                                                                                                                                                                                                                                                                                                                                                                                                                                                                                           |
| Complete List of Authors:     | <p>Paranjpe, Manish; Harvard Medical School, Health Sciences and Technology Program</p> <p>Chin, Alfred; Weill Cornell Medical College, Weill Cornell/Rockefeller/Sloan Kettering Tri-Institutional MD-PhD Program</p> <p>Paranjpe, Ishan; Mount Sinai School of Medicine, Charles Bronfman Institute for Personalized Medicine</p> <p>Duy, Phan; Yale University School of Medicine, Medical Scientist Training Program</p> <p>Wang, Jason; Harvard Medical School, Health Sciences and Technology Program</p> <p>O'Hagan, Ross; Mount Sinai School of Medicine, Charles Bronfman Institute for Personalized Medicine</p> <p>Reid, Nicholas; Harvard Medical School</p> <p>Arzani, Artine ; Weill Cornell Medical College</p> <p>Haghdel, Arsalan ; Weill Cornell Medical College</p> <p>Lim, Clarence; Texas A&amp;M University System Health Science Center College of Medicine</p> <p>Orhurhu, Vwaire ; Harvard Medical School, Department of Anesthesia, Critical Care and Pain MedicineBeth Israel Deaconess Medical Center; Harvard Medical School</p> <p>Urits, Ivan; Massachusetts General Hospital, Department of Anesthesia, Critical Care and Pain Medicine; Harvard Medical School</p> <p>Ngo, Anh; Beth Israel Deaconess Medical Center, Department of Anesthesia, Critical Care, and Pain Medicine; Harvard Medical School</p> <p>Glicksberg, Benjamin; Mount Sinai School of Medicine, Charles Bronfman Institute for Personalized Medicine</p> <p>Hall, Kathryn; Brigham and Women's Hospital, Division of Preventive Medicine; Beth Israel Deaconess Medical Center, Program in Placebo Studies</p> <p>Mehta, Darshan ; Massachusetts General Hospital,</p> <p>Nadkarni, GN ; Icahn School of Medicine at Mount Sinai,</p> <p>Cooper, Richard; Loyola University Medical Center</p> |
| Keywords:                     | COMPLEMENTARY MEDICINE, NUTRITION & DIETETICS, GENERAL MEDICINE (see Internal Medicine)                                                                                                                                                                                                                                                                                                                                                                                                                                                                                                                                                                                                                                                                                                                                                                                                                                                                                                                                                                                                                                                                                                                                                                                                                                                                                                                                                                                                                                                                                                                                                                                                                                                                                                               |
|                               |                                                                                                                                                                                                                                                                                                                                                                                                                                                                                                                                                                                                                                                                                                                                                                                                                                                                                                                                                                                                                                                                                                                                                                                                                                                                                                                                                                                                                                                                                                                                                                                                                                                                                                                                                                                                       |

1  
2  
3  
4  
5  
6  
7  
8  
9  
10  
11  
12  
13  
14  
15  
16  
17  
18  
19  
20  
21  
22  
23  
24  
25  
26  
27  
28  
29  
30  
31  
32  
33  
34  
35  
36  
37  
38  
39  
40  
41  
42  
43  
44  
45  
46  
47  
48  
49  
50  
51  
52  
53  
54  
55  
56  
57  
58  
59  
60

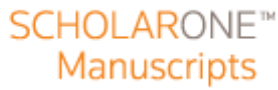

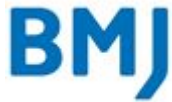

I, the Submitting Author has the right to grant and does grant on behalf of all authors of the Work (as defined in the below author licence), an exclusive licence and/or a non-exclusive licence for contributions from authors who are: i) UK Crown employees; ii) where BMJ has agreed a CC-BY licence shall apply, and/or iii) in accordance with the terms applicable for US Federal Government officers or employees acting as part of their official duties; on a worldwide, perpetual, irrevocable, royalty-free basis to BMJ Publishing Group Ltd ("BMJ") its licensees and where the relevant Journal is co-owned by BMJ to the co-owners of the Journal, to publish the Work in this journal and any other BMJ products and to exploit all rights, as set out in our [licence](#).

The Submitting Author accepts and understands that any supply made under these terms is made by BMJ to the Submitting Author unless you are acting as an employee on behalf of your employer or a postgraduate student of an affiliated institution which is paying any applicable article publishing charge ("APC") for Open Access articles. Where the Submitting Author wishes to make the Work available on an Open Access basis (and intends to pay the relevant APC), the terms of reuse of such Open Access shall be governed by a Creative Commons licence – details of these licences and which [Creative Commons](#) licence will apply to this Work are set out in our licence referred to above.

Other than as permitted in any relevant BMJ Author's Self Archiving Policies, I confirm this Work has not been accepted for publication elsewhere, is not being considered for publication elsewhere and does not duplicate material already published. I confirm all authors consent to publication of this Work and authorise the granting of this licence.

## Self-reported health without clinically measurable benefits among adult users of multivitamin and multimineral supplements: a cross-sectional study

Manish D. Paranjpe<sup>1+</sup>; Alfred C. Chin<sup>2+</sup>; Ishan Paranjpe<sup>3</sup>; Phan Q. Duy<sup>4</sup>; Jason K. Wang<sup>1</sup>; Ross O'Hagan<sup>3</sup>; Nicholas J. Reid<sup>5</sup>; Artine Arzani<sup>6</sup>; Arsalan Haghdel<sup>6</sup>; Clarence C. Lim<sup>7</sup>; Vwaire Orhurhu<sup>5,8</sup>; Ivan Urits<sup>5,8</sup>; Anh L. Ngo<sup>5,9</sup>; Benjamin S. Glicksberg<sup>3</sup>; Kathryn T. Hall<sup>10,11</sup>; Darshan H. Mehta<sup>12,13</sup>; Girish N. Nadkarni<sup>3\*</sup>; Richard S. Cooper<sup>14</sup>

1. Harvard-MIT Program in Health Sciences and Technology, Harvard Medical School, Boston, MA
2. Weill Cornell/Rockefeller/Sloan Kettering Tri-Institutional MD-PhD Program, New York, NY
3. Charles Bronfman Institute for Personalized Medicine, Icahn School of Medicine at Mount Sinai, New York, NY
4. Medical Scientist Training Program, Yale University School of Medicine, New Haven, CT
5. Harvard Medical School, Boston, MA
6. Weill Cornell Medical College, New York, NY
7. Texas A&M Health Science Center College of Medicine, College Station, TX
8. Department of Anesthesia, Critical Care and Pain Medicine, Massachusetts General Hospital, Boston, MA
9. Department of Anesthesia, Critical Care, and Pain Medicine, Beth Israel Deaconess Medical Center, Boston, MA
10. Division of Preventive Medicine, Brigham and Women's Hospital, Boston, MA
11. Program in Placebo Studies, Beth Israel Deaconess Medical Center, Boston, MA
12. Osher Center for Integrative Medicine, Brigham & Women's Hospital, and Harvard Medical School, Boston, MA
13. Benson-Henry Institute for Mind Body Medicine, Massachusetts General Hospital, Boston, MA
14. Loyola University Medical Center, Chicago, IL

+ These authors contributed equally to the study

\* To whom correspondence should be addressed

**Corresponding author:** Manish D. Paranjpe, Harvard-MIT Health Sciences and Technology Program, Harvard Medical School, 25 Shattuck Street, Boston MA, 02115  
(manish\_paranjpe@hms.harvard.edu)

**Word Count:** 2665

## ABSTRACT

**Objectives:** Multiple clinical trials fail to identify clinically measurable health benefits of daily multivitamin and multi-mineral (MVM) consumption in the general adult population.

Understanding the determinants of widespread use of MVMs may guide efforts to better educate the public about effective nutritional practices. To compare self-reported and clinically measurable health outcomes among MVM users and non-users in a large, nationally representative sample of adult civilian non-institutionalized population of the US surveyed on the use of complementary health practices.

**Design:** Cross-sectional analysis of the effect of MVM consumption on self-reported overall health and clinically measurable health outcomes.

**Participants:** Adult MVM users and non-users from the 2012 National Health Interview Survey (n=21,603).

**Primary and secondary outcome measures:** Five psychological, physical, and functional health outcomes 1) self-rated health status, 2) needing help with routine needs, 3) history of 10 chronic diseases, 4) presence of 19 health conditions in the past 12 months, and 5) Kessler 6-Item (K6) Psychological Distress Scale to measure nonspecific psychological distress in the past month.

**Results:** Among 4,933 adult MVM users and 16,670 adult non-users, MVM users self-reported 30% better overall health than non-users (Adjusted OR: 1.31; 95% CI: 1.17-1.46 FDR-adjusted  $P < .001$ ). There were no differences between MVM users and non-users in history of 10 chronic diseases, number of present health conditions, severity of current psychological distress on the

1  
2  
3 K6 scale and rates of needing help with daily activities. No effect modification was observed  
4  
5 after stratification by sex, education, and race.  
6

7 **Conclusions:** MVM users self-reported better overall health despite no apparent differences in  
8  
9 clinically measurable health outcomes. These results suggest that widespread use of non-  
10  
11 prescription multivitamins in adults may be a result of individuals' positive expectation that  
12  
13 multivitamin use leads to better health outcomes or a self-selection bias in which MVM users  
14  
15 intrinsically harbor more positive views regarding their health.  
16  
17  
18  
19

## 20 **STRENGTHS AND LIMITATIONS OF THE STUDY**

- 21 - This is the first study to link increased self-reported health, absence of clinically  
22  
23 measurable benefits, and multivitamin and multimineral supplement use in the same  
24  
25 population  
26  
27
- 28 - Data are derived from a large, national survey across the US  
29
- 30 - Results have broad implications for public health and the multibillion-dollar supplement  
31  
32 industry  
33  
34
- 35 - Cross-sectional study design precludes the demonstration of a causal relationship  
36  
37 between self-reported health and multivitamin and multimineral supplements  
38  
39
- 40 - Self-reported health can be inherently biased and confounding  
41  
42  
43  
44  
45  
46  
47  
48  
49  
50  
51  
52  
53  
54  
55  
56  
57  
58  
59  
60

## INTRODUCTION

Consumption of multivitamins (MVs) and multi-minerals (MMs) (together: MVMs) as dietary supplements is widespread in the general US adult population, with some reports estimating 33% of Americans regularly take MVMs<sup>1-4</sup>. While MVM supplementation is warranted for some individuals at high-risk because of disease-related deficiency<sup>5</sup>, the consumption of non-prescription, over-the-counter MVMs has not produced robust evidence for the wide-ranging health benefits expected by the general adult population. Likewise, large randomized clinical trials that evaluate MVM at different doses, across both men and women at varied ages, have failed to demonstrate benefit in prevention of chronic diseases. The Physicians' Health Study II (PHS II), a randomized placebo-controlled clinical trial of low-dose daily MV use in older male physicians, found no reduction in major CVD events, myocardial infarction, stroke, and CVD mortality<sup>6</sup>, and these results were independent of baseline nutritional status<sup>7</sup>. A prospective cohort study of middle-aged and elderly women also indicated no effect of MV use for the same CVD outcomes in PHS II<sup>8</sup>. The SU.VI.MAX Study, a clinical trial of antioxidative MVMs in adults, found no effect on incidence of ischemic CVD<sup>9</sup>, and high-dose MVMs did not reduce CVD events<sup>10</sup>. Meta-analysis of these and other studies (N=18) found no improvement in CVD outcomes in the general population<sup>11</sup>. Based on these studies, the US Preventative Services Task Force does not recommend MVM use for the prevention of CVD<sup>12,13</sup>.

Data on the effect of MVM consumption on cognitive function in adults are also inconclusive. While results from PHS II found that long-term use of daily MVs did not provide cognitive benefits in men<sup>14</sup>, a meta-analysis on 10 studies concluded that MVs selectively enhanced free recall memory but no other cognitive functions<sup>15</sup>. Intriguingly, nine weeks of MVM use appears to improve multi-tasking and cognitive function during fatigue in women<sup>16</sup>.



1  
2  
3 With regard to cancer, PHS II demonstrated moderately reduced all-cancer risk in men  
4 consuming MVs<sup>17</sup> while data from the Women's Health Initiative Clinical Trials revealed no  
5 association<sup>18</sup>. Some studies even link MVM use with increased cancer risk – a prospective cohort  
6 study of Swedish women found increased breast cancer risk associated with MV use<sup>19</sup>.  
7  
8  
9

10  
11  
12 The association of MVM use with all-cause mortality, like CVD, is null. While data from  
13 the Multiethnic Cohort Study cohort study indicated no association between MV use and all-  
14 cause mortality,<sup>20</sup> the Cancer Prevention Study (II) reported a five percent higher rate of all-  
15 cause death among men using MVs<sup>21</sup> and The Iowa Women's Health Study identified an  
16 association between MVM use and increased total mortality risk<sup>22</sup>. A meta-analysis of these and  
17 other randomized trials (N=21) demonstrated no effect of MVM use on mortality risk<sup>23</sup>.  
18  
19  
20  
21  
22  
23  
24  
25

26 While numerous reports on MVM consumption establish the lack of broad-spectrum,  
27 clinically measurable health benefits, the determinants of widespread MVM use by the general  
28 population are not well understood. Because nutritional supplements constitute a multibillion-  
29 dollar industry, understanding the determinants of widespread MVM use has significant medical  
30 and financial consequences. Moreover, it is unclear whether MVM users, despite not being  
31 physiologically different from non-users, simply believe they are healthier. To address this  
32 question, we utilized data from the 2012 National Health Interview Survey<sup>24</sup> (NHIS), which  
33 included a complementary and alternative (CAM) questionnaire comprising of 21,603  
34 participants across the US.  
35  
36  
37  
38  
39  
40  
41  
42  
43  
44  
45  
46  
47  
48  
49  
50  
51  
52  
53  
54  
55  
56  
57  
58  
59  
60

## METHODS

### Data source

All data was obtained from the 2012 The National Health Interview Survey (NHIS), a nationally representative health survey conducted annually among civilian and noninstitutionalized US participants by the Centers for Disease Control (CDC). All data was publicly available and did not require institutional review board approval. The 2012 NHIS was comprised of a core questionnaire on health information administered to each selected household member. A randomly selected adult in each household was administered a more detailed health survey which included questions on access to care, specific health conditions and use of CAM(2012 only). In 2012, 77.6% of households completed the survey and 79.7% of adults selected completed the detailed survey<sup>24</sup>.

### Health Status and Health Outcome Measures

We obtained data on adults (age  $\geq 18$  years) derived from the Sample Adult Component who also participated in the Adult CAM File. This file surveys use of alternative medicines and therapies including daily MVM consumption, yoga, and meditation. Consistent with previous NHIS studies<sup>25</sup>, we considered five psychological, physical, and functional health outcomes from questions in the Sample Adult Component: 1) self-rated health status (poor/fair vs. excellent/very good/good), 2) needing help with routine needs such as eating (yes or no), 3) history of ten chronic diseases (cancer, hypertension, coronary heart disease, stroke, chronic obstructive pulmonary disease, asthma, diabetes, arthritis, hepatitis, and weak/failing kidneys), 4) presence of 19 health conditions in the past 12 months (digestive, skin, and other allergy, acid reflux, hay fever, chest cold, nausea and vomiting, sore throat, infectious disease, recurring headache,

1  
2  
3 memory loss, neurological problems, sprains, and abdominal, dental, muscle/bone, chronic, and  
4 skin pain), and 5) Kessler 6-Item (K6) Psychological Distress Scale<sup>26</sup> score to measure  
5  
6 nonspecific psychological distress in the past month. Participants who refused to answer or did  
7  
8 not know the answers to at least one of these questions were excluded from the study.  
9

10  
11  
12 Participants were classified as MVM users or non-users from their response to the question  
13  
14 “During the past 12 months, did take multi-vitamins or multi-minerals?” in the Adult CAM File.  
15  
16 Participants who refused to answer or did not know their MVM use in the past 12 months were  
17  
18 excluded from analyses.  
19  
20  
21  
22  
23

## 24 **Statistical Analysis**

25  
26 For each outcome, the relationship between MVM use in the past year and health  
27  
28 outcome was estimated using a logistic regression model adjusting for age, sex, race, region,  
29  
30 education, income, employment status, health insurance status, presence of child in household,  
31  
32 marital status, unmet medical care due to cost in the past year, and not seeing a health  
33  
34 professional in office in the past two weeks. Multinomial logistic regression was used for  
35  
36 outcomes with more than two levels (e.g., number of chronic diseases, number of diseases in the  
37  
38 past 12 months, Kessler-6 Item score). Binary logistic regression was used for outcomes with  
39  
40 two levels (self-reported health and needing help with daily routines such as eating). Standard  
41  
42 errors were estimated using weights provided by NHIS to account for the complex survey design  
43  
44 and produce nationally representative estimates. A multiple imputation strategy was used to  
45  
46 estimate income in cases of missing responses to income as recommended by National Center for  
47  
48 Health Statistics<sup>27</sup>. All analyses were conducted using R (v3.5.1). *P* values were adjusted for  
49  
50  
51  
52  
53  
54  
55  
56  
57  
58  
59  
60

1  
2  
3 multiple comparisons using a Benjamini-Hochberg procedure with  $FDR < 0.01$  deemed  
4  
5 significant.  
6

7  
8 Stratified analyses were conducted in age- (18-44 years, 45-64 years and 65+ years),  
9  
10 race- (white and non-white), sex- (female and male), family income- (<100%, 100%-199%,  
11  
12 200%-299%, 300-399%, and 400% relative to the federal poverty level), education level- (did  
13  
14 not graduate high school, high school graduate, college graduate or higher) to assess the effect of  
15  
16 MVM use on self-reported health in sociodemographic subgroups. In addition to stratified  
17  
18 analyses, statistical interaction effects between MVM use and demographic variable (age, race,  
19  
20 sex, family income, and education) on self-reported health was assessed using a multivariate  
21  
22 regression model.  
23  
24  
25  
26  
27

## 28 **Patients and Public Involvement**

29  
30  
31 Patients and the public were not involved in this study, including data collection, analysis and  
32  
33 interpretation.  
34  
35  
36

## 37 **RESULTS**

### 38 **Study Cohort Characteristics**

39  
40  
41 Sociodemographic differences between MVM users and non-users are presented in Table  
42  
43  
44 1. Our study included 4,933 MVM users and 16,670 non-users (Table 1). As previously reported  
45  
46 in data from the 2007-2010 and 2010-2014 National Health and Nutrition Examination Surveys  
47  
48 (NHANES)<sup>28,29</sup>, compared to non-users, MVM users were significantly older, earned more  
49  
50 income, more likely to be female, more likely to be a college graduate, more likely to be married,  
51  
52 more likely to have health insurance. Unlike in previous studies, compared to MVM non-users,  
53  
54  
55  
56  
57  
58  
59

1  
2  
3 MVM users were less likely to be unemployed, have a minor child in their household, and not  
4 have an office visit for healthcare in the past two weeks (Table 1). We observed no significant  
5 differences in percent of non-English speaking interviews and percent having foregone medical  
6 care due to cost in the past year between MVM users and non-users (Table 1).  
7  
8  
9  
10  
11

### 12 **Effect of MVM usage on Health Status and Health Outcomes**

13  
14 Differences in health status and health outcomes between MVM users and non-users are  
15 displayed in Table 2. Multivariate regression revealed that MVM users self-reported 30% better  
16 overall health than non-users (OR: 1.31; 95% CI: 1.17-1.46 FDR-adjusted  $P < .001$  ; Table 2).  
17  
18 Strikingly, MVM users and non-users did not differ in history of 10 chronic disease (MVM users  
19 mean 1.09 conditions; 95% CI: 1.06-1.11 vs non-users mean: 1.07; 95% CI: 1.03-1.11) number  
20 of present health conditions (MVM users mean: 2.7 conditions; 95% CI: 2.7-2.8 vs non-users  
21 mean: 2.8; 95% CI: 2.7-2.9), severity of psychological distress on the K6 scale (MVM users  
22 mean K6 score = 2.3; 95% CI: 2.3-2.4 vs non-users mean = 2.5; 95% CI: 2.4-2.6), and needing  
23 help with daily activities (OR: 0.86; 95% CI: 0.71-1.04).  
24  
25  
26  
27  
28  
29  
30  
31  
32  
33  
34  
35  
36  
37

### 38 **Stratified Analyses: Effect of MVM Usage on Self-Reported Overall Health in** 39 **Sociodemographic Subgroups**

40  
41 Table 3 reports the effect of MVM usage on self-reported overall health in age, race, sex,  
42 income, and education-stratified subgroups (Table 3). MVM use was associated with better self-  
43 reported health in the 18-44-year (OR: 1.26; 95% CI: 1.00-1.61) and 45-64-year groups (OR:  
44 1.30; 95% CI: 1.08-1.57) and near significant among respondents  $\geq 65$  years (OR: 1.20; 95% CI:  
45 0.95-1.52; FDR  $P$  value = 0.06) (Table 3). MVM use was associated with better self-reported  
46 health amongst both white (OR: 1.34; 95% CI: 1.07-1.67) and non-white (OR: 1.26; 95% CI:  
47  
48  
49  
50  
51  
52  
53  
54  
55  
56  
57  
58  
59  
60

1  
2  
3 1.09-1.45) respondents (Table 3). MVM use was associated with better self-reported health in  
4  
5 both male (OR: 1.33; 95% CI: 1.10-1.63) and female (OR: 1.22; 95% CI: 1.05-1.41) respondents  
6  
7 (Table 3). Interestingly, MVM use was associated with better self-reported health in families  
8  
9 with income < 100% of the federal poverty level (FPL) (OR: 1.42; 95% CI: 1.12-1.80), 100%-  
10  
11 199% FPL (OR: 1.37; 95% CI: 1.10-1.69) and 200%-299% FPL (OR: 1.32; 95% CI: 1.01-1.72)  
12  
13 but not in families whose income was 300%-399% FPL (OR: 1.32; 95% CI: 0.88-1.98) or  
14  
15  $\geq$ 400% FPL (OR: 1.15; 95% CI: 0.85-1.56) (Table 3). MVM use was associated with better self-  
16  
17 reported health in all education subgroups analyzed, including respondents that did not complete  
18  
19 high school (OR: 1.38; 95% CI: 1.06-1.81), high school graduates (OR: 1.21; 95% CI: 1.04-  
20  
21 1.41), and college graduates (OR: 1.37; 95% CI: 1.00-1.88) (Table 3). All stratified analyses  
22  
23 were conducted after adjusting for the potential confounding effects of age, sex, race, region,  
24  
25 education, income, employment status, health insurance status, presence of child in household,  
26  
27 marital status, unmet medical care due to cost in the past year, and not seeing a health  
28  
29 professional in office in the past two weeks. The variable of stratification was not included as a  
30  
31 covariate.  
32  
33  
34  
35  
36

37  
38 Statistical interaction effects between MVM use and demographic variables (age, race,  
39  
40 family income, and education) on self-reported overall health was assessed through a  
41  
42 multivariate regression model in Table S1. We observed no significant effect between MVM use  
43  
44 and age, MVM use and race, MVM use and family income, and MVM use and education on self-  
45  
46 reported overall income (Table S1).  
47  
48  
49  
50  
51  
52  
53  
54  
55  
56  
57  
58  
59  
60

## DISCUSSION

This present study is the first to simultaneously analyze the association between MVM use and both self-reported health and clinical health outcomes. In this work, we found that MVM users self-report 30% better overall health than non-users despite any clinically assessed differences in health. Our finding that MVM users and non-users do not differ in various psychological, physical, and functional outcomes corroborates previous reports that MVMs do not improve overall health in the general adult population<sup>5-22</sup>. Our stratified analysis revealed that MVM use is associated with better self-reported overall health across all race, sex, and education groups, and in individuals under 65 and with family incomes below 300% FPL. The lack of association between MVM usage and self-reported health in individuals with family income greater than 300% FPL may be related to sample size and should be replicated in a larger cohort. Taken together, these findings help elucidate explanations underlying widespread MVM usage despite no generalized clinical benefits.

The results here suggest two potential explanations underlying widespread MVM consumption in the absence of clinically measurable benefits: 1) MVM users believe in the efficacy of MVMs by harboring a positive expectation regarding the health benefits of MVMs and/or 2) MVM users intrinsically harbor a more positive outlook on their personal health regardless of MVM usage. A growing body of evidence suggests that positive expectation influence treatment outcomes for diseases including heart disease<sup>30-33</sup>, cancer<sup>34,35</sup>, musculoskeletal disorders<sup>36,37</sup>, injuries<sup>38,39</sup>, and obesity<sup>40-42</sup>. Under a positive expectation model, MVM users are more likely to harbor a positive expectation regarding the clinical efficacy of MVMs and thus more likely to self-report as having excellent or good overall health. In the case of MVM usage, it is interesting the presence of positive expectation did not influence clinically

1  
2  
3 measurable health outcomes, unlike in other treatments. The effect of positive expectations in  
4  
5 the MVM user community is made even more stronger when one considers that the majority of  
6  
7 MVM and supplements are sold to the so-called “worried-well” population<sup>43</sup> who may assign  
8  
9 greater weight to the purported health benefits of dietary supplements and alternative therapies. It  
10  
11 is possible that members of this population are more susceptible to positive expectations and may  
12  
13 thereby continue to use MVMs in the absence of clinical benefits.  
14  
15

16  
17 The second mechanism, in which MVM users intrinsically harbor greater positive views  
18  
19 about their health, may be explained in part by certain combinations of sociodemographic  
20  
21 determinants that influence self-reported health. While age, sex, income, education, and location  
22  
23 of residence have been previously shown to affect self-reported health in diverse populations<sup>44–</sup>  
24  
25 <sup>46</sup>, combinations of other characteristics may also cause MVM users to harbor intrinsically more  
26  
27 positive views regarding their health in the absence of clinical differences. Further research is  
28  
29 necessary to elucidate these characteristics.  
30  
31

32  
33 Our results are consistent with existing work from two studies: the first being a 2013  
34  
35 study involving 11,956 adults from the 2007-2010 NHANES that demonstrated MVM users  
36  
37 exhibit greater self-reported health than non-users<sup>29</sup>, and second, a 2014 study involving 5536  
38  
39 Coast Guard and military study which found that MVM users were significantly more likely to  
40  
41 self-report their general health as excellent or good<sup>47</sup>. While informative, these previous studies  
42  
43 only focused on self-reported health as an outcome. In the present study, we considered self-  
44  
45 reported health in addition to clinically measurable health outcomes. This is an important  
46  
47 distinction in order to establish that MVM users experience greater self-reported health in the  
48  
49 absence of clinically measurable health improvement. Nevertheless, it is encouraging that our  
50  
51  
52  
53  
54  
55  
56  
57  
58  
59  
60



1  
2  
3 results are consistent across the NHANES, military and Coast Guard and NHIS study cohorts,  
4  
5 and robust to different statistical analysis methodologies.  
6

7  
8       Limitations of this study include the cross-sectional design, reliability of self-reported  
9  
10 health, and income estimation using multiple imputation. First, the cross-sectional study design  
11  
12 prevents a demonstration of causal relationship between MVM use and self-reported health. The  
13  
14 lack of longitudinal data available to assess changes in self-reported health before and after  
15  
16 MVM supplementation prevents us from differentiating the two aforementioned explanations  
17  
18 that may contribute to widespread MVM use. Second, self-reported health may inherently harbor  
19  
20 reporting bias and residual confounding. Third, despite being recommended by the NHIS<sup>27</sup>, the  
21  
22 multiple imputation technique used to calculate income in cases in which data was missing may  
23  
24 generate estimation errors. Another limitation to the income-stratified results for self-reported  
25  
26 overall health may stem from the inability to factor income mobility. Interestingly, it has been  
27  
28 previously demonstrated that while high incomes are associated with longer life expectancies,  
29  
30 accounting for income mobility reduces the gap by approximately 50%<sup>48</sup>.  
31  
32  
33  
34  
35  
36  
37

### 38 **Conclusions**

39  
40 Using nationally representative survey data on health outcomes, our study reveals that MVM  
41  
42 users self-report better overall health than non-users despite not exhibiting improved health by  
43  
44 clinically measurable standards. Furthermore, we identify specific sociodemographic subgroups  
45  
46 of MVM users that are more prone to this behavior. The multibillion-dollar nature of the  
47  
48 nutritional supplement industry makes understanding the determinants of widespread MVM have  
49  
50 significant medical and financial consequences. Our findings may assist public health efforts to  
51  
52 better educate the general public about effective MVM use practices.  
53  
54  
55  
56  
57  
58  
59

## CONTRIBUTORS

MDP and ACC conceived and designed the study. MDP extracted data from NHANES. MDP, ACC, IP, PQD, JKW, RO, NJR, AA, AH, CCL, VO, IU, ALN, BSG, KTH, DHM, and GNN analyzed the data. MDP, ACC, KTH, and DHM wrote the manuscript. MDP, ACC, KTH, DHM, GNN, and RSC critically revised the manuscript for important intellectual content. All authors commented and approved the manuscript.

## FUNDING

ACC and PQD were supported by NIH Medical Scientist Training Program Training Grants T32GM007739 and T32GM007205 respectively.

## COMPETING INTERESTS

None declared.

## PATIENT CONSENT

None required.

## ETHICS APPROVAL

None required.

## DATA SHARING

All data used in the study is publicly available from the National Health Interview Survey.

## REFERENCES

1. Kantor ED, Rehm CD, Du M, White E, Giovannucci EL. Trends in dietary supplement use among US adults from 1999-2012. *JAMA - J Am Med Assoc.* 2016. doi:10.1001/jama.2016.14403
2. Bailey RL, Gahche JJ, Lentino C V, et al. Dietary supplement use in the United States, 2003-2006. *J Nutr.* 2011. doi:10.3945/jn.110.133025

- 1  
2  
3 3. Radimer K, Bindewald B, Hughes J, Ervin B, Swanson C, Picciano MF. Dietary  
4  
5 supplement use by US adults: Data from the National Health and Nutrition Examination  
6  
7 Survey, 1999-2000. *Am J Epidemiol*. 2004. doi:10.1093/aje/kwh207  
8  
9
- 10 4. Gahche J, Bailey R, Burt V, et al. Dietary supplement use among U.S. adults has  
11  
12 increased since NHANES III (1988-1994). *NCHS Data Brief*. 2011.  
13
- 14 5. Manson JAE, Bassuk SS. Vitamin and mineral supplements what clinicians need to know.  
15  
16 *JAMA - J Am Med Assoc*. 2018. doi:10.1001/jama.2017.21012  
17  
18
- 19 6. Sesso HD, Christen WG, Bubes V, et al. Multivitamins in the prevention of cardiovascular  
20  
21 disease in men: The physicians' health study II randomized controlled trial. *JAMA - J Am*  
22  
23 *Med Assoc*. 2012. doi:10.1001/jama.2012.14805  
24  
25
- 26 7. Rautiainen S, Gaziano JM, Christen WG, et al. Effect of Baseline Nutritional Status on  
27  
28 Long-term Multivitamin Use and Cardiovascular Disease Risk. *JAMA Cardiol*. 2017.  
29  
30 doi:10.1001/jamacardio.2017.0176  
31  
32
- 33 8. Rautiainen S, Lee IM, Rist PM, et al. Multivitamin use and cardiovascular disease in a  
34  
35 prospective study of women. *Am J Clin Nutr*. 2015. doi:10.3945/ajcn.114.088310  
36  
37
- 38 9. Hercberg S, Galan P, Preziosi P, et al. The SU.VI.MAX study: A randomized, placebo-  
39  
40 controlled trial of the health effects of antioxidant vitamins and minerals. *Arch Intern*  
41  
42 *Med*. 2004. doi:10.1001/archinte.164.21.2335  
43  
44
- 45 10. Lamas GA, Boineau R, Goertz C, et al. Oral High-Dose Multivitamin and Minerals After  
46  
47 Myocardial Infarction. *Ann Intern Med*. 2013. doi:10.7326/0003-4819-159-12-  
48  
49 201312170-00004  
50
- 51 11. Kim J, Choi J, Kwon SY, et al. Association of multivitamin and mineral supplementation  
52  
53 and risk of cardiovascular disease: A systematic review and meta-analysis. *Circ*  
54  
55  
56  
57  
58  
59

- 1  
2  
3 *Cardiovasc Qual Outcomes*. 2018. doi:10.1161/CIRCOUTCOMES.117.004224  
4  
5  
6 12. Moyer VA. Vitamin, mineral, and multivitamin supplements for the primary prevention of  
7  
8 cardiovascular disease and cancer: U.S. preventive services task force recommendation  
9  
10 statement. *Ann Intern Med*. 2014. doi:10.7326/M14-0198  
11  
12  
13 13. Fortmann SP, Burda BU, Senger CA, et al. Vitamin, Mineral, and Multivitamin  
14  
15 Supplements for the Primary Prevention of Cardiovascular Disease and Cancer: A  
16  
17 Systematic Evidence Review for the U.S. Preventive Services Task Force. *Evid Rep*.  
18  
19 2013. doi:10.7326/0003-4819-159-12-201312170-00729  
20  
21  
22 14. Grodstein F, O'Brien J, Kang JH, et al. Long-term multivitamin supplementation and  
23  
24 cognitive function in men: A randomized trial. *Ann Intern Med*. 2013.  
25  
26  
27 15. Grima NA, Pase MP, MacPherson H, Pipingas A. The effects of multivitamins on  
28  
29 cognitive performance: A systematic review and meta-analysis. *J Alzheimer's Dis*. 2012.  
30  
31 doi:10.3233/JAD-2011-111751  
32  
33  
34 16. Haskell CF, Robertson B, Jones E, et al. Effects of a multi-vitamin/mineral supplement on  
35  
36 cognitive function and fatigue during extended multi-tasking. *Hum Psychopharmacol*.  
37  
38 2010. doi:10.1002/hup.1144  
39  
40  
41 17. Gaziano JM, Sesso HD, Christen WG, et al. Multivitamins in the prevention of cancer in  
42  
43 men: The physicians' health study II randomized controlled trial. *JAMA - J Am Med*  
44  
45 *Assoc*. 2012. doi:10.1001/jama.2012.14641  
46  
47  
48 18. Neuhaus ML, Wassertheil-Smoller S, Thomson C, et al. Multivitamin use and risk of  
49  
50 cancer and cardiovascular disease in the women's health initiative cohorts. *Arch Intern*  
51  
52 *Med*. 2009. doi:10.1001/archinternmed.2008.540  
53  
54  
55 19. Larsson SC, Åkesson A, Bergkvist L, Wolk A. Multivitamin use and breast cancer  
56  
57  
58  
59  
60

- 1  
2  
3 incidence in a prospective cohort of Swedish women. *Am J Clin Nutr.* 2010.  
4  
5 doi:10.3945/ajcn.2009.28837  
6  
7  
8 20. Park S-Y, Murphy SP, Wilkens LR, Henderson BE, Kolonel LN. Multivitamin Use and  
9  
10 the Risk of Mortality and Cancer Incidence: The Multiethnic Cohort Study. *Am J*  
11  
12 *Epidemiol.* 2011. doi:10.1093/aje/kwq447  
13  
14  
15 21. Watkins ML, Erickson JD, Thun MJ, Mulinare J, Heath CW. Multivitamin use and  
16  
17 mortality in a large prospective study. *Am J Epidemiol.* 2000. doi:10.1093/aje/152.2.149  
18  
19  
20 22. Mursu J, Robien K, Harnack LJ, Park K, Jacobs DR. Dietary supplements and mortality  
21  
22 rate in older women: The Iowa women's health study. *Arch Intern Med.* 2011.  
23  
24 doi:10.1001/archinternmed.2011.445  
25  
26  
27 23. Macpherson H, Pipingas A, Pase MP. Multivitamin-multimineral supplementation and  
28  
29 mortality: A meta-analysis of randomized controlled trials. *Am J Clin Nutr.* 2013.  
30  
31 doi:10.3945/ajcn.112.049304  
32  
33  
34 24. 2012 NHIS Survey Description.  
35  
36 [https://ftp.cdc.gov/pub/health\\_statistics/nchs/dataset\\_documentation/NHIS/2012/srvydesc.](https://ftp.cdc.gov/pub/health_statistics/nchs/dataset_documentation/NHIS/2012/srvydesc.pdf)  
37  
38 pdf. Published 2012. Accessed April 24, 2019.  
39  
40  
41 25. Gonzales G, Przedworski J, Henning-Smith C. Comparison of health and health risk  
42  
43 factors between lesbian, gay, and bisexual adults and heterosexual adults in the United  
44  
45 States: Results from the national health interview survey. *JAMA Intern Med.* 2016.  
46  
47 doi:10.1001/jamainternmed.2016.3432  
48  
49  
50 26. Kessler RC, Barker PR, Colpe LJ, et al. Screening for serious mental illness in the general  
51  
52 population. *Arch Gen Psychiatry.* 2003. doi:10.1001/archpsyc.60.2.184  
53  
54  
55 27. Center for Health Statistics - Division of Health Interview Statistics N. *Multiple*  
56  
57  
58  
59  
60

- 1  
2  
3 *Imputation of Family Income and Personal Earnings in the National Health Interview*  
4 *Survey: Methods and Examples.*; 2013. <https://www.cdc.gov/nchs/data/nhis/tecdoc13.pdf>.  
5  
6 Accessed July 8, 2019.  
7  
8  
9
- 10 28. Cowan AE, Jun S, Gahche JJ, et al. Dietary supplement use differs by socioeconomic and  
11 health-related characteristics among U.S. adults, NHANES 2011–2014. *Nutrients*. 2018.  
12 doi:10.3390/nu10081114  
13  
14  
15  
16 29. Bailey RL, Gahche JJ, Miller PE, Thomas PR, Dwyer JT. Why US adults use dietary  
17 supplements. *JAMA Intern Med*. 2013. doi:10.1001/jamainternmed.2013.2299  
18  
19  
20  
21 30. Petrie KJ, Weinman J, Sharpe N, Buckley J. Role of patients' view of their illness in  
22 predicting return to work and functioning after myocardial infarction: Longitudinal study.  
23 *Br Med J*. 1996. doi:10.1136/bmj.312.7040.1191  
24  
25  
26  
27 31. Juergens MC, Seekatz B, Moosdorf RG, Petrie KJ, Rief W. Illness beliefs before cardiac  
28 surgery predict disability, quality of life, and depression 3 months later. *J Psychosom Res*.  
29 2010. doi:10.1016/j.jpsychores.2009.10.004  
30  
31  
32  
33 32. Barefoot JC, Brummett BH, Williams RB, et al. Recovery expectations and long-term  
34 prognosis of patients with coronary heart disease. *Arch Intern Med*. 2011.  
35 doi:10.1001/archinternmed.2011.41  
36  
37  
38  
39 33. Habibović M, Pedersen SS, Van Den Broek KC, Denollet J. Monitoring treatment  
40 expectations in patients with an implantable cardioverter-defibrillator using the EXPECT-  
41 ICD scale. *Europace*. 2014. doi:10.1093/europace/euu006  
42  
43  
44  
45 34. Colagiuri B, Zachariae R. Patient expectancy and post-chemotherapy nausea: A meta-  
46 analysis. *Ann Behav Med*. 2010. doi:10.1007/s12160-010-9186-4  
47  
48  
49  
50 35. Nestoriuc Y, von Blanckenburg P, Schuricht F, et al. Is it best to expect the worst?  
51  
52  
53  
54  
55  
56  
57  
58  
59  
60

- 1  
2  
3 Influence of patients' side-effect expectations on endocrine treatment outcome in a 2-year  
4 prospective clinical cohort study. *Ann Oncol*. 2016. doi:10.1093/annonc/mdw266  
5  
6  
7  
8 36. Mahomed NN, Liang MH, Cook EF, et al. The importance of patient expectations in  
9 predicting functional outcomes after total joint arthroplasty. *J Rheumatol*. 2002.  
10  
11  
12 37. Oettingen G, Mayer D. The motivating function of thinking about the future: Expectations  
13 versus fantasies. *J Pers Soc Psychol*. 2002. doi:10.1037/0022-3514.83.5.1198  
14  
15  
16 38. Booth-Kewley S, Schmied EA, Highfill-McRoy RM, Sander TC, Blivin SJ, Garland CF.  
17 A prospective study of factors affecting recovery from musculoskeletal injuries. *J Occup*  
18  
19  
20  
21  
22  
23 39. Murgatroyd DF, Harris IA, Tran Y, Cameron ID. Predictors of return to work following  
24 motor vehicle related orthopaedic trauma. *BMC Musculoskelet Disord*. 2016.  
25  
26  
27  
28  
29  
30  
31 40. Oettingen G, Wadden TA. Expectation, fantasy, and weight loss: Is the impact of positive  
32 thinking always positive? *Cognit Ther Res*. 1991. doi:10.1007/BF01173206  
33  
34  
35 41. Armitage CJ, Norman P, Alganem S, Conner M. Expectations Are More Predictive of  
36 Behavior than Behavioral Intentions: Evidence from Two Prospective Studies. *Ann Behav*  
37  
38  
39  
40  
41  
42 42. Crane MM, Ward DS, Lutes LD, Bowling JM, Tate DF. Theoretical and Behavioral  
43 Mediators of a Weight Loss Intervention for Men. *Ann Behav Med*. 2016.  
44  
45  
46  
47  
48  
49 43. Lentjes MAH. The balance between food and dietary supplements in the general  
50 population. *Proc Nutr Soc*. 2019. doi:10.1017/s0029665118002525  
51  
52  
53 44. Boerma T, Hosseinpoor AR, Verdes E, Chatterji S. A global assessment of the gender gap  
54  
55  
56  
57  
58  
59

- 1  
2  
3 in self-reported health with survey data from 59 countries. *BMC Public Health*. 2016.  
4  
5 doi:10.1186/s12889-016-3352-y  
6  
7  
8 45. Hosseinpoor AR, Stewart Williams J, Amin A, et al. Social determinants of self-reported  
9  
10 health in women and men: Understanding the role of gender in population health. *PLoS*  
11  
12 *One*. 2012. doi:10.1371/journal.pone.0034799  
13  
14  
15 46. Bethune R, Absher N, Obiagwu M, et al. Social determinants of self-reported health for  
16  
17 Canada's indigenous peoples: a public health approach. *Public Health*. 2018.  
18  
19  
20 47. Austin KG, McGraw SM, Lieberman HR. Multivitamin and protein supplement use is  
21  
22 associated with positive mood states and health behaviors in US military and coast guard  
23  
24 personnel. *J Clin Psychopharmacol*. 2014. doi:10.1097/JCP.000000000000193  
25  
26  
27 48. Kreiner CT, Nielsen TH, Serena BL. Role of income mobility for the measurement of  
28  
29 inequality in life expectancy. *Proc Natl Acad Sci*. 2018. doi:10.1073/pnas.1811455115  
30  
31  
32  
33  
34  
35  
36  
37  
38  
39  
40  
41  
42  
43  
44  
45  
46  
47  
48  
49  
50  
51  
52  
53  
54  
55  
56  
57  
58  
59  
60



**Table 1: Characteristics of American Adults by Multivitamin and Multiminerals Supplement (MVM) Usage**

| Characteristic                                                         | MVM non-users<br>(n = 4933 <sup>a</sup> ) | MVM users<br>(n = 16670 <sup>a</sup> ) | FDR-<br>adjusted<br><i>P</i> value <sup>b</sup> |
|------------------------------------------------------------------------|-------------------------------------------|----------------------------------------|-------------------------------------------------|
| Weighted sample %                                                      | 22.4 (21.8-23.0)                          | 77.6 (76.9-78.0)                       |                                                 |
| Age, % (95% CI) <sup>c</sup>                                           |                                           |                                        |                                                 |
| Mean age in years (95% CI)                                             | 48.1 (47.4-48.7)                          | 49.7 (49.3-50.2)                       |                                                 |
| 18-27 years                                                            | 14.9 (13.8-16.2)                          | 13.1 (12.2-14.1)                       |                                                 |
| 28-37 years                                                            | 16.6 (15.4-18.0)                          | 16.9 (16.2-17.7)                       |                                                 |
| 38-47 years                                                            | 17.4 (16.3-18.6)                          | 15.3 (14.6-15.9)                       | <0.001                                          |
| 48-57 years                                                            | 17.7 (16.4-19.0)                          | 17.6 (16.9-18.3)                       |                                                 |
| 58-67 years                                                            | 14.3 (13.2-15.5)                          | 15.4 (14.8-16.1)                       |                                                 |
| 68-80 years                                                            | 10.1 (9.2-11.1)                           | 12.8 (12.1-13.5)                       |                                                 |
| ≥ 80 years                                                             | 5.9 (5.1-6.8)                             | 6.2 (5.7-6.7)                          |                                                 |
| Race, % (95% CI) <sup>c</sup>                                          |                                           |                                        |                                                 |
| White only                                                             | 82.2 (81.0-83.3)                          | 82.9 (82.1-83.6)                       |                                                 |
| Black/African American only                                            | 11.4 (10.4-12.5)                          | 10.4 (9.9-11.0)                        |                                                 |
| American Indian/ Alaskan Native only                                   | 1.1 (0.8-1.4)                             | 0.6 (0.5-0.8)                          | <0.001                                          |
| Asian only                                                             | 3.5 (3.1-4.0)                             | 4.3 (3.9-4.6)                          |                                                 |
| Multiple race                                                          | 1.8 (1.5-2.2)                             | 1.9 (1.6-2.1)                          |                                                 |
| % Female (95% CI) <sup>c</sup>                                         | 54.1 (52.6-55.6)                          | 59.1 (58.2-60.1)                       | <0.001                                          |
| Family Income, relative to federal poverty level (95% CI) <sup>c</sup> |                                           |                                        |                                                 |
| <100%                                                                  | 16.9 (15.3-18.4)                          | 12.4 (11.5-13.3)                       |                                                 |
| 100%-199%                                                              | 19.7 (18.2-21.2)                          | 17.9 (17.1-18.8)                       |                                                 |
| 200%- 299%                                                             | 17.3 (15.8-18.7)                          | 17.0 (16.2-17.8)                       | <0.001                                          |
| 300%-399%                                                              | 12.8 (11.4-14.2)                          | 13.4 (12.6-14.1)                       |                                                 |
| 400% +                                                                 | 33.4 (31.1-35.6)                          | 39.4 (37.9-40.9)                       |                                                 |
| Education status, % (95% CI) <sup>c</sup>                              |                                           |                                        |                                                 |
| Did not graduate high school                                           | 11.7 (10.7-12.8)                          | 9.6 (9.0-10.1)                         |                                                 |
| Grade 12 or GED                                                        | 26.6 (24.8-28.5)                          | 22.4 (21.4-23.4)                       |                                                 |
| Some college, no degree                                                | 22.1 (20.5-23.8)                          | 21.2 (20.1-22.4)                       | <0.001                                          |
| Associates degree                                                      | 10.8 (9.7-11.9)                           | 12.0 (11.4-12.6)                       |                                                 |
| College graduate or higher                                             | 28.7 (26.7-30.7)                          | 34.7 (33.3-36.2)                       |                                                 |
| Relationship status, % (95% CI) <sup>c</sup>                           |                                           |                                        |                                                 |

|    |                                                                                          |                  |                  |        |
|----|------------------------------------------------------------------------------------------|------------------|------------------|--------|
| 1  |                                                                                          |                  |                  |        |
| 2  |                                                                                          |                  |                  |        |
| 3  | Married or living with partner                                                           | 49.0 (46.4-51.7) | 51.0 (49.4-52.7) |        |
| 4  | Separated, divorced, or widowed                                                          | 26.6 (25.0-28.3) | 26.7 (25.6-27.8) | <0.001 |
| 5  | Never married                                                                            | 24.3 (22.5-26.1) | 22.3 (21.0-23.5) |        |
| 6  |                                                                                          |                  |                  |        |
| 7  | Employment status, % (95% CI <sup>c</sup> )                                              |                  |                  |        |
| 8  | Employed                                                                                 | 58.1 (55.2-60.9) | 58.6 (56.7-60.5) |        |
| 9  | Unemployed, looking for work                                                             | 6.1 (5.2-7.0)    | 5.2 (4.8-5.6)    | 0.05   |
| 10 | Not in labor force                                                                       | 35.8 (33.7-37.9) | 36.2 (34.8-37.6) |        |
| 11 | Minor child in household, % (95% CI <sup>c</sup> )                                       | 30.4 (28.8-32.0) | 26.5 (25.5-27.3) | <0.001 |
| 12 | Non-English-speaking interview, % (95% CI <sup>c</sup> )                                 | 3.6 (3.1-4.1)    | 3.5 (3.1-3.8)    | 0.66   |
| 13 |                                                                                          |                  |                  |        |
| 14 | Has health insurance, % (95% CI <sup>c</sup> )                                           | 84.3 (83.1-85.4) | 87.4 (86.9-88.0) | <0.001 |
| 15 | No office visit for health care in the past two weeks, % (95% CI <sup>c</sup> )          | 79.8 (78.6-81.0) | 76.4 (75.7-77.1) | <0.001 |
| 16 |                                                                                          |                  |                  |        |
| 17 | Unmet medical care due to cost in the past year, % (95% CI <sup>c</sup> )                | 9.4 (8.5-10.3)   | 8.7 (8.3-9.2)    | 0.19   |
| 18 |                                                                                          |                  |                  |        |
| 19 |                                                                                          |                  |                  |        |
| 20 |                                                                                          |                  |                  |        |
| 21 |                                                                                          |                  |                  |        |
| 22 |                                                                                          |                  |                  |        |
| 23 |                                                                                          |                  |                  |        |
| 24 |                                                                                          |                  |                  |        |
| 25 |                                                                                          |                  |                  |        |
| 26 | a. Unweighted sample size                                                                |                  |                  |        |
| 27 |                                                                                          |                  |                  |        |
| 28 | b. FDR-adjusted P value was computed using the Benjamini-Hochberg procedure. P values    |                  |                  |        |
| 29 | were computed using a two-sample t-test or chi-square test for independence.             |                  |                  |        |
| 30 |                                                                                          |                  |                  |        |
| 31 | c. All confidence intervals were computed based on a Rao-Scott-scaled chi-squared        |                  |                  |        |
| 32 | distribution for the loglikelihood from a binomial distribution using the Survey package |                  |                  |        |
| 33 | in R.                                                                                    |                  |                  |        |
| 34 |                                                                                          |                  |                  |        |
| 35 |                                                                                          |                  |                  |        |
| 36 |                                                                                          |                  |                  |        |
| 37 |                                                                                          |                  |                  |        |
| 38 |                                                                                          |                  |                  |        |
| 39 |                                                                                          |                  |                  |        |
| 40 |                                                                                          |                  |                  |        |
| 41 |                                                                                          |                  |                  |        |
| 42 |                                                                                          |                  |                  |        |
| 43 |                                                                                          |                  |                  |        |
| 44 |                                                                                          |                  |                  |        |
| 45 |                                                                                          |                  |                  |        |
| 46 |                                                                                          |                  |                  |        |
| 47 |                                                                                          |                  |                  |        |
| 48 |                                                                                          |                  |                  |        |
| 49 |                                                                                          |                  |                  |        |
| 50 |                                                                                          |                  |                  |        |
| 51 |                                                                                          |                  |                  |        |
| 52 |                                                                                          |                  |                  |        |
| 53 |                                                                                          |                  |                  |        |
| 54 |                                                                                          |                  |                  |        |
| 55 |                                                                                          |                  |                  |        |
| 56 |                                                                                          |                  |                  |        |
| 57 |                                                                                          |                  |                  |        |
| 58 |                                                                                          |                  |                  |        |
| 59 |                                                                                          |                  |                  |        |
| 60 |                                                                                          |                  |                  |        |

**Table 2. Effect of MVM Usage on Health Status**

| Characteristic                                                                      | MVM non-users    | MVM users        | Adjusted Effect of MVM usage, $\beta$ or OR (95% CI) <sup>a</sup> | FDR-adjusted <i>P</i> value <sup>e</sup> |
|-------------------------------------------------------------------------------------|------------------|------------------|-------------------------------------------------------------------|------------------------------------------|
| Self-rated overall health as excellent, very good or good, % (95% CI <sup>f</sup> ) | 84.9 (83.8-86.0) | 88.3 (87.7-88.9) | OR=1.3 (1.2-1.5)                                                  | <0.001                                   |
| Needs help with ADLs, % (95% CI <sup>f</sup> )                                      | 5.6 (4.8-6.3)    | 4.8 (4.4-5.2)    | OR = 0.86 (0.7-1.04)                                              | 0.07                                     |
| History of chronic conditions, % (95% CI <sup>f</sup> )                             |                  |                  |                                                                   |                                          |
| Mean number of chronic conditions                                                   | 1.07 (1.03-1.11) | 1.09 (1.06-1.11) | $\beta = 0.03$ (-0.07-0.007)                                      | 0.07                                     |
| No chronic conditions                                                               | 44.4 (42.0-46.8) | 43.0 (41.4-44.5) |                                                                   |                                          |
| 1 chronic condition                                                                 | 26.3 (24.5-28.2) | 26.4 (25.4-27.5) |                                                                   |                                          |
| Multiple chronic conditions                                                         | 28.4 (26.7-30.0) | 29.7 (28.6-30.7) |                                                                   |                                          |
| Health conditions in past year <sup>d</sup> (95% CI <sup>f</sup> )                  |                  |                  |                                                                   |                                          |
| Mean number of present conditions                                                   | 2.8 (2.7-2.9)    | 2.7 (2.7-2.8)    | $\beta=-0.06$ (-0.2-0.02)                                         | 0.08                                     |
| 0-5 present conditions                                                              | 84.7 (81.3-88.1) | 85.2 (83.0-87.6) |                                                                   |                                          |
| 6-10 present conditions                                                             | 12.7 (11.6-13.8) | 12.4 (11.7-13.0) |                                                                   |                                          |
| $\geq 10$ present conditions                                                        | 1.5 (1.1-1.9)    | 1.4 (1.2-1.6)    |                                                                   |                                          |
| Kessler 6-item score, % (95% CI <sup>f</sup> )                                      |                  |                  |                                                                   |                                          |
| Mean Kessler score                                                                  | 2.5 (2.4 -2.6)   | 2.3 (2.3-2.4)    | $\beta=-0.08$ (-0.2-0.04)                                         | 0.13                                     |
| No impairment                                                                       | 80.9 (77.4-84.4) | 82.3 (80.0-84.6) |                                                                   |                                          |
| Moderate Impairment                                                                 | 15.4 (14.2-16.6) | 14.8 (14.1-15.5) |                                                                   |                                          |
| Severe Impairment                                                                   | 3.7 (3.1-4.2)    | 2.9 (2.6-3.2)    |                                                                   |                                          |

a) Estimates were produced after adjusting for age, sex, race, region, education level, income, employment status, health insurance status, presence of child in household,

1  
2  
3 marital status, unmet medical care due to cost in the past year, and not seeing a health  
4 professional in office in the past two weeks  
5  
6

- 7  
8 b) *P* value was defined using a multivariate regression model controlling for age, sex, race,  
9 region, education level, income, employment status, health insurance status, presence of  
10 child in household, marital status, unmet medical care due to cost in the past year, and not  
11 seeing a health professional in office in the past two weeks  
12  
13  
14  
15  
16  
17 c) Ten chronic diseases included: cancer, hypertension, coronary heart disease, stroke,  
18 chronic obstructive pulmonary disease, asthma, diabetes, arthritis, hepatitis, and  
19 weak/failing kidneys  
20  
21  
22  
23  
24 d) 19 health conditions in the past 12 months included: respiratory, digestive, skin, and other  
25 allergy, acid reflux, hay fever, chest cold, nausea and vomiting, sore throat, infectious  
26 disease, recurring headache, memory loss, neurological problems, sprains, and  
27 abdominal, dental, muscle/bone, chronic, and skin pain  
28  
29  
30  
31  
32  
33 e) FDR-adjusted *P* values were computed using the Benjamini-Hochberg procedure  
34  
35  
36 f) All confidence intervals were computed based on a Rao-Scott-scaled chi-squared  
37 distribution for the loglikelihood from a binomial distribution using the Survey package  
38 in R.  
39  
40  
41  
42  
43  
44  
45  
46  
47  
48  
49  
50  
51  
52  
53  
54  
55  
56  
57  
58  
59  
60

**Table 3: Association Between MVM Usage and Self-Reported Overall Health in Sociodemographic Subgroups**

| Group                                                            | Self-rated overall health as excellent, very good or good, % (95% CI <sup>a</sup> ), MVM Non-Users | Self-rated overall health as excellent, very good or good, % (95% CI <sup>a</sup> ), MVM Users | Adjusted Effect of MVM usage on self-reported health, OR (95% CI <sup>a</sup> ) <sup>b</sup> | FDR Adjusted <i>P</i> value <sup>c</sup> |
|------------------------------------------------------------------|----------------------------------------------------------------------------------------------------|------------------------------------------------------------------------------------------------|----------------------------------------------------------------------------------------------|------------------------------------------|
| <b>Age</b>                                                       |                                                                                                    |                                                                                                |                                                                                              |                                          |
| 18-44 years                                                      | 92.3 (91.1-93.5)                                                                                   | 94.2 (93.6-94.8)                                                                               | 1.3 (1.0-1.6)                                                                                | 0.03                                     |
| 45-64 years                                                      | 79.9 (77.8-82.1)                                                                                   | 85.3 (84.2-86.4)                                                                               | 1.3 (1.1-1.6)                                                                                | 0.009                                    |
| 65+ years                                                        | 77.2 (73.8-80.5)                                                                                   | 82.0 (80.6-83.4)                                                                               | 1.2 (1.0-1.5)                                                                                | 0.06                                     |
| <b>Race</b>                                                      |                                                                                                    |                                                                                                |                                                                                              |                                          |
| White                                                            | 85.9 (84.7-87.2)                                                                                   | 89.1 (88.5-89.7)                                                                               | 1.3 (1.1-1.7)                                                                                | 0.009                                    |
| Non-white                                                        | 80.0 (77.2-82.7)                                                                                   | 84.2 (82.8-85.6)                                                                               | 1.3 (1.1-1.5)                                                                                | 0.007                                    |
| <b>Sex</b>                                                       |                                                                                                    |                                                                                                |                                                                                              |                                          |
| Female                                                           | 84.0 (82.5-85.4)                                                                                   | 88.1 (87.4-88.9)                                                                               | 1.2 (1.1-1.4)                                                                                | 0.009                                    |
| Male                                                             | 85.9 (84.2-87.7)                                                                                   | 88.4 (87.5-89.3)                                                                               | 1.3 (1.1-1.6)                                                                                | 0.009                                    |
| <b>Family Income, relative to federal poverty level (95% CI)</b> |                                                                                                    |                                                                                                |                                                                                              |                                          |
| <100%                                                            | 71.7 (68.0-75.4)                                                                                   | 75.6 (73.1-78.1)                                                                               | 1.4 (1.1-1.8)                                                                                | 0.007                                    |
| 100%-199%                                                        | 76.4 (73.6-79.2)                                                                                   | 80.7 (79.0-82.4)                                                                               | 1.4 (1.1-1.7)                                                                                | 0.007                                    |
| 200%- 299%                                                       | 84.8 (82.1-87.5)                                                                                   | 87.3 (85.9-88.6)                                                                               | 1.3 (1.0-1.7)                                                                                | 0.04                                     |
| 300%-399%                                                        | 89.6 (86.4-92.7)                                                                                   | 91.0 (89.6-92.4)                                                                               | 1.3 (0.9-2.0)                                                                                | 0.15                                     |
| 400% +                                                           | 94.8 (93.5-96.1)                                                                                   | 95.2 (94.6-95.8)                                                                               | 1.1 (0.8-1.6)                                                                                | 0.23                                     |
| <b>Education</b>                                                 |                                                                                                    |                                                                                                |                                                                                              |                                          |
| Did not graduate high school                                     | 67.2 (63.1-71.3)                                                                                   | 71.9 (69.7-74.2)                                                                               | 1.4 (1.1-1.9)                                                                                | 0.01                                     |

|                            |                  |                  |               |      |
|----------------------------|------------------|------------------|---------------|------|
| High school graduate       | 84.1 (82.6-85.5) | 86.7 (85.9-87.4) | 1.2 (1.0-1.4) | 0.01 |
| College graduate or higher | 93.8 (92.4-95.1) | 95.3 (94.7-95.9) | 1.4 (1.0-1.9) | 0.03 |

- a) All confidence intervals were computed based on a Rao-Scott-scaled chi-squared distribution for the loglikelihood from a binomial distribution using the Survey package in R.
- b) Estimates were produced after adjusting for age, sex, race, region, education level, income, employment status, health insurance status, presence of child in household, marital status, unmet medical care due to cost in the past year, and not seeing a health professional in office in the past two weeks.
- c) FDR-adjusted *P* values were computed using the Benjamini-Hochberg procedure. *P* value was defined using a multivariate regression model controlling for age, sex, race, region, education level, income, employment status, health insurance status, presence of child in household, marital status, unmet medical care due to cost in the past year, and not seeing a health professional in office in the past two weeks.

1  
2  
3 **Supplement for:**  
4

5 **Self-reported health without clinically measurable benefits among adult users of**  
6 **multivitamin and multimineral supplements: a cross-sectional study**  
7

8  
9  
10 Paranjpe, Chin et. al.  
11  
12

13  
14 **Tables:**

15 Table S1: Interaction between demographic variable and MVM use on self-reported health  
16  
17  
18  
19  
20  
21  
22  
23  
24  
25  
26  
27  
28  
29  
30  
31  
32  
33  
34  
35  
36  
37  
38  
39  
40  
41  
42  
43  
44  
45  
46  
47  
48  
49  
50  
51  
52  
53  
54  
55  
56  
57  
58  
59  
60

**Table S1: Interaction between demographic variable and MVM use on self-reported health**

| Demographic Variable                                                                          | MVM use:demographic variable interaction on self-reported overall health, $\beta_{\text{Interaction}}$ (95% CI) <sup>a</sup> | FDR Adjusted <i>P</i> value <sup>b</sup> |
|-----------------------------------------------------------------------------------------------|------------------------------------------------------------------------------------------------------------------------------|------------------------------------------|
| Age (18-44 years, 45-64 years, 65+ years)                                                     | 1.1 (0.9-1.2)                                                                                                                | 0.50                                     |
| Race (White or non-white)                                                                     | 1.0 (0.9-1.1)                                                                                                                | 0.50                                     |
| Sex                                                                                           | 1.0 (0.8-1.3)                                                                                                                | 0.50                                     |
| Family Income, relative to federal poverty level (<100%, 100-199%, 200-299%, 300-399%, 400%+) | 1.0 (0.9-1.1)                                                                                                                | 0.50                                     |
| Education (Did not graduate high school, high school graduate, college graduate)              | 1.0 (1.0-1.1)                                                                                                                | 0.50                                     |

- a) Estimates were produced after adjusting for age, sex, race, region, education level, income, employment status, health insurance status, presence of child in household, marital status, unmet medical care due to cost in the past year, and not seeing a health professional in office in the past two weeks.
- b) FDR-adjusted *P* values were computed using the Benjamini-Hochberg procedure. *P* value was defined using a multivariate regression model controlling for age, sex, race, region, education level, income, employment status, health insurance status, presence of child in household, marital status, unmet medical care due to cost in the past year, and not seeing a health professional in office in the past two weeks.



STROBE Statement—Checklist of items that should be included in reports of *cross-sectional studies*

|                              | Item No | Recommendation                                                                                                                                                                                               | Page No |
|------------------------------|---------|--------------------------------------------------------------------------------------------------------------------------------------------------------------------------------------------------------------|---------|
| <b>Title and abstract</b>    | 1       | (a) Indicate the study's design with a commonly used term in the title or the abstract                                                                                                                       | 1       |
|                              |         | (b) Provide in the abstract an informative and balanced summary of what was done and what was found                                                                                                          | 2       |
| <b>Introduction</b>          |         |                                                                                                                                                                                                              |         |
| Background/rationale         | 2       | Explain the scientific background and rationale for the investigation being reported                                                                                                                         | 4-5     |
| Objectives                   | 3       | State specific objectives, including any prespecified hypotheses                                                                                                                                             | 2       |
| <b>Methods</b>               |         |                                                                                                                                                                                                              |         |
| Study design                 | 4       | Present key elements of study design early in the paper                                                                                                                                                      | 6-7     |
| Setting                      | 5       | Describe the setting, locations, and relevant dates, including periods of recruitment, exposure, follow-up, and data collection                                                                              | 6-7     |
| Participants                 | 6       | (a) Give the eligibility criteria, and the sources and methods of selection of participants                                                                                                                  | 6       |
| Variables                    | 7       | Clearly define all outcomes, exposures, predictors, potential confounders, and effect modifiers. Give diagnostic criteria, if applicable                                                                     | 6-7     |
| Data sources/<br>measurement | 8*      | For each variable of interest, give sources of data and details of methods of assessment (measurement). Describe comparability of assessment methods if there is more than one group                         | 6-7     |
| Bias                         | 9       | Describe any efforts to address potential sources of bias                                                                                                                                                    | 6-7     |
| Study size                   | 10      | Explain how the study size was arrived at                                                                                                                                                                    | 6-7     |
| Quantitative variables       | 11      | Explain how quantitative variables were handled in the analyses. If applicable, describe which groupings were chosen and why                                                                                 | 7       |
| Statistical methods          | 12      | (a) Describe all statistical methods, including those used to control for confounding                                                                                                                        | 7       |
|                              |         | (b) Describe any methods used to examine subgroups and interactions                                                                                                                                          | 7       |
|                              |         | (c) Explain how missing data were addressed                                                                                                                                                                  | 7       |
|                              |         | (d) If applicable, describe analytical methods taking account of sampling strategy                                                                                                                           | 7       |
|                              |         | (e) Describe any sensitivity analyses                                                                                                                                                                        | 7       |
| <b>Results</b>               |         |                                                                                                                                                                                                              |         |
| Participants                 | 13*     | (a) Report numbers of individuals at each stage of study—eg numbers potentially eligible, examined for eligibility, confirmed eligible, included in the study, completing follow-up, and analysed            | 8       |
|                              |         | (b) Give reasons for non-participation at each stage                                                                                                                                                         | 8       |
|                              |         | (c) Consider use of a flow diagram                                                                                                                                                                           |         |
| Descriptive data             | 14*     | (a) Give characteristics of study participants (eg demographic, clinical, social) and information on exposures and potential confounders                                                                     | 8       |
|                              |         | (b) Indicate number of participants with missing data for each variable of interest                                                                                                                          | 8       |
| Outcome data                 | 15*     | Report numbers of outcome events or summary measures                                                                                                                                                         | 8-10    |
| Main results                 | 16      | (a) Give unadjusted estimates and, if applicable, confounder-adjusted estimates and their precision (eg, 95% confidence interval). Make clear which confounders were adjusted for and why they were included | 8-10    |

|                          |    |                                                                                                                                                                            |       |
|--------------------------|----|----------------------------------------------------------------------------------------------------------------------------------------------------------------------------|-------|
|                          |    | (b) Report category boundaries when continuous variables were categorized                                                                                                  | 8-10  |
|                          |    | (c) If relevant, consider translating estimates of relative risk into absolute risk for a meaningful time period                                                           |       |
| Other analyses           | 17 | Report other analyses done—eg analyses of subgroups and interactions, and sensitivity analyses                                                                             | 9-10  |
| <b>Discussion</b>        |    |                                                                                                                                                                            |       |
| Key results              | 18 | Summarise key results with reference to study objectives                                                                                                                   | 10-11 |
| Limitations              | 19 | Discuss limitations of the study, taking into account sources of potential bias or imprecision. Discuss both direction and magnitude of any potential bias                 | 12-13 |
| Interpretation           | 20 | Give a cautious overall interpretation of results considering objectives, limitations, multiplicity of analyses, results from similar studies, and other relevant evidence | 11-13 |
| Generalisability         | 21 | Discuss the generalisability (external validity) of the study results                                                                                                      | 12    |
| <b>Other information</b> |    |                                                                                                                                                                            |       |
| Funding                  | 22 | Give the source of funding and the role of the funders for the present study and, if applicable, for the original study on which the present article is based              | 14    |

\*Give information separately for exposed and unexposed groups.

**Note:** An Explanation and Elaboration article discusses each checklist item and gives methodological background and published examples of transparent reporting. The STROBE checklist is best used in conjunction with this article (freely available on the Web sites of PLoS Medicine at <http://www.plosmedicine.org/>, Annals of Internal Medicine at <http://www.annals.org/>, and Epidemiology at <http://www.epidem.com/>). Information on the STROBE Initiative is available at [www.strobe-statement.org](http://www.strobe-statement.org).

# BMJ Open

## Self-reported health without clinically measurable benefits among adult users of multivitamin and multiminerall supplements: a cross-sectional study

|                                 |                                                                                                                                                                                                                                                                                                                                                                                                                                                                                                                                                                                                                                                                                                                                                                                                                                                                                                                                                                                                                                                                                                                                                                                                                                                                                                                                                                                                                                                                                                                                                                                                                                                                                                                                                                     |
|---------------------------------|---------------------------------------------------------------------------------------------------------------------------------------------------------------------------------------------------------------------------------------------------------------------------------------------------------------------------------------------------------------------------------------------------------------------------------------------------------------------------------------------------------------------------------------------------------------------------------------------------------------------------------------------------------------------------------------------------------------------------------------------------------------------------------------------------------------------------------------------------------------------------------------------------------------------------------------------------------------------------------------------------------------------------------------------------------------------------------------------------------------------------------------------------------------------------------------------------------------------------------------------------------------------------------------------------------------------------------------------------------------------------------------------------------------------------------------------------------------------------------------------------------------------------------------------------------------------------------------------------------------------------------------------------------------------------------------------------------------------------------------------------------------------|
| Journal:                        | <i>BMJ Open</i>                                                                                                                                                                                                                                                                                                                                                                                                                                                                                                                                                                                                                                                                                                                                                                                                                                                                                                                                                                                                                                                                                                                                                                                                                                                                                                                                                                                                                                                                                                                                                                                                                                                                                                                                                     |
| Manuscript ID                   | bmjopen-2020-039119.R1                                                                                                                                                                                                                                                                                                                                                                                                                                                                                                                                                                                                                                                                                                                                                                                                                                                                                                                                                                                                                                                                                                                                                                                                                                                                                                                                                                                                                                                                                                                                                                                                                                                                                                                                              |
| Article Type:                   | Original research                                                                                                                                                                                                                                                                                                                                                                                                                                                                                                                                                                                                                                                                                                                                                                                                                                                                                                                                                                                                                                                                                                                                                                                                                                                                                                                                                                                                                                                                                                                                                                                                                                                                                                                                                   |
| Date Submitted by the Author:   | 15-Jul-2020                                                                                                                                                                                                                                                                                                                                                                                                                                                                                                                                                                                                                                                                                                                                                                                                                                                                                                                                                                                                                                                                                                                                                                                                                                                                                                                                                                                                                                                                                                                                                                                                                                                                                                                                                         |
| Complete List of Authors:       | <p>Paranjpe, Manish; Harvard Medical School, Health Sciences and Technology Program<br/> Chin, Alfred; Weill Cornell Medical College, Weill Cornell/Rockefeller/Sloan Kettering Tri-Institutional MD-PhD Program<br/> Paranjpe, Ishan; Mount Sinai School of Medicine, Charles Bronfman Institute for Personalized Medicine<br/> Reid, Nicholas; Harvard Medical School<br/> Duy, Phan; Yale University School of Medicine, Medical Scientist Training Program<br/> Wang, Jason; Harvard Medical School, Health Sciences and Technology Program<br/> O'Hagan, Ross; Mount Sinai School of Medicine, Charles Bronfman Institute for Personalized Medicine<br/> Arzani, Artine ; Weill Cornell Medical College<br/> Haghdel, Arsalan ; Weill Cornell Medical College<br/> Lim, Clarence; Texas A&amp;M University System Health Science Center College of Medicine<br/> Orhurhu, Vwaire ; Harvard Medical School, Department of Anesthesia, Critical Care and Pain MedicineBeth Israel Deaconess Medical Center; Harvard Medical School<br/> Urits, Ivan; Massachusetts General Hospital, Department of Anesthesia, Critical Care and Pain Medicine; Harvard Medical School<br/> Ngo, Anh; Beth Israel Deaconess Medical Center, Department of Anesthesia, Critical Care, and Pain Medicine; Harvard Medical School<br/> Glicksberg, Benjamin; Mount Sinai School of Medicine, Charles Bronfman Institute for Personalized Medicine<br/> Hall, Kathryn; Brigham and Women's Hospital, Division of Preventive Medicine; Beth Israel Deaconess Medical Center, Program in Placebo Studies<br/> Mehta, Darshan ; Massachusetts General Hospital,<br/> Cooper, Richard; Loyola University Medical Center<br/> Nadkarni, GN ; Icahn School of Medicine at Mount Sinai,</p> |
| <b>Primary Subject Heading</b>: | Nutrition and metabolism                                                                                                                                                                                                                                                                                                                                                                                                                                                                                                                                                                                                                                                                                                                                                                                                                                                                                                                                                                                                                                                                                                                                                                                                                                                                                                                                                                                                                                                                                                                                                                                                                                                                                                                                            |
| Secondary Subject Heading:      | General practice / Family practice, Complementary medicine                                                                                                                                                                                                                                                                                                                                                                                                                                                                                                                                                                                                                                                                                                                                                                                                                                                                                                                                                                                                                                                                                                                                                                                                                                                                                                                                                                                                                                                                                                                                                                                                                                                                                                          |
| Keywords:                       | NUTRITION & DIETETICS, GENERAL MEDICINE (see Internal Medicine), COMPLEMENTARY MEDICINE                                                                                                                                                                                                                                                                                                                                                                                                                                                                                                                                                                                                                                                                                                                                                                                                                                                                                                                                                                                                                                                                                                                                                                                                                                                                                                                                                                                                                                                                                                                                                                                                                                                                             |

1  
2  
3  
4  
5  
6  
7  
8  
9  
10  
11  
12  
13  
14  
15  
16  
17  
18  
19  
20  
21  
22  
23  
24  
25  
26  
27  
28  
29  
30  
31  
32  
33  
34  
35  
36  
37  
38  
39  
40  
41  
42  
43  
44  
45  
46  
47  
48  
49  
50  
51  
52  
53  
54  
55  
56  
57  
58  
59  
60

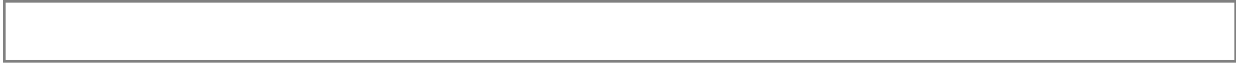

SCHOLARONE™  
Manuscripts



I, the Submitting Author has the right to grant and does grant on behalf of all authors of the Work (as defined in the below author licence), an exclusive licence and/or a non-exclusive licence for contributions from authors who are: i) UK Crown employees; ii) where BMJ has agreed a CC-BY licence shall apply, and/or iii) in accordance with the terms applicable for US Federal Government officers or employees acting as part of their official duties; on a worldwide, perpetual, irrevocable, royalty-free basis to BMJ Publishing Group Ltd ("BMJ") its licensees and where the relevant Journal is co-owned by BMJ to the co-owners of the Journal, to publish the Work in this journal and any other BMJ products and to exploit all rights, as set out in our [licence](#).

The Submitting Author accepts and understands that any supply made under these terms is made by BMJ to the Submitting Author unless you are acting as an employee on behalf of your employer or a postgraduate student of an affiliated institution which is paying any applicable article publishing charge ("APC") for Open Access articles. Where the Submitting Author wishes to make the Work available on an Open Access basis (and intends to pay the relevant APC), the terms of reuse of such Open Access shall be governed by a Creative Commons licence – details of these licences and which [Creative Commons](#) licence will apply to this Work are set out in our licence referred to above.

Other than as permitted in any relevant BMJ Author's Self Archiving Policies, I confirm this Work has not been accepted for publication elsewhere, is not being considered for publication elsewhere and does not duplicate material already published. I confirm all authors consent to publication of this Work and authorise the granting of this licence.

## Self-reported health without clinically measurable benefits among adult users of multivitamin and multimineral supplements: a cross-sectional study

Manish D. Paranjpe<sup>1+\*</sup>; Alfred C. Chin<sup>2+</sup>; Ishan Paranjpe<sup>3</sup>; Nicholas J. Reid<sup>4</sup>; Phan Q. Duy<sup>5</sup>; Jason K. Wang<sup>1</sup>; Ross O'Hagan<sup>3</sup>; Artine Arzani<sup>6</sup>; Arsalan Haghdel<sup>6</sup>; Clarence C. Lim<sup>7</sup>; Vwaire Orhurhu<sup>4,8</sup>; Ivan Urits<sup>4,8</sup>; Anh L. Ngo<sup>4,9</sup>; Benjamin S. Glicksberg<sup>3</sup>; Kathryn T. Hall<sup>10,11</sup>; Darshan H. Mehta<sup>12,13</sup>; Richard S. Cooper<sup>14</sup>; Girish N. Nadkarni<sup>3\*</sup>

1. Harvard-MIT Program in Health Sciences and Technology, Harvard Medical School, Boston, MA
2. Weill Cornell/Rockefeller/Sloan Kettering Tri-Institutional MD-PhD Program, New York, NY
3. Charles Bronfman Institute for Personalized Medicine, Icahn School of Medicine at Mount Sinai, New York, NY
4. Harvard Medical School, Boston, MA
5. Medical Scientist Training Program, Yale University School of Medicine, New Haven, CT
6. Weill Cornell Medical College, New York, NY
7. Texas A&M Health Science Center College of Medicine, College Station, TX
8. Department of Anesthesia, Critical Care and Pain Medicine, Massachusetts General Hospital, Boston, MA
9. Department of Anesthesia, Critical Care, and Pain Medicine, Beth Israel Deaconess Medical Center, Boston, MA
10. Division of Preventive Medicine, Brigham and Women's Hospital, Boston, MA
11. Program in Placebo Studies, Beth Israel Deaconess Medical Center, Boston, MA
12. Osher Center for Integrative Medicine, Brigham & Women's Hospital, and Harvard Medical School, Boston, MA
13. Benson-Henry Institute for Mind Body Medicine, Massachusetts General Hospital, Boston, MA
14. Loyola University Medical Center, Chicago, IL

+ These authors contributed equally to the study

\* To whom correspondence should be addressed

**Corresponding author:** Manish D. Paranjpe, Harvard-MIT Health Sciences and Technology Program, Harvard Medical School, 25 Shattuck Street, Boston MA, 02115  
(manish\_paranjpe@hms.harvard.edu)

**Word Count:** 3,158

## ABSTRACT

**Objectives:** Multiple clinical trials fail to identify clinically measurable health benefits of daily multivitamin and multi-mineral (MVM) consumption in the general adult population.

Understanding the determinants of widespread use of MVMs may guide efforts to better educate the public about effective nutritional practices. The objective of this study was to compare self-reported and clinically measurable health outcomes among MVM users and non-users in a large, nationally representative sample of adult civilian non-institutionalized population of the US surveyed on the use of complementary health practices.

**Design:** Cross-sectional analysis of the effect of MVM consumption on self-reported overall health and clinically measurable health outcomes.

**Participants:** Adult MVM users and non-users from the 2012 National Health Interview Survey (n=21,603).

**Primary and secondary outcome measures:** Five psychological, physical, and functional health outcomes 1) self-rated health status, 2) needing help with routine needs, 3) history of 10 chronic diseases, 4) presence of 19 health conditions in the past 12 months, and 5) Kessler 6-Item (K6) Psychological Distress Scale to measure nonspecific psychological distress in the past month.

**Results:** Among 4,933 adult MVM users and 16,670 adult non-users, MVM users self-reported 30% better overall health than non-users (Adjusted OR: 1.31; 95% CI: 1.17-1.46 FDR-adjusted  $P < .001$ ). There were no differences between MVM users and non-users in history of 10 chronic diseases, number of present health conditions, severity of current psychological distress on the K6 scale and rates of needing help with daily activities. No effect modification was observed after stratification by sex, education, and race.

1  
2  
3 **Conclusions:** MVM users self-reported better overall health despite no apparent differences in  
4 clinically measurable health outcomes. These results suggest that widespread use multivitamins  
5 in adults may be a result of individuals' positive expectation that multivitamin use leads to better  
6 health outcomes or a self-selection bias in which MVM users intrinsically harbor more positive  
7 views regarding their health.  
8  
9  
10  
11  
12  
13  
14  
15

## 16 **STRENGTHS AND LIMITATIONS OF THE STUDY**

- 17 - This is the first study to link increased self-reported health, absence of clinically  
18 measurable benefits, and multivitamin and multimineral supplement use in the same  
19 population  
20  
21  
22  
23  
24
- 25 - Data are derived from a large, national survey across the US  
26
- 27 - Results have broad implications for public health and the multibillion-dollar supplement  
28 industry  
29  
30
- 31 - Cross-sectional study design precludes the demonstration of a causal relationship  
32 between self-reported health and multivitamin and multimineral supplements  
33  
34  
35
- 36 - Self-reported health can be inherently biased and confounding  
37  
38  
39  
40  
41  
42  
43  
44  
45  
46  
47  
48  
49  
50  
51  
52  
53  
54  
55  
56  
57  
58  
59  
60



## INTRODUCTION

Consumption of multivitamins (MVs) and multi-minerals (MMs) (together: MVMs) as dietary supplements is widespread in the general US adult population, with some reports estimating 33% of Americans regularly take MVMs<sup>1-4</sup>. While MVM supplementation is warranted for some individuals at high-risk because of disease-related deficiency<sup>5</sup>, the consumption of non-prescription, over-the-counter MVMs has not produced robust evidence for the wide-ranging health benefits expected by the general adult population. Likewise, large randomized clinical trials that evaluate MVM at different doses, across both men and women at varied ages, have failed to demonstrate benefit in prevention of chronic diseases. The Physicians' Health Study II (PHS II), a randomized placebo-controlled clinical trial of low-dose daily MVM use in older male physicians, found no reduction in major CVD events, myocardial infarction, stroke, and CVD mortality<sup>6</sup>, and these results were independent of baseline nutritional status<sup>7</sup>. A prospective cohort study of middle-aged and elderly women also indicated no effect of MVM use for the same CVD outcomes in PHS II<sup>8</sup>. The SU.VI.MAX Study, a clinical trial of antioxidative MVMs in adults, found no effect on incidence of ischemic CVD<sup>9</sup>, and high-dose MVMs did not reduce CVD events<sup>10</sup>. Meta-analysis of these and other studies (N=18) found no improvement in CVD outcomes in the general population<sup>11</sup>. Based on these studies, the US Preventative Services Task Force does not recommend MVM use for the prevention of CVD<sup>12,13</sup>.

Data on the effect of MVM consumption on cognitive function in adults are also inconclusive. While results from PHS II found that long-term use of daily MVs did not provide cognitive benefits in men<sup>14</sup>, a meta-analysis on 10 studies concluded that MVs selectively enhanced free recall memory but no other cognitive functions<sup>15</sup>. Intriguingly, nine weeks of MVM use appears to improve multi-tasking and cognitive function during fatigue in women<sup>16</sup>.

1  
2  
3 With regard to cancer, PHS II demonstrated moderately reduced all-cancer risk in men  
4 consuming MVs<sup>17</sup> while data from the Women's Health Initiative Clinical Trials revealed no  
5 association<sup>18</sup>. Some studies even link MVM use with increased cancer risk – a prospective cohort  
6 study of Swedish women found increased breast cancer risk associated with MVM use<sup>19</sup>.  
7  
8  
9

10  
11  
12 The association of MVM use with all-cause mortality, like CVD, is null. While data from  
13 the Multiethnic Cohort Study cohort study indicated no association between MVM use and all-  
14 cause mortality,<sup>20</sup> the Cancer Prevention Study (II) reported a five percent higher rate of all-  
15 cause death among men using MVs<sup>21</sup> and The Iowa Women's Health Study identified an  
16 association between MVM use and increased total mortality risk<sup>22</sup>. A meta-analysis of these and  
17 other randomized trials (N=21) demonstrated no effect of MVM use on mortality risk<sup>23</sup>.  
18  
19  
20  
21  
22  
23  
24  
25

26 While numerous reports on MVM consumption establish the lack of broad-spectrum,  
27 clinically measurable health benefits, the determinants of widespread MVM use by the general  
28 population are not well understood. That the majority (52%) of MVM users report using MVMs  
29 in an effort to prevent disease is even more puzzling in light of the paucity of randomized and  
30 observation data showing a positive health benefit of MVMs<sup>24</sup>. Because nutritional supplements  
31 constitute a multibillion-dollar industry and can even be harmful when taken in excess<sup>25</sup>,  
32 understanding the determinants of widespread MVM use has significant medical and financial  
33 consequences. Moreover, it is unclear whether MVM users, despite not being physiologically  
34 different from non-users, simply believe they are healthier. To address this question, we utilized  
35 data from the 2012 National Health Interview Survey<sup>26</sup> (NHIS), which included a  
36 complementary and alternative (CAM) questionnaire comprising of 21,603 participants across  
37 the US.  
38  
39  
40  
41  
42  
43  
44  
45  
46  
47  
48  
49  
50  
51  
52  
53  
54  
55  
56  
57  
58  
59  
60

## METHODS

### Data source

All data was obtained from the 2012 The National Health Interview Survey (NHIS), a nationally representative health survey conducted annually among civilian and noninstitutionalized US participants by the Centers for Disease Control (CDC). All data was publicly available and did not require institutional review board approval. The 2012 NHIS was comprised of a core questionnaire on health information administered to each selected household member. A randomly selected adult in each household was administered a more detailed health survey which included questions on access to care, specific health conditions and use of CAM(2012 only). In 2012, 77.6% of households completed the survey and 79.7% of adults selected completed the detailed survey<sup>26</sup>.

### Health Status and Health Outcome Measures

We obtained data on adults (age  $\geq 18$  years) derived from the Sample Adult Component who also participated in the Adult CAM File. This file surveys use of alternative medicines and therapies including daily MVM consumption, yoga, and meditation. Consistent with previous NHIS studies<sup>27</sup>, we considered five psychological, physical, and functional health outcomes from questions in the Sample Adult Component: 1) self-rated health status (poor/fair vs. excellent/very good/good), 2) needing help with routine needs such as eating (yes or no), 3) history of ten chronic diseases (cancer, hypertension, coronary heart disease, stroke, chronic obstructive pulmonary disease, asthma, diabetes, arthritis, hepatitis, and weak/failing kidneys), 4) presence of 19 health conditions in the past 12 months (digestive, skin, and other allergy, acid reflux, hay

1  
2  
3 fever, chest cold, nausea and vomiting, sore throat, infectious disease, recurring headache,  
4  
5 memory loss, neurological problems, sprains, and abdominal, dental, muscle/bone, chronic, and  
6  
7 skin pain), and 5) Kessler 6-Item (K6) Psychological Distress Scale<sup>28</sup> score to measure  
8  
9 nonspecific psychological distress in the past month. Participants who refused to answer or did  
10  
11 not know the answers to at least one of these questions were excluded from the study.  
12  
13

14  
15 Participants were classified as MVM users or non-users from their response to the question  
16  
17 “During the past 12 months, did take multi-vitamins or multi-minerals?” in the Adult CAM File.  
18  
19 Participants who refused to answer or did not know their MVM use in the past 12 months were  
20  
21 excluded from analyses.  
22  
23

## 24 25 26 **Statistical Analysis**

27  
28 For each outcome, the relationship between MVM use in the past year and health  
29  
30 outcome was estimated using a logistic regression model adjusting for age, sex, race, region,  
31  
32 education, income, employment status, health insurance status, presence of child in household,  
33  
34 marital status, unmet medical care due to cost in the past year, and not seeing a health  
35  
36 professional in office in the past two weeks. Multinomial logistic regression was used for  
37  
38 outcomes with more than two levels (e.g., number of chronic diseases, number of diseases in the  
39  
40 past 12 months, Kessler-6 Item score). Binary logistic regression was used for outcomes with  
41  
42 two levels (self-reported health and needing help with daily routines such as eating). Standard  
43  
44 errors were estimated using weights provided by NHIS to account for the complex survey design  
45  
46 and produce nationally representative estimates. A multiple imputation strategy was used to  
47  
48 estimate income in cases of missing responses to income as recommended by the National  
49  
50 Center for Health Statistics<sup>29</sup>. All analyses were conducted using R (v3.5.1). *P* values were  
51  
52  
53  
54  
55  
56  
57  
58  
59  
60

1  
2  
3 adjusted for multiple comparisons using a Benjamini-Hochberg procedure with  $FDR < 0.01$   
4  
5 deemed significant.  
6

7  
8 Stratified analyses were conducted in age- (18-44 years, 45-64 years and 65+ years),  
9  
10 race- (white and non-white), sex- (female and male), family income- (<100%, 100%-199%,  
11  
12 200%-299%, 300-399%, and 400% relative to the federal poverty level), education level- (did  
13  
14 not graduate high school, high school graduate, college graduate or higher) stratified groups to  
15  
16 assess the association between MVM use and self-reported health in sociodemographic  
17  
18 subgroups. In addition to stratified analyses, statistical interaction effects between MVM use  
19  
20 and demographic variable (age, race, sex, family income, and education) on self-reported health  
21  
22 was assessed using a multivariate regression model.  
23  
24  
25  
26  
27

## 28 **Patients and Public Involvement**

29  
30 Patients and the public were not involved in this study, including data collection, analysis and  
31  
32 interpretation.  
33  
34  
35  
36

## 37 **RESULTS**

### 38 **Study Cohort Characteristics**

39  
40 Sociodemographic differences between MVM users and non-users are presented in Table  
41  
42  
43 1. Our study included 4,933 MVM users and 16,670 non-users (Table 1). As previously reported  
44  
45 in data from the 2007-2010 and 2010-2014 National Health and Nutrition Examination Surveys  
46  
47 (NHANES)<sup>30,31</sup>, compared to non-users, MVM users were significantly older, earned more  
48  
49 income, more likely to be female, more likely to be a college graduate, more likely to be married,  
50  
51 and more likely to have health insurance. Unlike in previous studies, compared to MVM non-  
52  
53  
54  
55  
56  
57  
58  
59  
60

1  
2  
3 users, MVM users were less likely to be unemployed, have a minor child in their household, and  
4  
5 not have an office visit for healthcare in the past two weeks (Table 1). We observed no  
6  
7 significant differences in percent of non-English speaking interviews and percent having  
8  
9 foregone medical care due to cost in the past year between MVM users and non-users (Table 1).

### 11 **Association between MVM usage and Health Status and Health Outcomes**

12  
13  
14 Differences in health status and health outcomes between MVM users and non-users are  
15  
16 displayed in Table 2. Multivariate regression revealed that MVM users self-reported 30% better  
17  
18 overall health than non-users (OR: 1.31, 95% CI: 1.17-1.46, FDR-adjusted  $P < .001$  ; Table 2).  
19  
20 Strikingly, MVM users and non-users did not differ in history of 10 chronic disease (MVM users  
21  
22 mean 1.09 conditions, 95% CI: 1.06-1.11 vs non-users mean: 1.07, 95% CI: 1.03-1.11) number  
23  
24 of present health conditions (MVM users mean: 2.7 conditions, 95% CI: 2.7-2.8 vs non-users  
25  
26 mean: 2.8, 95% CI: 2.7-2.9), severity of psychological distress on the K6 scale (MVM users  
27  
28 mean K6 score = 2.3, 95% CI: 2.3-2.4 vs non-users mean = 2.5, 95% CI: 2.4-2.6), and needing  
29  
30 help with daily activities (OR: 0.86, 95% CI: 0.71-1.04).  
31  
32  
33  
34  
35  
36  
37

### 38 **Stratified Analyses: Association between MVM Usage and Self-Reported Overall Health in** 39 **Sociodemographic Subgroups**

40  
41  
42 Table 3 reports the association between MVM usage and self-reported overall health in  
43  
44 age, race, sex, income, and education-stratified subgroups (Table 3). MVM use was associated  
45  
46 with better self-reported health in the 18-44-year (OR: 1.26, 95% CI: 1.00-1.61) and 45-64-year  
47  
48 groups (OR: 1.30, 95% CI: 1.08-1.57) and near significant among respondents  $\geq 65$  years (OR:  
49  
50 1.20, 95% CI: 0.95-1.52, FDR  $P$  value = 0.06) (Table 3). MVM use was associated with better  
51  
52 self-reported health amongst both white (OR: 1.34, 95% CI: 1.07-1.67) and non-white (OR: 1.26;  
53  
54  
55  
56  
57  
58  
59  
60

1  
2  
3 95% CI: 1.09-1.45) respondents (Table 3). MVM use was associated with better self-reported  
4 health in both male (OR: 1.33, 95% CI: 1.10-1.63) and female (OR: 1.22, 95% CI: 1.05-1.41)  
5 respondents (Table 3). Interestingly, MVM use was associated with better self-reported health in  
6 families with income < 100% of the federal poverty level (FPL) (OR: 1.42, 95% CI: 1.12-1.80),  
7 100%-199% FPL (OR: 1.37, 95% CI: 1.10-1.69) and 200%-299% FPL (OR: 1.32, 95% CI: 1.01-  
8 1.72) but not in families whose income was 300%-399% FPL (OR: 1.32, 95% CI: 0.88-1.98) or  
9  $\geq$ 400% FPL (OR: 1.15, 95% CI: 0.85-1.56) (Table 3). MVM use was associated with better self-  
10 reported health in all education subgroups analyzed, including respondents that did not complete  
11 high school (OR: 1.38, 95% CI: 1.06-1.81), high school graduates (OR: 1.21, 95% CI: 1.04-  
12 1.41), and college graduates (OR: 1.37, 95% CI: 1.00-1.88) (Table 3). All stratified analyses  
13 were conducted after adjusting for the potential confounding effects of age, sex, race, region,  
14 education, income, employment status, health insurance status, presence of child in household,  
15 marital status, unmet medical care due to cost in the past year, and not seeing a health  
16 professional in office in the past two weeks. The variable of stratification was not included as a  
17 covariate.

18  
19  
20  
21  
22  
23  
24  
25  
26  
27  
28  
29  
30  
31  
32  
33  
34  
35  
36  
37  
38 Statistical interaction effects between MVM use and demographic variables (age, race,  
39 family income, and education) on self-reported overall health was assessed through a  
40 multivariate regression model in Table S1. We observed no significant association between  
41 MVM use and age, MVM use and race, MVM use and family income, and MVM use and  
42 education on self-reported overall income (Table S1).  
43  
44  
45  
46  
47  
48  
49  
50  
51  
52  
53  
54  
55  
56  
57  
58  
59  
60

## DISCUSSION

This present study is the first to simultaneously analyze the association between MVM use and both self-reported health and clinical health outcomes. In this work, we found that MVM users self-report 30% better overall health than non-users despite no clinically assessed differences in health. Our finding that MVM users and non-users do not differ in various psychological, physical, and functional outcomes corroborates previous reports that MVMs do not improve overall health in the general adult population<sup>5-22</sup>. Our stratified analysis revealed that MVM use is associated with better self-reported overall health across all race, sex, and education groups, and in individuals under 65 and with family incomes below 300% FPL. The lack of association between MVM usage and self-reported health in individuals with family income greater than 300% FPL may be related to sample size and should be replicated in a follow up study. Taken together, these findings help elucidate explanations underlying widespread MVM usage despite no generalized clinical benefits.

The results here suggest two potential explanations underlying widespread MVM consumption in the absence of clinically measurable benefits: 1) MVM users believe in the efficacy of MVMs by harboring a positive expectation regarding the health benefits of MVMs and/or 2) MVM users intrinsically harbor a more positive outlook on their personal health regardless of MVM usage. A growing body of evidence suggests that positive expectation influence treatment outcomes for diseases including heart disease<sup>32-35</sup>, cancer<sup>36,37</sup>, musculoskeletal disorders<sup>38,39</sup>, injuries<sup>40,41</sup>, and obesity<sup>42-44</sup>. Under a positive expectation model, MVM users are more likely to harbor a positive expectation regarding the clinical efficacy of MVMs and thus more likely to self-report as having excellent or good overall health. In the case of MVM usage, it is interesting that the presence of positive expectation did not influence



1  
2  
3 clinically measurable health outcomes, unlike in other treatments. The effect of positive  
4 expectations in the MVM user community is made even more stronger when one considers that  
5  
6 the majority of MVM and supplements are sold to the so-called “worried-well” population<sup>45</sup> who  
7  
8 may assign greater weight to the purported health benefits of dietary supplements and alternative  
9  
10 therapies. It is possible that members of this population are more susceptible to positive  
11  
12 expectations and may thereby continue to use MVMs in the absence of clinical benefits.  
13  
14  
15

16  
17 The second mechanism, in which MVM users intrinsically harbor greater positive views  
18  
19 about their health, may be explained in part by certain combinations of sociodemographic  
20  
21 determinants that influence self-reported health. While age, sex, income, education, and location  
22  
23 of residence have been previously shown to affect self-reported health in diverse populations<sup>46–</sup>  
24  
25 <sup>48</sup>, combinations of other characteristics may also cause MVM users to harbor intrinsically more  
26  
27 positive views regarding their health in the absence of clinical differences. Further research is  
28  
29 necessary to elucidate these characteristics.  
30  
31  
32

33  
34 Our results are consistent with existing work from two studies: the first being a 2013  
35  
36 study involving 11,956 adults from the 2007-2010 NHANES that demonstrated MVM users  
37  
38 exhibit greater self-reported health than non-users<sup>31</sup>, and second, a 2014 study involving 5536  
39  
40 Coast Guard and military study which found that MVM users were significantly more likely to  
41  
42 self-report their general health as excellent or good<sup>49</sup>. While informative, these previous studies  
43  
44 only focused on self-reported health as an outcome. In the present study, we considered self-  
45  
46 reported health in addition to clinically measurable health outcomes. This is an important  
47  
48 distinction in order to establish that MVM users experience greater self-reported health in the  
49  
50 absence of clinically measurable health improvement. Nevertheless, it is encouraging that our  
51  
52  
53  
54  
55  
56  
57  
58  
59  
60

1  
2  
3 results are consistent across the NHANES, military and Coast Guard and NHIS study cohorts,  
4  
5 and robust to different statistical analysis methodologies.  
6

7  
8         Limitations of this study include the cross-sectional design, reliability of self-reported  
9  
10 health within NHIS, income estimation using multiple imputation, indication bias and  
11  
12 nonresponse bias. First, the cross-sectional study design prevents a demonstration of causal  
13  
14 relationship between MVM use and self-reported health. The lack of longitudinal data available  
15  
16 to assess changes in self-reported health before and after MVM supplementation prevents us  
17  
18 from differentiating the two aforementioned explanations that may contribute to widespread  
19  
20 MVM use. Second, self-reported health within the NHIS may inherently harbor reporting bias  
21  
22 and residual confounding. In addition to reporting bias and residual confounding, a self-reported  
23  
24 binary response to the question of whether one has taken MVMs in the past 12 months precludes  
25  
26 any analysis of dose-dependent effects of MVMs in our cohort. This is especially important  
27  
28 considering some vitamins and minerals have known U-shaped associations with disease in  
29  
30 which disease risk is elevated at both high and low vitamin and mineral levels<sup>50-53</sup>. Further, use  
31  
32 of both multivitamins and multiminerals were asked together as part of the same question in the  
33  
34 NHIS questionnaire. This prevented us from analyzing multivitamin and multimineral effects in  
35  
36 isolation. Moreover, different MVM preparations can differ in their nutritional composition,  
37  
38 quality, and bioavailability. Some individuals may take multiple MVMs whose constituents  
39  
40 could interact with each other. [Because the brand of multivitamin being taken was not asked of](#)  
41  
42 [MVM users in NHIS](#), we could not identify differences in nutritional composition, quality,  
43  
44 bioavailability, and chemical interaction that may be driving the results in this study.  
45  
46  
47  
48  
49  
50

51         Third, despite being recommended by the NHIS<sup>29</sup>, the multiple imputation technique  
52  
53 used to calculate income in cases in which data was missing may generate estimation errors.  
54  
55  
56  
57  
58  
59  
60

1  
2  
3 Another limitation to the income-stratified results for self-reported overall health may stem from  
4 the inability to factor income mobility. Interestingly, it has been previously demonstrated that  
5 while high incomes are associated with longer life expectancies, accounting for income mobility  
6 reduces the gap by approximately 50%<sup>54</sup>.  
7  
8  
9  
10

11  
12 A portion of our cohort may have been prescribed MVMs, specific vitamins or specific  
13 minerals for indications including micronutrient deficiency, pregnancy, iron deficiency anemia,  
14 osteoporosis, Crohn's disease and others, thereby contributing to indication bias<sup>55-60</sup>. Previous  
15 estimates have suggested approximately 1% of physician office visits in the United States  
16 include a prescription or recommendation for MVMs<sup>61</sup>. One can imagine a scenario in which  
17 MVM users and non-users are imbalanced in the proportion of medical cases that require MVM  
18 supplementation (ie. micronutrient deficiency or pregnancy). In such a scenario, it may falsely  
19 appear that MVM use is not associated with clinical benefits. In the present study, owing to a  
20 lack of information regarding the reason for taking MVMs, we were unable to fully account for  
21 indication bias present in our cohort.  
22  
23  
24  
25  
26  
27  
28  
29  
30  
31  
32  
33  
34

35 In addition to indication bias, the NHIS, like other surveys, is known to suffer from  
36 nonresponse bias<sup>62</sup>. For example, a previous study found that the 1990-2009 NHIS population  
37 had an approximately 14% lower mortality than the general population<sup>62</sup>. Post-hoc methods to  
38 address nonresponse bias include creating sample weights based on demographic variables and  
39 selection probabilities, as was used in the present study. However, survey weighting, while a  
40 standard practice, may not fully account for nonresponse bias, especially if the survey weights do  
41 not take into account common differences between survey responders and non-responders such  
42 as smoking and alcohol use<sup>63</sup>. As a result, non-response bias may limit the generalizability of our  
43 results to the broader population.  
44  
45  
46  
47  
48  
49  
50  
51  
52  
53  
54  
55  
56  
57  
58  
59  
60

## Conclusions

Using nationally representative survey data on health outcomes, our study reveals that MVM users self-report better overall health than non-users despite not exhibiting improved health by clinically measurable standards. Furthermore, we identify specific sociodemographic subgroups of MVM users that are more prone to this behavior. The multibillion-dollar nature of the nutritional supplement industry makes understanding the determinants of widespread MVM have significant medical and financial consequences. Our findings suggest that widespread use multivitamins in adults may be a result of individuals' positive expectation that multivitamin use leads to better health outcomes or a self-selection bias in which MVM users intrinsically harbor more positive views regarding their health.

## CONTRIBUTORS

MDP and ACC conceived and designed the study. MDP extracted data from NHANES. MDP, ACC, IP, PQD, JKW, RO, NJR, AA, AH, CCL, VO, IU, ALN, BSG, KTH, DHM, and GNN analyzed the data. MDP, ACC, KTH, and DHM wrote the manuscript. MDP, ACC, KTH, DHM, GNN, and RSC critically revised the manuscript for important intellectual content. All authors commented and approved the manuscript.

## FUNDING

ACC and PQD were supported by NIH Medical Scientist Training Program Training Grants T32GM007739 and T32GM007205 respectively.

## COMPETING INTERESTS

None declared.

## PATIENT CONSENT

None required.

## ETHICS APPROVAL

None required.

## DATA SHARING

All data used in the study is publicly available from the National Health Interview Survey.

## REFERENCES

1. Kantor ED, Rehm CD, Du M, White E, Giovannucci EL. Trends in dietary supplement use among US adults from 1999-2012. *JAMA - J Am Med Assoc.* 2016. doi:10.1001/jama.2016.14403
2. Bailey RL, Gahche JJ, Lentino C V, et al. Dietary supplement use in the United States, 2003-2006. *J Nutr.* 2011. doi:10.3945/jn.110.133025
3. Radimer K, Bindewald B, Hughes J, Ervin B, Swanson C, Picciano MF. Dietary supplement use by US adults: Data from the National Health and Nutrition Examination Survey, 1999-2000. *Am J Epidemiol.* 2004. doi:10.1093/aje/kwh207
4. Gahche J, Bailey R, Burt V, et al. Dietary supplement use among U.S. adults has increased since NHANES III (1988-1994). *NCHS Data Brief.* 2011.
5. Manson JAE, Bassuk SS. Vitamin and mineral supplements what clinicians need to know. *JAMA - J Am Med Assoc.* 2018. doi:10.1001/jama.2017.21012
6. Sesso HD, Christen WG, Bubes V, et al. Multivitamins in the prevention of cardiovascular disease in men: The physicians' health study II randomized controlled trial. *JAMA - J Am Med Assoc.* 2012. doi:10.1001/jama.2012.14805
7. Rautiainen S, Gaziano JM, Christen WG, et al. Effect of Baseline Nutritional Status on Long-term Multivitamin Use and Cardiovascular Disease Risk. *JAMA Cardiol.* 2017.

- 1  
2  
3 doi:10.1001/jamacardio.2017.0176  
4  
5  
6 8. Rautiainen S, Lee IM, Rist PM, et al. Multivitamin use and cardiovascular disease in a  
7  
8 prospective study of women. *Am J Clin Nutr.* 2015. doi:10.3945/ajcn.114.088310  
9  
10 9. Herberg S, Galan P, Preziosi P, et al. The SU.VI.MAX study: A randomized, placebo-  
11  
12 controlled trial of the health effects of antioxidant vitamins and minerals. *Arch Intern*  
13  
14 *Med.* 2004. doi:10.1001/archinte.164.21.2335  
15  
16  
17 10. Lamas GA, Boineau R, Goertz C, et al. Oral High-Dose Multivitamin and Minerals After  
18  
19 Myocardial Infarction. *Ann Intern Med.* 2013. doi:10.7326/0003-4819-159-12-  
20  
21 201312170-00004  
22  
23  
24 11. Kim J, Choi J, Kwon SY, et al. Association of multivitamin and mineral supplementation  
25  
26 and risk of cardiovascular disease: A systematic review and meta-analysis. *Circ*  
27  
28 *Cardiovasc Qual Outcomes.* 2018. doi:10.1161/CIRCOUTCOMES.117.004224  
29  
30  
31 12. Moyer VA. Vitamin, mineral, and multivitamin supplements for the primary prevention of  
32  
33 cardiovascular disease and cancer: U.S. preventive services task force recommendation  
34  
35 statement. *Ann Intern Med.* 2014. doi:10.7326/M14-0198  
36  
37  
38 13. Fortmann SP, Burda BU, Senger CA, et al. Vitamin, Mineral, and Multivitamin  
39  
40 Supplements for the Primary Prevention of Cardiovascular Disease and Cancer: A  
41  
42 Systematic Evidence Review for the U.S. Preventive Services Task Force. *Evid Rep.*  
43  
44 2013. doi:10.7326/0003-4819-159-12-201312170-00729  
45  
46  
47 14. Grodstein F, O'Brien J, Kang JH, et al. Long-term multivitamin supplementation and  
48  
49 cognitive function in men: A randomized trial. *Ann Intern Med.* 2013.  
50  
51  
52 15. Grima NA, Pase MP, MacPherson H, Pipingas A. The effects of multivitamins on  
53  
54 cognitive performance: A systematic review and meta-analysis. *J Alzheimer's Dis.* 2012.  
55  
56  
57  
58  
59

- 1  
2  
3 doi:10.3233/JAD-2011-111751  
4  
5  
6 16. Haskell CF, Robertson B, Jones E, et al. Effects of a multi-vitamin/mineral supplement on  
7  
8 cognitive function and fatigue during extended multi-tasking. *Hum Psychopharmacol*.  
9  
10 2010. doi:10.1002/hup.1144  
11  
12 17. Gaziano JM, Sesso HD, Christen WG, et al. Multivitamins in the prevention of cancer in  
13  
14 men: The physicians' health study II randomized controlled trial. *JAMA - J Am Med*  
15  
16 *Assoc*. 2012. doi:10.1001/jama.2012.14641  
17  
18 18. Neuhouser ML, Wassertheil-Smoller S, Thomson C, et al. Multivitamin use and risk of  
19  
20 cancer and cardiovascular disease in the women's health initiative cohorts. *Arch Intern*  
21  
22 *Med*. 2009. doi:10.1001/archinternmed.2008.540  
23  
24  
25 19. Larsson SC, Åkesson A, Bergkvist L, Wolk A. Multivitamin use and breast cancer  
26  
27 incidence in a prospective cohort of Swedish women. *Am J Clin Nutr*. 2010.  
28  
29 doi:10.3945/ajcn.2009.28837  
30  
31  
32 20. Park S-Y, Murphy SP, Wilkens LR, Henderson BE, Kolonel LN. Multivitamin Use and  
33  
34 the Risk of Mortality and Cancer Incidence: The Multiethnic Cohort Study. *Am J*  
35  
36 *Epidemiol*. 2011. doi:10.1093/aje/kwq447  
37  
38  
39 21. Watkins ML, Erickson JD, Thun MJ, Mulinare J, Heath CW. Multivitamin use and  
40  
41 mortality in a large prospective study. *Am J Epidemiol*. 2000. doi:10.1093/aje/152.2.149  
42  
43  
44 22. Mursu J, Robien K, Harnack LJ, Park K, Jacobs DR. Dietary supplements and mortality  
45  
46 rate in older women: The Iowa women's health study. *Arch Intern Med*. 2011.  
47  
48 doi:10.1001/archinternmed.2011.445  
49  
50  
51 23. Macpherson H, Pipingas A, Pase MP. Multivitamin-multimineral supplementation and  
52  
53 mortality: A meta-analysis of randomized controlled trials. *Am J Clin Nutr*. 2013.  
54  
55  
56  
57  
58  
59  
60

- 1  
2  
3 doi:10.3945/ajcn.112.049304  
4  
5  
6 24. McGinnis JM, Birt DF, Brannon PM, et al. National Institutes of Health state-of-the-  
7  
8 science conference statement: Multivitamin/mineral supplements and chronic disease  
9  
10 prevention. In: *Annals of Internal Medicine*. Vol 145. American College of Physicians;  
11  
12 2006:364-371. doi:10.7326/0003-4819-145-5-200609050-00136  
13  
14  
15 25. Geller AI, Shehab N, Weidle NJ, et al. Emergency department visits for adverse events  
16  
17 related to dietary supplements. *N Engl J Med*. 2015. doi:10.1056/NEJMsa1504267  
18  
19  
20 26. 2012 NHIS Survey Description.  
21  
22 [https://ftp.cdc.gov/pub/health\\_statistics/nchs/dataset\\_documentation/NHIS/2012/srvydesc.](https://ftp.cdc.gov/pub/health_statistics/nchs/dataset_documentation/NHIS/2012/srvydesc.pdf)  
23  
24 pdf. Published 2012. Accessed April 24, 2019.  
25  
26  
27 27. Gonzales G, Przedworski J, Henning-Smith C. Comparison of health and health risk  
28  
29 factors between lesbian, gay, and bisexual adults and heterosexual adults in the United  
30  
31 States: Results from the national health interview survey. *JAMA Intern Med*. 2016.  
32  
33 doi:10.1001/jamainternmed.2016.3432  
34  
35  
36 28. Kessler RC, Barker PR, Colpe LJ, et al. Screening for serious mental illness in the general  
37  
38 population. *Arch Gen Psychiatry*. 2003. doi:10.1001/archpsyc.60.2.184  
39  
40  
41 29. Center for Health Statistics - Division of Health Interview Statistics N. *Multiple*  
42  
43 *Imputation of Family Income and Personal Earnings in the National Health Interview*  
44  
45 *Survey: Methods and Examples*; 2013. <https://www.cdc.gov/nchs/data/nhis/tecdoc13.pdf>.  
46  
47 Accessed July 8, 2019.  
48  
49  
50 30. Cowan AE, Jun S, Gahche JJ, et al. Dietary supplement use differs by socioeconomic and  
51  
52 health-related characteristics among U.S. adults, NHANES 2011–2014. *Nutrients*. 2018.  
53  
54 doi:10.3390/nu10081114  
55  
56  
57  
58  
59  
60



- 1  
2  
3 31. Bailey RL, Gahche JJ, Miller PE, Thomas PR, Dwyer JT. Why US adults use dietary  
4 supplements. *JAMA Intern Med.* 2013. doi:10.1001/jamainternmed.2013.2299  
5  
6
- 7  
8 32. Petrie KJ, Weinman J, Sharpe N, Buckley J. Role of patients' view of their illness in  
9 predicting return to work and functioning after myocardial infarction: Longitudinal study.  
10  
11 *Br Med J.* 1996. doi:10.1136/bmj.312.7040.1191  
12  
13
- 14  
15 33. Juergens MC, Seekatz B, Moosdorf RG, Petrie KJ, Rief W. Illness beliefs before cardiac  
16 surgery predict disability, quality of life, and depression 3 months later. *J Psychosom Res.*  
17  
18 2010. doi:10.1016/j.jpsychores.2009.10.004  
19  
20
- 21  
22 34. Barefoot JC, Brummett BH, Williams RB, et al. Recovery expectations and long-term  
23 prognosis of patients with coronary heart disease. *Arch Intern Med.* 2011.  
24  
25 doi:10.1001/archinternmed.2011.41  
26  
27
- 28  
29 35. Habibović M, Pedersen SS, Van Den Broek KC, Denollet J. Monitoring treatment  
30 expectations in patients with an implantable cardioverter-defibrillator using the EXPECT-  
31  
32 ICD scale. *Europace.* 2014. doi:10.1093/europace/euu006  
33  
34
- 35  
36 36. Colagiuri B, Zachariae R. Patient expectancy and post-chemotherapy nausea: A meta-  
37  
38 analysis. *Ann Behav Med.* 2010. doi:10.1007/s12160-010-9186-4  
39
- 40  
41 37. Nestoriuc Y, von Blanckenburg P, Schuricht F, et al. Is it best to expect the worst?  
42  
43 Influence of patients' side-effect expectations on endocrine treatment outcome in a 2-year  
44  
45 prospective clinical cohort study. *Ann Oncol.* 2016. doi:10.1093/annonc/mdw266  
46
- 47  
48 38. Mahomed NN, Liang MH, Cook EF, et al. The importance of patient expectations in  
49  
50 predicting functional outcomes after total joint arthroplasty. *J Rheumatol.* 2002.  
51
- 52  
53 39. Oettingen G, Mayer D. The motivating function of thinking about the future: Expectations  
54  
55 versus fantasies. *J Pers Soc Psychol.* 2002. doi:10.1037/0022-3514.83.5.1198  
56  
57  
58  
59

- 1  
2  
3 40. Booth-Kewley S, Schmied EA, Highfill-McRoy RM, Sander TC, Blivin SJ, Garland CF.  
4  
5 A prospective study of factors affecting recovery from musculoskeletal injuries. *J Occup*  
6  
7 *Rehabil.* 2014. doi:10.1007/s10926-013-9456-7  
8  
9  
10 41. Murgatroyd DF, Harris IA, Tran Y, Cameron ID. Predictors of return to work following  
11  
12 motor vehicle related orthopaedic trauma. *BMC Musculoskelet Disord.* 2016.  
13  
14 doi:10.1186/s12891-016-1019-6  
15  
16  
17 42. Oettingen G, Wadden TA. Expectation, fantasy, and weight loss: Is the impact of positive  
18  
19 thinking always positive? *Cognit Ther Res.* 1991. doi:10.1007/BF01173206  
20  
21  
22 43. Armitage CJ, Norman P, Alganem S, Conner M. Expectations Are More Predictive of  
23  
24 Behavior than Behavioral Intentions: Evidence from Two Prospective Studies. *Ann Behav*  
25  
26 *Med.* 2015. doi:10.1007/s12160-014-9653-4  
27  
28  
29 44. Crane MM, Ward DS, Lutes LD, Bowling JM, Tate DF. Theoretical and Behavioral  
30  
31 Mediators of a Weight Loss Intervention for Men. *Ann Behav Med.* 2016.  
32  
33 doi:10.1007/s12160-016-9774-z  
34  
35  
36 45. Lentjes MAH. The balance between food and dietary supplements in the general  
37  
38 population. *Proc Nutr Soc.* 2019. doi:10.1017/s0029665118002525  
39  
40  
41 46. Boerma T, Hosseinpoor AR, Verdes E, Chatterji S. A global assessment of the gender gap  
42  
43 in self-reported health with survey data from 59 countries. *BMC Public Health.* 2016.  
44  
45 doi:10.1186/s12889-016-3352-y  
46  
47  
48 47. Hosseinpoor AR, Stewart Williams J, Amin A, et al. Social determinants of self-reported  
49  
50 health in women and men: Understanding the role of gender in population health. *PLoS*  
51  
52 *One.* 2012. doi:10.1371/journal.pone.0034799  
53  
54  
55 48. Bethune R, Absher N, Obiagwu M, et al. Social determinants of self-reported health for  
56  
57  
58  
59

- 1  
2  
3 Canada's indigenous peoples: a public health approach. *Public Health*. 2018.  
4  
5  
6 49. Austin KG, McGraw SM, Lieberman HR. Multivitamin and protein supplement use is  
7  
8 associated with positive mood states and health behaviors in US military and coast guard  
9  
10 personnel. *J Clin Psychopharmacol*. 2014. doi:10.1097/JCP.0000000000000193  
11  
12 50. Bleicher K, Cumming RG, Naganathan V, et al. U-shaped association between serum 25-  
13  
14 hydroxyvitamin D and fracture risk in older men: Results from the prospective population-  
15  
16 based CHAMP study. *J Bone Miner Res*. 2014. doi:10.1002/jbmr.2230  
17  
18  
19 51. Hayes DP. Adverse effects of nutritional inadequacy and excess: A hormetic model. *Am J*  
20  
21 *Clin Nutr*. 2008. doi:10.1093/ajcn/88.2.578s  
22  
23  
24 52. Calabrese EJ, Baldwin LA. U-Shaped Dose-Responses in Biology, Toxicology, and  
25  
26 Public Health. *Annu Rev Public Health*. 2001. doi:10.1146/annurev.publhealth.22.1.15  
27  
28  
29 53. Aleksova A, Beltrami AP, Belfiore R, et al. U-shaped relationship between vitamin D  
30  
31 levels and long-term outcome in large cohort of survivors of acute myocardial infarction.  
32  
33 *Int J Cardiol*. 2016. doi:10.1016/j.ijcard.2016.08.322  
34  
35  
36 54. Kreiner CT, Nielsen TH, Serena BL. Role of income mobility for the measurement of  
37  
38 inequality in life expectancy. *Proc Natl Acad Sci*. 2018. doi:10.1073/pnas.1811455115  
39  
40  
41 55. Kamangar F, Emadi A. Vitamin and mineral supplements: Do we really need them? *Int J*  
42  
43 *Prev Med*. 2012.  
44  
45 56. PrescQIPP. *The Prescribing of Vitamins and Minerals Including Vitamin B Preparations*  
46  
47 *(DROP-List) Nutrition-Support-in-Adults B107. Vitamins and Minerals (DROP-List) 2.1.;*  
48  
49 2015. <http://pathways.nice.org.uk/pathways/>. Accessed July 13, 2020.  
50  
51  
52 57. Fletcher J, Cooper SC, Ghosh S, Hewison M. The role of vitamin D in inflammatory  
53  
54 bowel disease: Mechanism to management. *Nutrients*. 2019. doi:10.3390/nu11051019  
55  
56  
57  
58  
59  
60

- 1  
2  
3 58. Alleyne M, Horne MK, Miller JL. Individualized Treatment for Iron-deficiency Anemia in  
4 Adults. *Am J Med*. 2008. doi:10.1016/j.amjmed.2008.07.012  
5  
6  
7  
8 59. Blumberg JB, Frei BB, Fulgoni VL, Weaver CM, Zeisel SH. Impact of frequency of  
9 multi-vitamin/multi-mineral supplement intake on nutritional adequacy and nutrient  
10 deficiencies in U.S. adults. *Nutrients*. 2017;9(8). doi:10.3390/nu9080849  
11  
12  
13  
14 60. Blumberg JB, Cena H, Barr SI, et al. The Use of Multivitamin/Multimineral Supplements:  
15 A Modified Delphi Consensus Panel Report. *Clin Ther*. 2018;40(4):640-657.  
16  
17 doi:10.1016/j.clinthera.2018.02.014  
18  
19  
20  
21 61. Sobal jeffery, Muncie HL, Koch H. Prescription and recommendation of multivitamins  
22 by physicians in office based ambulatory care in the united states. *Nutr Res*. 1988.  
23  
24 doi:10.1016/S0271-5317(88)80114-3  
25  
26  
27  
28 62. Keyes KM, Rutherford C, Popham F, Martins SS, Gray L. How Healthy Are Survey  
29 Respondents Compared with the General Population?: Using Survey-linked Death  
30 Records to Compare Mortality Outcomes. *Epidemiology*. 2018.  
31  
32 doi:10.1097/EDE.0000000000000775  
33  
34  
35  
36  
37 63. Gorman E, Leyland AH, McCartney G, et al. Assessing the representativeness of  
38 population-sampled health surveys through linkage to administrative data on alcohol-  
39 related outcomes. *Am J Epidemiol*. 2014. doi:10.1093/aje/kwu207  
40  
41  
42  
43  
44

45  
46 **Table 1: Characteristics of American Adults by Multivitamin and Multimineral Supplement  
47 (MVM) Usage**

| 48<br>49<br>50<br>51<br>52<br>53<br>54<br>55<br>56<br>57<br>58<br>59<br>60 | Characteristic                | MVM non-users<br>(n = 4933 <sup>a</sup> ) | MVM users<br>(n = 16670 <sup>a</sup> ) | FDR-<br>adjusted<br>P value <sup>b</sup> |
|----------------------------------------------------------------------------|-------------------------------|-------------------------------------------|----------------------------------------|------------------------------------------|
|                                                                            | Weighted sample %             | 22.4 (21.8-23.0)                          | 77.6 (76.9-78.0)                       |                                          |
|                                                                            | Age, % (95% CI <sup>c</sup> ) |                                           |                                        |                                          |

|    |                                                    |                  |                  |        |
|----|----------------------------------------------------|------------------|------------------|--------|
| 1  |                                                    |                  |                  |        |
| 2  |                                                    |                  |                  |        |
| 3  | Mean age in years (95% CI)                         | 48.1 (47.4-48.7) | 49.7 (49.3-50.2) |        |
| 4  | 18-27 years                                        | 14.9 (13.8-16.2) | 13.1 (12.2-14.1) |        |
| 5  | 28-37 years                                        | 16.6 (15.4-18.0) | 16.9 (16.2-17.7) |        |
| 6  | 38-47 years                                        | 17.4 (16.3-18.6) | 15.3 (14.6-15.9) | <0.001 |
| 7  | 48-57 years                                        | 17.7 (16.4-19.0) | 17.6 (16.9-18.3) |        |
| 8  | 58-67 years                                        | 14.3 (13.2-15.5) | 15.4 (14.8-16.1) |        |
| 9  | 68-80 years                                        | 10.1 (9.2-11.1)  | 12.8 (12.1-13.5) |        |
| 10 | ≥ 80 years                                         | 5.9 (5.1-6.8)    | 6.2 (5.7-6.7)    |        |
| 11 | Race, % (95% CI <sup>c</sup> )                     |                  |                  |        |
| 12 | White only                                         | 82.2 (81.0-83.3) | 82.9 (82.1-83.6) |        |
| 13 | Black/African American only                        | 11.4 (10.4-12.5) | 10.4 (9.9-11.0)  |        |
| 14 | American Indian/ Alaskan Native                    | 1.1 (0.8-1.4)    | 0.6 (0.5-0.8)    | <0.001 |
| 15 | only                                               | 3.5 (3.1-4.0)    | 4.3 (3.9-4.6)    |        |
| 16 | Asian only                                         | 1.8 (1.5-2.2)    | 1.9 (1.6-2.1)    |        |
| 17 | Multiple race                                      | 54.1 (52.6-55.6) | 59.1 (58.2-60.1) | <0.001 |
| 18 | % Female (95% CI <sup>c</sup> )                    |                  |                  |        |
| 19 | Family Income, relative to federal                 |                  |                  |        |
| 20 | poverty level (95% CI <sup>c</sup> )               |                  |                  |        |
| 21 | <100%                                              | 16.9 (15.3-18.4) | 12.4 (11.5-13.3) |        |
| 22 | 100%-199%                                          | 19.7 (18.2-21.2) | 17.9 (17.1-18.8) |        |
| 23 | 200%- 299%                                         | 17.3 (15.8-18.7) | 17.0 (16.2-17.8) | <0.001 |
| 24 | 300%-399%                                          | 12.8 (11.4-14.2) | 13.4 (12.6-14.1) |        |
| 25 | 400% +                                             | 33.4 (31.1-35.6) | 39.4 (37.9-40.9) |        |
| 26 | Education status, % (95% CI <sup>c</sup> )         |                  |                  |        |
| 27 | Did not graduate high school                       | 11.7 (10.7-12.8) | 9.6 (9.0-10.1)   |        |
| 28 | Grade 12 or GED                                    | 26.6 (24.8-28.5) | 22.4 (21.4-23.4) |        |
| 29 | Some college, no degree                            | 22.1 (20.5-23.8) | 21.2 (20.1-22.4) | <0.001 |
| 30 | Associates degree                                  | 10.8 (9.7-11.9)  | 12.0 (11.4-12.6) |        |
| 31 | College graduate or higher                         | 28.7 (26.7-30.7) | 34.7 (33.3-36.2) |        |
| 32 | Relationship status, % (95% CI <sup>c</sup> )      |                  |                  |        |
| 33 | Married or living with partner                     | 49.0 (46.4-51.7) | 51.0 (49.4-52.7) |        |
| 34 | Separated, divorced, or widowed                    | 26.6 (25.0-28.3) | 26.7 (25.6-27.8) | <0.001 |
| 35 | Never married                                      | 24.3 (22.5-26.1) | 22.3 (21.0-23.5) |        |
| 36 | Employment status, % (95% CI <sup>c</sup> )        |                  |                  |        |
| 37 | Employed                                           | 58.1 (55.2-60.9) | 58.6 (56.7-60.5) |        |
| 38 | Unemployed, looking for work                       | 6.1 (5.2-7.0)    | 5.2 (4.8-5.6)    | 0.05   |
| 39 | Not in labor force                                 | 35.8 (33.7-37.9) | 36.2 (34.8-37.6) |        |
| 40 | Minor child in household, % (95% CI <sup>c</sup> ) | 30.4 (28.8-32.0) | 26.5 (25.5-27.3) | <0.001 |

|    |                                                                                          |                  |                  |        |
|----|------------------------------------------------------------------------------------------|------------------|------------------|--------|
| 1  |                                                                                          |                  |                  |        |
| 2  |                                                                                          |                  |                  |        |
| 3  | Non-English-speaking interview, %                                                        |                  |                  | 0.66   |
| 4  | (95% CI <sup>c</sup> )                                                                   | 3.6 (3.1-4.1)    | 3.5 (3.1-3.8)    |        |
| 5  | Has health insurance, % (95% CI <sup>c</sup> )                                           | 84.3 (83.1-85.4) | 87.4 (86.9-88.0) | <0.001 |
| 6  | No office visit for health care in the past                                              |                  |                  | <0.001 |
| 7  | two weeks, % (95% CI <sup>c</sup> )                                                      | 79.8 (78.6-81.0) | 76.4 (75.7-77.1) |        |
| 8  | Unmet medical care due to cost in the                                                    |                  |                  | 0.19   |
| 9  | past year, % (95% CI <sup>c</sup> )                                                      | 9.4 (8.5-10.3)   | 8.7 (8.3-9.2)    |        |
| 10 |                                                                                          |                  |                  |        |
| 11 |                                                                                          |                  |                  |        |
| 12 |                                                                                          |                  |                  |        |
| 13 |                                                                                          |                  |                  |        |
| 14 |                                                                                          |                  |                  |        |
| 15 |                                                                                          |                  |                  |        |
| 16 | a. Unweighted sample size                                                                |                  |                  |        |
| 17 |                                                                                          |                  |                  |        |
| 18 | b. FDR-adjusted P value was computed using the Benjamini-Hochberg procedure. P values    |                  |                  |        |
| 19 | were computed using a two-sample t-test or chi-square test for independence.             |                  |                  |        |
| 20 |                                                                                          |                  |                  |        |
| 21 |                                                                                          |                  |                  |        |
| 22 |                                                                                          |                  |                  |        |
| 23 | c. All confidence intervals were computed based on a Rao-Scott-scaled chi-squared        |                  |                  |        |
| 24 | distribution for the loglikelihood from a binomial distribution using the Survey package |                  |                  |        |
| 25 | in R.                                                                                    |                  |                  |        |
| 26 |                                                                                          |                  |                  |        |
| 27 |                                                                                          |                  |                  |        |
| 28 |                                                                                          |                  |                  |        |
| 29 |                                                                                          |                  |                  |        |
| 30 |                                                                                          |                  |                  |        |
| 31 |                                                                                          |                  |                  |        |
| 32 |                                                                                          |                  |                  |        |
| 33 |                                                                                          |                  |                  |        |
| 34 |                                                                                          |                  |                  |        |
| 35 |                                                                                          |                  |                  |        |
| 36 |                                                                                          |                  |                  |        |
| 37 |                                                                                          |                  |                  |        |
| 38 |                                                                                          |                  |                  |        |
| 39 |                                                                                          |                  |                  |        |
| 40 |                                                                                          |                  |                  |        |
| 41 |                                                                                          |                  |                  |        |
| 42 |                                                                                          |                  |                  |        |
| 43 |                                                                                          |                  |                  |        |
| 44 |                                                                                          |                  |                  |        |
| 45 |                                                                                          |                  |                  |        |
| 46 |                                                                                          |                  |                  |        |
| 47 |                                                                                          |                  |                  |        |
| 48 |                                                                                          |                  |                  |        |
| 49 |                                                                                          |                  |                  |        |
| 50 |                                                                                          |                  |                  |        |
| 51 |                                                                                          |                  |                  |        |
| 52 |                                                                                          |                  |                  |        |
| 53 |                                                                                          |                  |                  |        |
| 54 |                                                                                          |                  |                  |        |
| 55 |                                                                                          |                  |                  |        |
| 56 |                                                                                          |                  |                  |        |
| 57 |                                                                                          |                  |                  |        |
| 58 |                                                                                          |                  |                  |        |
| 59 |                                                                                          |                  |                  |        |
| 60 |                                                                                          |                  |                  |        |

**Table 2. Association between MVM Usage and Health Status**

| Characteristic                                                                      | MVM non-users    | MVM users        | Adjusted Effect of MVM usage, $\beta$ or OR (95% CI) <sup>a</sup> | FDR-adjusted <i>P</i> value <sup>e</sup> |
|-------------------------------------------------------------------------------------|------------------|------------------|-------------------------------------------------------------------|------------------------------------------|
| Self-rated overall health as excellent, very good or good, % (95% CI <sup>f</sup> ) | 84.9 (83.8-86.0) | 88.3 (87.7-88.9) | OR=1.3 (1.2-1.5)                                                  | <0.001                                   |
| Needs help with ADLs, % (95% CI <sup>f</sup> )                                      | 5.6 (4.8-6.3)    | 4.8 (4.4-5.2)    | OR = 0.86 (0.7-1.04)                                              | 0.07                                     |
| History of chronic conditions, % (95% CI <sup>f</sup> )                             |                  |                  |                                                                   |                                          |
| Mean number of chronic conditions                                                   | 1.07 (1.03-1.11) | 1.09 (1.06-1.11) | $\beta = 0.03$ (-0.07-0.007)                                      | 0.07                                     |
| No chronic conditions                                                               | 44.4 (42.0-46.8) | 43.0 (41.4-44.5) |                                                                   |                                          |
| 1 chronic condition                                                                 | 26.3 (24.5-28.2) | 26.4 (25.4-27.5) |                                                                   |                                          |
| Multiple chronic conditions                                                         | 28.4 (26.7-30.0) | 29.7 (28.6-30.7) |                                                                   |                                          |
| Health conditions in past year <sup>d</sup> (95% CI <sup>f</sup> )                  |                  |                  |                                                                   |                                          |
| Mean number of present conditions                                                   | 2.8 (2.7-2.9)    | 2.7 (2.7-2.8)    | $\beta=-0.06$ (-0.2-0.02)                                         | 0.08                                     |
| 0-5 present conditions                                                              | 84.7 (81.3-88.1) | 85.2 (83.0-87.6) |                                                                   |                                          |
| 6-10 present conditions                                                             | 12.7 (11.6-13.8) | 12.4 (11.7-13.0) |                                                                   |                                          |
| $\geq 10$ present conditions                                                        | 1.5 (1.1-1.9)    | 1.4 (1.2-1.6)    |                                                                   |                                          |
| Kessler 6-item score, % (95% CI <sup>f</sup> )                                      |                  |                  |                                                                   |                                          |
| Mean Kessler score                                                                  | 2.5 (2.4 -2.6)   | 2.3 (2.3-2.4)    | $\beta=-0.08$ (-0.2-0.04)                                         | 0.13                                     |
| No impairment                                                                       | 80.9 (77.4-84.4) | 82.3 (80.0-84.6) |                                                                   |                                          |
| Moderate Impairment                                                                 | 15.4 (14.2-16.6) | 14.8 (14.1-15.5) |                                                                   |                                          |
| Severe Impairment                                                                   | 3.7 (3.1-4.2)    | 2.9 (2.6-3.2)    |                                                                   |                                          |

a) Estimates were produced after adjusting for age, sex, race, region, education level, income, employment status, health insurance status, presence of child in household,

1  
2  
3 marital status, unmet medical care due to cost in the past year, and not seeing a health  
4  
5 professional in office in the past two weeks  
6  
7

- 8 b) *P* value was defined using a multivariate regression model controlling for age, sex, race,  
9  
10 region, education level, income, employment status, health insurance status, presence of  
11  
12 child in household, marital status, unmet medical care due to cost in the past year, and not  
13  
14 seeing a health professional in office in the past two weeks  
15  
16
- 17 c) Ten chronic diseases included: cancer, hypertension, coronary heart disease, stroke,  
18  
19 chronic obstructive pulmonary disease, asthma, diabetes, arthritis, hepatitis, and  
20  
21 weak/failing kidneys  
22  
23
- 24 d) 19 health conditions in the past 12 months included: respiratory, digestive, skin, and other  
25  
26 allergy, acid reflux, hay fever, chest cold, nausea and vomiting, sore throat, infectious  
27  
28 disease, recurring headache, memory loss, neurological problems, sprains, and  
29  
30 abdominal, dental, muscle/bone, chronic, and skin pain  
31  
32
- 33 e) FDR-adjusted *P* values were computed using the Benjamini-Hochberg procedure  
34  
35
- 36 f) All confidence intervals were computed based on a Rao-Scott-scaled chi-squared  
37  
38 distribution for the loglikelihood from a binomial distribution using the Survey package  
39  
40 in R.  
41  
42  
43  
44  
45  
46  
47  
48  
49  
50  
51  
52  
53  
54  
55  
56  
57  
58  
59  
60



**Table 3: Association Between MVM Usage and Self-Reported Overall Health in Sociodemographic Subgroups**

| Group                                                            | Self-rated overall health as excellent, very good or good, % (95% CI <sup>a</sup> ), MVM Non-Users | Self-rated overall health as excellent, very good or good, % (95% CI <sup>a</sup> ), MVM Users | Adjusted Effect of MVM usage on self-reported health, OR (95% CI <sup>a</sup> ) <sup>b</sup> | FDR Adjusted <i>P</i> value <sup>c</sup> |
|------------------------------------------------------------------|----------------------------------------------------------------------------------------------------|------------------------------------------------------------------------------------------------|----------------------------------------------------------------------------------------------|------------------------------------------|
| <b>Age</b>                                                       |                                                                                                    |                                                                                                |                                                                                              |                                          |
| 18-44 years                                                      | 92.3 (91.1-93.5)                                                                                   | 94.2 (93.6-94.8)                                                                               | 1.3 (1.0-1.6)                                                                                | 0.03                                     |
| 45-64 years                                                      | 79.9 (77.8-82.1)                                                                                   | 85.3 (84.2-86.4)                                                                               | 1.3 (1.1-1.6)                                                                                | 0.009                                    |
| 65+ years                                                        | 77.2 (73.8-80.5)                                                                                   | 82.0 (80.6-83.4)                                                                               | 1.2 (1.0-1.5)                                                                                | 0.06                                     |
| <b>Race</b>                                                      |                                                                                                    |                                                                                                |                                                                                              |                                          |
| White                                                            | 85.9 (84.7-87.2)                                                                                   | 89.1 (88.5-89.7)                                                                               | 1.3 (1.1-1.7)                                                                                | 0.009                                    |
| Non-white                                                        | 80.0 (77.2-82.7)                                                                                   | 84.2 (82.8-85.6)                                                                               | 1.3 (1.1-1.5)                                                                                | 0.007                                    |
| <b>Sex</b>                                                       |                                                                                                    |                                                                                                |                                                                                              |                                          |
| Female                                                           | 84.0 (82.5-85.4)                                                                                   | 88.1 (87.4-88.9)                                                                               | 1.2 (1.1-1.4)                                                                                | 0.009                                    |
| Male                                                             | 85.9 (84.2-87.7)                                                                                   | 88.4 (87.5-89.3)                                                                               | 1.3 (1.1-1.6)                                                                                | 0.009                                    |
| <b>Family Income, relative to federal poverty level (95% CI)</b> |                                                                                                    |                                                                                                |                                                                                              |                                          |
| <100%                                                            | 71.7 (68.0-75.4)                                                                                   | 75.6 (73.1-78.1)                                                                               | 1.4 (1.1-1.8)                                                                                | 0.007                                    |
| 100%-199%                                                        | 76.4 (73.6-79.2)                                                                                   | 80.7 (79.0-82.4)                                                                               | 1.4 (1.1-1.7)                                                                                | 0.007                                    |
| 200%- 299%                                                       | 84.8 (82.1-87.5)                                                                                   | 87.3 (85.9-88.6)                                                                               | 1.3 (1.0-1.7)                                                                                | 0.04                                     |
| 300%-399%                                                        | 89.6 (86.4-92.7)                                                                                   | 91.0 (89.6-92.4)                                                                               | 1.3 (0.9-2.0)                                                                                | 0.15                                     |
| 400% +                                                           | 94.8 (93.5-96.1)                                                                                   | 95.2 (94.6-95.8)                                                                               | 1.1 (0.8-1.6)                                                                                | 0.23                                     |
| <b>Education</b>                                                 |                                                                                                    |                                                                                                |                                                                                              |                                          |
| Did not graduate high school                                     | 67.2 (63.1-71.3)                                                                                   | 71.9 (69.7-74.2)                                                                               | 1.4 (1.1-1.9)                                                                                | 0.01                                     |

|    |                      |                  |                  |               |      |
|----|----------------------|------------------|------------------|---------------|------|
| 1  |                      |                  |                  |               |      |
| 2  |                      |                  |                  |               |      |
| 3  |                      | 84.1 (82.6-85.5) | 86.7 (85.9-87.4) | 1.2 (1.0-1.4) | 0.01 |
| 4  | High school graduate |                  |                  |               |      |
| 5  | College graduate or  | 93.8 (92.4-95.1) | 95.3 (94.7-95.9) | 1.4 (1.0-1.9) | 0.03 |
| 6  | higher               |                  |                  |               |      |
| 7  |                      |                  |                  |               |      |
| 8  |                      |                  |                  |               |      |
| 9  |                      |                  |                  |               |      |
| 10 |                      |                  |                  |               |      |
| 11 |                      |                  |                  |               |      |
| 12 |                      |                  |                  |               |      |
| 13 |                      |                  |                  |               |      |
| 14 |                      |                  |                  |               |      |
| 15 |                      |                  |                  |               |      |
| 16 |                      |                  |                  |               |      |
| 17 |                      |                  |                  |               |      |
| 18 |                      |                  |                  |               |      |
| 19 |                      |                  |                  |               |      |
| 20 |                      |                  |                  |               |      |
| 21 |                      |                  |                  |               |      |
| 22 |                      |                  |                  |               |      |
| 23 |                      |                  |                  |               |      |
| 24 |                      |                  |                  |               |      |
| 25 |                      |                  |                  |               |      |
| 26 |                      |                  |                  |               |      |
| 27 |                      |                  |                  |               |      |
| 28 |                      |                  |                  |               |      |
| 29 |                      |                  |                  |               |      |
| 30 |                      |                  |                  |               |      |
| 31 |                      |                  |                  |               |      |
| 32 |                      |                  |                  |               |      |
| 33 |                      |                  |                  |               |      |
| 34 |                      |                  |                  |               |      |
| 35 |                      |                  |                  |               |      |
| 36 |                      |                  |                  |               |      |
| 37 |                      |                  |                  |               |      |
| 38 |                      |                  |                  |               |      |
| 39 |                      |                  |                  |               |      |
| 40 |                      |                  |                  |               |      |
| 41 |                      |                  |                  |               |      |
| 42 |                      |                  |                  |               |      |
| 43 |                      |                  |                  |               |      |
| 44 |                      |                  |                  |               |      |
| 45 |                      |                  |                  |               |      |
| 46 |                      |                  |                  |               |      |
| 47 |                      |                  |                  |               |      |
| 48 |                      |                  |                  |               |      |
| 49 |                      |                  |                  |               |      |
| 50 |                      |                  |                  |               |      |
| 51 |                      |                  |                  |               |      |
| 52 |                      |                  |                  |               |      |
| 53 |                      |                  |                  |               |      |
| 54 |                      |                  |                  |               |      |
| 55 |                      |                  |                  |               |      |
| 56 |                      |                  |                  |               |      |
| 57 |                      |                  |                  |               |      |
| 58 |                      |                  |                  |               |      |
| 59 |                      |                  |                  |               |      |
| 60 |                      |                  |                  |               |      |

- a) All confidence intervals were computed based on a Rao-Scott-scaled chi-squared distribution for the loglikelihood from a binomial distribution using the Survey package in R.
- b) Estimates were produced after adjusting for age, sex, race, region, education level, income, employment status, health insurance status, presence of child in household, marital status, unmet medical care due to cost in the past year, and not seeing a health professional in office in the past two weeks.
- c) FDR-adjusted P values were computed using the Benjamini-Hochberg procedure. *P* value was defined using a multivariate regression model controlling for age, sex, race, region, education level, income, employment status, health insurance status, presence of child in household, marital status, unmet medical care due to cost in the past year, and not seeing a health professional in office in the past two weeks.

1  
2  
3 **Supplement for:**  
4

5 **Self-reported health without clinically measurable benefits among adult users of**  
6 **multivitamin and multimineral supplements: a cross-sectional study**  
7  
8

9  
10 Paranjpe, Chin et. al.  
11  
12  
13

14  
15 **Tables:**

16 Table S1: Interaction between demographic variable and MVM use on self-reported health  
17  
18  
19  
20  
21  
22  
23  
24  
25  
26  
27  
28  
29  
30  
31  
32  
33  
34  
35  
36  
37  
38  
39  
40  
41  
42  
43  
44  
45  
46  
47  
48  
49  
50  
51  
52  
53  
54  
55  
56  
57  
58  
59  
60

**Table S1: Interaction between demographic variable and MVM use on self-reported health**

| Demographic Variable                                                                          | MVM use:demographic variable interaction on self-reported overall health, $\beta_{\text{Interaction}}$ (95% CI) <sup>a</sup> | FDR Adjusted <i>P</i> value <sup>b</sup> |
|-----------------------------------------------------------------------------------------------|------------------------------------------------------------------------------------------------------------------------------|------------------------------------------|
| Age (18-44 years, 45-64 years, 65+ years)                                                     | 1.1 (0.9-1.2)                                                                                                                | 0.50                                     |
| Race (White or non-white)                                                                     | 1.0 (0.9-1.1)                                                                                                                | 0.50                                     |
| Sex                                                                                           | 1.0 (0.8-1.3)                                                                                                                | 0.50                                     |
| Family Income, relative to federal poverty level (<100%, 100-199%, 200-299%, 300-399%, 400%+) | 1.0 (0.9-1.1)                                                                                                                | 0.50                                     |
| Education (Did not graduate high school, high school graduate, , college graduate)            | 1.0 (1.0-1.1)                                                                                                                | 0.50                                     |

- a) Estimates were produced after adjusting for age, sex, race, region, education level, income, employment status, health insurance status, presence of child in household, marital status, unmet medical care due to cost in the past year, and not seeing a health professional in office in the past two weeks.
- b) FDR-adjusted *P* values were computed using the Benjamini-Hochberg procedure. *P* value was defined using a multivariate regression model controlling for age, sex, race, region, education level, income, employment status, health insurance status, presence of child in household, marital status, unmet medical care due to cost in the past year, and not seeing a health professional in office in the past two weeks.

STROBE Statement—Checklist of items that should be included in reports of *cross-sectional studies*

|                              | Item No | Recommendation                                                                                                                                                                                               | Page No |
|------------------------------|---------|--------------------------------------------------------------------------------------------------------------------------------------------------------------------------------------------------------------|---------|
| <b>Title and abstract</b>    | 1       | (a) Indicate the study's design with a commonly used term in the title or the abstract                                                                                                                       | 1       |
|                              |         | (b) Provide in the abstract an informative and balanced summary of what was done and what was found                                                                                                          | 2       |
| <b>Introduction</b>          |         |                                                                                                                                                                                                              |         |
| Background/rationale         | 2       | Explain the scientific background and rationale for the investigation being reported                                                                                                                         | 4-5     |
| Objectives                   | 3       | State specific objectives, including any prespecified hypotheses                                                                                                                                             | 2       |
| <b>Methods</b>               |         |                                                                                                                                                                                                              |         |
| Study design                 | 4       | Present key elements of study design early in the paper                                                                                                                                                      | 6-7     |
| Setting                      | 5       | Describe the setting, locations, and relevant dates, including periods of recruitment, exposure, follow-up, and data collection                                                                              | 6-7     |
| Participants                 | 6       | (a) Give the eligibility criteria, and the sources and methods of selection of participants                                                                                                                  | 6       |
| Variables                    | 7       | Clearly define all outcomes, exposures, predictors, potential confounders, and effect modifiers. Give diagnostic criteria, if applicable                                                                     | 6-7     |
| Data sources/<br>measurement | 8*      | For each variable of interest, give sources of data and details of methods of assessment (measurement). Describe comparability of assessment methods if there is more than one group                         | 6-7     |
| Bias                         | 9       | Describe any efforts to address potential sources of bias                                                                                                                                                    | 6-7     |
| Study size                   | 10      | Explain how the study size was arrived at                                                                                                                                                                    | 6-7     |
| Quantitative variables       | 11      | Explain how quantitative variables were handled in the analyses. If applicable, describe which groupings were chosen and why                                                                                 | 7       |
| Statistical methods          | 12      | (a) Describe all statistical methods, including those used to control for confounding                                                                                                                        | 7       |
|                              |         | (b) Describe any methods used to examine subgroups and interactions                                                                                                                                          | 7       |
|                              |         | (c) Explain how missing data were addressed                                                                                                                                                                  | 7       |
|                              |         | (d) If applicable, describe analytical methods taking account of sampling strategy                                                                                                                           | 7       |
|                              |         | (e) Describe any sensitivity analyses                                                                                                                                                                        | 7       |
| <b>Results</b>               |         |                                                                                                                                                                                                              |         |
| Participants                 | 13*     | (a) Report numbers of individuals at each stage of study—eg numbers potentially eligible, examined for eligibility, confirmed eligible, included in the study, completing follow-up, and analysed            | 8       |
|                              |         | (b) Give reasons for non-participation at each stage                                                                                                                                                         | 8       |
|                              |         | (c) Consider use of a flow diagram                                                                                                                                                                           |         |
| Descriptive data             | 14*     | (a) Give characteristics of study participants (eg demographic, clinical, social) and information on exposures and potential confounders                                                                     | 8       |
|                              |         | (b) Indicate number of participants with missing data for each variable of interest                                                                                                                          | 8       |
| Outcome data                 | 15*     | Report numbers of outcome events or summary measures                                                                                                                                                         | 8-10    |
| Main results                 | 16      | (a) Give unadjusted estimates and, if applicable, confounder-adjusted estimates and their precision (eg, 95% confidence interval). Make clear which confounders were adjusted for and why they were included | 8-10    |

1  
2  
3  
4  
5  
6  
7  
8  
9  
10  
11  
12  
13  
14  
15  
16  
17  
18  
19  
20  
21  
22  
23  
24  
25  
26  
27  
28  
29  
30  
31  
32  
33  
34  
35  
36  
37  
38  
39  
40  
41  
42  
43  
44  
45  
46  
47  
48  
49  
50  
51  
52  
53  
54  
55  
56  
57  
58  
59  
60

|                          |    |                                                                                                                                                                            |       |
|--------------------------|----|----------------------------------------------------------------------------------------------------------------------------------------------------------------------------|-------|
|                          |    | (b) Report category boundaries when continuous variables were categorized                                                                                                  | 8-10  |
|                          |    | (c) If relevant, consider translating estimates of relative risk into absolute risk for a meaningful time period                                                           |       |
| Other analyses           | 17 | Report other analyses done—eg analyses of subgroups and interactions, and sensitivity analyses                                                                             | 9-10  |
| <b>Discussion</b>        |    |                                                                                                                                                                            |       |
| Key results              | 18 | Summarise key results with reference to study objectives                                                                                                                   | 10-11 |
| Limitations              | 19 | Discuss limitations of the study, taking into account sources of potential bias or imprecision. Discuss both direction and magnitude of any potential bias                 | 12-13 |
| Interpretation           | 20 | Give a cautious overall interpretation of results considering objectives, limitations, multiplicity of analyses, results from similar studies, and other relevant evidence | 11-13 |
| Generalisability         | 21 | Discuss the generalisability (external validity) of the study results                                                                                                      | 12    |
| <b>Other information</b> |    |                                                                                                                                                                            |       |
| Funding                  | 22 | Give the source of funding and the role of the funders for the present study and, if applicable, for the original study on which the present article is based              | 14    |

\*Give information separately for exposed and unexposed groups.

**Note:** An Explanation and Elaboration article discusses each checklist item and gives methodological background and published examples of transparent reporting. The STROBE checklist is best used in conjunction with this article (freely available on the Web sites of PLoS Medicine at <http://www.plosmedicine.org/>, Annals of Internal Medicine at <http://www.annals.org/>, and Epidemiology at <http://www.epidem.com/>). Information on the STROBE Initiative is available at [www.strobe-statement.org](http://www.strobe-statement.org).

# BMJ Open

## Self-reported health without clinically measurable benefits among adult users of multivitamin and multiminerall supplements: a cross-sectional study

|                                 |                                                                                                                                                                                                                                                                                                                                                                                                                                                                                                                                                                                                                                                                                                                                                                                                                                                                                                                                                                                                                                                                                                                                                                                                                                                                                                                                                                                                                                                                                                                                                                                                                                                                                                   |
|---------------------------------|---------------------------------------------------------------------------------------------------------------------------------------------------------------------------------------------------------------------------------------------------------------------------------------------------------------------------------------------------------------------------------------------------------------------------------------------------------------------------------------------------------------------------------------------------------------------------------------------------------------------------------------------------------------------------------------------------------------------------------------------------------------------------------------------------------------------------------------------------------------------------------------------------------------------------------------------------------------------------------------------------------------------------------------------------------------------------------------------------------------------------------------------------------------------------------------------------------------------------------------------------------------------------------------------------------------------------------------------------------------------------------------------------------------------------------------------------------------------------------------------------------------------------------------------------------------------------------------------------------------------------------------------------------------------------------------------------|
| Journal:                        | <i>BMJ Open</i>                                                                                                                                                                                                                                                                                                                                                                                                                                                                                                                                                                                                                                                                                                                                                                                                                                                                                                                                                                                                                                                                                                                                                                                                                                                                                                                                                                                                                                                                                                                                                                                                                                                                                   |
| Manuscript ID                   | bmjopen-2020-039119.R2                                                                                                                                                                                                                                                                                                                                                                                                                                                                                                                                                                                                                                                                                                                                                                                                                                                                                                                                                                                                                                                                                                                                                                                                                                                                                                                                                                                                                                                                                                                                                                                                                                                                            |
| Article Type:                   | Original research                                                                                                                                                                                                                                                                                                                                                                                                                                                                                                                                                                                                                                                                                                                                                                                                                                                                                                                                                                                                                                                                                                                                                                                                                                                                                                                                                                                                                                                                                                                                                                                                                                                                                 |
| Date Submitted by the Author:   | 29-Aug-2020                                                                                                                                                                                                                                                                                                                                                                                                                                                                                                                                                                                                                                                                                                                                                                                                                                                                                                                                                                                                                                                                                                                                                                                                                                                                                                                                                                                                                                                                                                                                                                                                                                                                                       |
| Complete List of Authors:       | <p>Paranjpe, Manish; Harvard Medical School, Health Sciences and Technology Program<br/> Chin, Alfred; Weill Cornell Medical College, Weill Cornell/Rockefeller/Sloan Kettering Tri-Institutional MD-PhD Program<br/> Paranjpe, Ishan; Mount Sinai School of Medicine, Charles Bronfman Institute for Personalized Medicine<br/> Reid, Nicholas; Harvard Medical School<br/> Duy, Phan; Yale University School of Medicine, Medical Scientist Training Program<br/> Wang, Jason; Harvard Medical School, Health Sciences and Technology Program<br/> O'Hagan, Ross; Mount Sinai School of Medicine, Charles Bronfman Institute for Personalized Medicine<br/> Arzani, Artine ; Weill Cornell Medical College<br/> Haghdel, Arsalan ; Weill Cornell Medical College<br/> Lim, Clarence; Texas A&amp;M University System Health Science Center College of Medicine<br/> Orhurhu, Vwaire ; Harvard Medical School, Department of Anesthesia, Critical Care and Pain MedicineBeth Israel Deaconess Medical Center; Harvard Medical School<br/> Urits, Ivan; Massachusetts General Hospital, Department of Anesthesia, Critical Care and Pain Medicine; Harvard Medical School<br/> Ngo, Anh; Beth Israel Deaconess Medical Center, Department of Anesthesia, Critical Care, and Pain Medicine; Harvard Medical School<br/> Glicksberg, Benjamin; Mount Sinai School of Medicine, Charles Bronfman Institute for Personalized Medicine<br/> Hall, Kathryn; Brigham and Women's Hospital, Division of Preventive Medicine<br/> Mehta, Darshan ; Massachusetts General Hospital,<br/> Cooper, Richard; Loyola University Medical Center<br/> Nadkarni, GN ; Icahn School of Medicine at Mount Sinai,</p> |
| <b>Primary Subject Heading</b>: | Nutrition and metabolism                                                                                                                                                                                                                                                                                                                                                                                                                                                                                                                                                                                                                                                                                                                                                                                                                                                                                                                                                                                                                                                                                                                                                                                                                                                                                                                                                                                                                                                                                                                                                                                                                                                                          |
| Secondary Subject Heading:      | General practice / Family practice, Complementary medicine                                                                                                                                                                                                                                                                                                                                                                                                                                                                                                                                                                                                                                                                                                                                                                                                                                                                                                                                                                                                                                                                                                                                                                                                                                                                                                                                                                                                                                                                                                                                                                                                                                        |
| Keywords:                       | NUTRITION & DIETETICS, GENERAL MEDICINE (see Internal Medicine), COMPLEMENTARY MEDICINE                                                                                                                                                                                                                                                                                                                                                                                                                                                                                                                                                                                                                                                                                                                                                                                                                                                                                                                                                                                                                                                                                                                                                                                                                                                                                                                                                                                                                                                                                                                                                                                                           |

1  
2  
3  
4  
5  
6  
7  
8  
9  
10  
11  
12  
13  
14  
15  
16  
17  
18  
19  
20  
21  
22  
23  
24  
25  
26  
27  
28  
29  
30  
31  
32  
33  
34  
35  
36  
37  
38  
39  
40  
41  
42  
43  
44  
45  
46  
47  
48  
49  
50  
51  
52  
53  
54  
55  
56  
57  
58  
59  
60



SCHOLARONE™  
Manuscripts





I, the Submitting Author has the right to grant and does grant on behalf of all authors of the Work (as defined in the below author licence), an exclusive licence and/or a non-exclusive licence for contributions from authors who are: i) UK Crown employees; ii) where BMJ has agreed a CC-BY licence shall apply, and/or iii) in accordance with the terms applicable for US Federal Government officers or employees acting as part of their official duties; on a worldwide, perpetual, irrevocable, royalty-free basis to BMJ Publishing Group Ltd ("BMJ") its licensees and where the relevant Journal is co-owned by BMJ to the co-owners of the Journal, to publish the Work in this journal and any other BMJ products and to exploit all rights, as set out in our [licence](#).

The Submitting Author accepts and understands that any supply made under these terms is made by BMJ to the Submitting Author unless you are acting as an employee on behalf of your employer or a postgraduate student of an affiliated institution which is paying any applicable article publishing charge ("APC") for Open Access articles. Where the Submitting Author wishes to make the Work available on an Open Access basis (and intends to pay the relevant APC), the terms of reuse of such Open Access shall be governed by a Creative Commons licence – details of these licences and which [Creative Commons](#) licence will apply to this Work are set out in our licence referred to above.

Other than as permitted in any relevant BMJ Author's Self Archiving Policies, I confirm this Work has not been accepted for publication elsewhere, is not being considered for publication elsewhere and does not duplicate material already published. I confirm all authors consent to publication of this Work and authorise the granting of this licence.

## Self-reported health without clinically measurable benefits among adult users of multivitamin and multimineral supplements: a cross-sectional study

Manish D. Paranjpe<sup>1+\*</sup>; Alfred C. Chin<sup>2+</sup>; Ishan Paranjpe<sup>3</sup>; Nicholas J. Reid<sup>4</sup>; Phan Q. Duy<sup>5</sup>; Jason K. Wang<sup>1</sup>; Ross O'Hagan<sup>3</sup>; Artine Arzani<sup>6</sup>; Arsalan Haghdel<sup>6</sup>; Clarence C. Lim<sup>7</sup>; Vwaire Orhurhu<sup>4,8</sup>; Ivan Urits<sup>4,8</sup>; Anh L. Ngo<sup>4,9</sup>; Benjamin S. Glicksberg<sup>3</sup>; Kathryn T. Hall<sup>10,11</sup>; Darshan H. Mehta<sup>12,13</sup>; Richard S. Cooper<sup>14</sup>; Girish N. Nadkarni<sup>3\*</sup>

1. Harvard-MIT Program in Health Sciences and Technology, Harvard Medical School, Boston, MA
2. Weill Cornell/Rockefeller/Sloan Kettering Tri-Institutional MD-PhD Program, New York, NY
3. Charles Bronfman Institute for Personalized Medicine, Icahn School of Medicine at Mount Sinai, New York, NY
4. Harvard Medical School, Boston, MA
5. Medical Scientist Training Program, Yale University School of Medicine, New Haven, CT
6. Weill Cornell Medical College, New York, NY
7. Texas A&M Health Science Center College of Medicine, College Station, TX
8. Department of Anesthesia, Critical Care and Pain Medicine, Massachusetts General Hospital, Boston, MA
9. Department of Anesthesia, Critical Care, and Pain Medicine, Beth Israel Deaconess Medical Center, Boston, MA
10. Division of Preventive Medicine, Brigham and Women's Hospital, Boston, MA
11. Program in Placebo Studies, Beth Israel Deaconess Medical Center, Boston, MA
12. Osher Center for Integrative Medicine, Brigham & Women's Hospital, and Harvard Medical School, Boston, MA
13. Benson-Henry Institute for Mind Body Medicine, Massachusetts General Hospital, Boston, MA
14. Loyola University Medical Center, Chicago, IL

+ These authors contributed equally to the study

\* To whom correspondence should be addressed

**Corresponding author:** Manish D. Paranjpe, Harvard-MIT Health Sciences and Technology Program, Harvard Medical School, 25 Shattuck Street, Boston MA, 02115  
(manish\_paranjpe@hms.harvard.edu)

**Word Count:** 3,163

## ABSTRACT

**Objectives:** Multiple clinical trials fail to identify clinically measurable health benefits of daily multivitamin and multi-mineral (MVM) consumption in the general adult population.

Understanding the determinants of widespread use of MVMs may guide efforts to better educate the public about effective nutritional practices. The objective of this study was to compare self-reported and clinically measurable health outcomes among MVM users and non-users in a large, nationally representative sample of adult civilian non-institutionalized population of the US surveyed on the use of complementary health practices.

**Design:** Cross-sectional analysis of the effect of MVM consumption on self-reported overall health and clinically measurable health outcomes.

**Participants:** Adult MVM users and non-users from the 2012 National Health Interview Survey (n=21,603).

**Primary and secondary outcome measures:** Five psychological, physical, and functional health outcomes 1) self-rated health status, 2) needing help with routine needs, 3) history of 10 chronic diseases, 4) presence of 19 health conditions in the past 12 months, and 5) Kessler 6-Item (K6) Psychological Distress Scale to measure nonspecific psychological distress in the past month.

**Results:** Among 4,933 adult MVM users and 16,670 adult non-users, MVM users self-reported 30% better overall health than non-users (Adjusted OR: 1.31; 95% CI: 1.17-1.46 FDR-adjusted  $P < .001$ ). There were no differences between MVM users and non-users in history of 10 chronic diseases, number of present health conditions, severity of current psychological distress on the K6 scale and rates of needing help with daily activities. No effect modification was observed after stratification by sex, education, and race.

1  
2  
3 **Conclusions:** MVM users self-reported better overall health despite no apparent differences in  
4 clinically measurable health outcomes. These results suggest that widespread use multivitamins  
5 in adults may be a result of individuals' positive expectation that multivitamin use leads to better  
6 health outcomes or a self-selection bias in which MVM users intrinsically harbor more positive  
7 views regarding their health.  
8  
9  
10  
11  
12  
13  
14  
15

## 16 **STRENGTHS AND LIMITATIONS OF THE STUDY**

- 17 - This is the first study to link better self-reported health, absence of clinically measurable  
18 benefits, and multivitamin and multimineral supplement use in the same population  
19
- 20 - Data are derived from a large, national survey across the US  
21
- 22 - Results have broad implications for public health and the multibillion-dollar supplement  
23 industry  
24
- 25 - Cross-sectional study design precludes the demonstration of a causal relationship  
26 between self-reported health and multivitamin and multimineral supplements  
27
- 28 - Self-reported health can be inherently biased and confounding  
29  
30  
31  
32  
33  
34  
35  
36  
37  
38  
39  
40  
41  
42  
43  
44  
45  
46  
47  
48  
49  
50  
51  
52  
53  
54  
55  
56  
57  
58  
59  
60

## INTRODUCTION

Consumption of multivitamins (MVs) and multi-minerals (MMs) (together: MVMs) as dietary supplements is widespread in the general US adult population, with some reports estimating 33% of Americans regularly take MVMs<sup>1-4</sup>. While MVM supplementation is warranted for some individuals at high-risk because of disease-related deficiency<sup>5</sup>, the consumption of non-prescription, over-the-counter MVMs has not produced robust evidence for the wide-ranging health benefits expected by the general adult population. Likewise, large randomized clinical trials that evaluate MVM at different doses, across both men and women at varied ages, have failed to demonstrate benefit in prevention of chronic diseases. The Physicians' Health Study II (PHS II), a randomized placebo-controlled clinical trial of low-dose daily MVM use in older male physicians, found no reduction in major CVD events, myocardial infarction, stroke, and CVD mortality<sup>6</sup>, and these results were independent of baseline nutritional status<sup>7</sup>. A prospective cohort study of middle-aged and elderly women also indicated no effect of MVM use for the same CVD outcomes in PHS II<sup>8</sup>. The SU.VI.MAX Study, a clinical trial of antioxidative MVMs in adults, found no effect on incidence of ischemic CVD<sup>9</sup>, and high-dose MVMs did not reduce CVD events<sup>10</sup>. Meta-analysis of these and other studies (N=18) found no improvement in CVD outcomes in the general population<sup>11</sup>. Based on these studies, the US Preventative Services Task Force does not recommend MVM use for the prevention of CVD<sup>12,13</sup>.

Data on the effect of MVM consumption on cognitive function in adults are also inconclusive. While results from PHS II found that long-term use of daily MVs did not provide cognitive benefits in men<sup>14</sup>, a meta-analysis on 10 studies concluded that MVs selectively enhanced free recall memory but no other cognitive functions<sup>15</sup>. Intriguingly, nine weeks of MVM use appears to improve multi-tasking and cognitive function during fatigue in women<sup>16</sup>.

1  
2  
3 With regard to cancer, PHS II demonstrated moderately reduced all-cancer risk in men  
4 consuming MVs<sup>17</sup> while data from the Women's Health Initiative Clinical Trials revealed no  
5 association<sup>18</sup>. Some studies even link MVM use with increased cancer risk – a prospective cohort  
6 study of Swedish women found increased breast cancer risk associated with MVM use<sup>19</sup>.  
7  
8  
9

10  
11  
12 The association of MVM use with all-cause mortality, like CVD, is null. While data from  
13 the Multiethnic Cohort Study cohort study indicated no association between MVM use and all-  
14 cause mortality,<sup>20</sup> the Cancer Prevention Study (II) reported a five percent higher rate of all-  
15 cause death among men using MVs<sup>21</sup> and The Iowa Women's Health Study identified an  
16 association between MVM use and increased total mortality risk<sup>22</sup>. A meta-analysis of these and  
17 other randomized trials (N=21) demonstrated no effect of MVM use on mortality risk<sup>23</sup>.  
18  
19  
20  
21  
22  
23  
24  
25

26 While numerous reports on MVM consumption establish the lack of broad-spectrum,  
27 clinically measurable health benefits, the determinants of widespread MVM use by the general  
28 population are not well understood. That the majority (52%) of MVM users report using MVMs  
29 in an effort to prevent disease is even more puzzling in light of the paucity of randomized and  
30 observation data showing a positive health benefit of MVMs<sup>24</sup>. Because nutritional supplements  
31 constitute a multibillion-dollar industry and can even be harmful when taken in excess<sup>25</sup>,  
32 understanding the determinants of widespread MVM use has significant medical and financial  
33 consequences. Moreover, it is unclear whether MVM users, despite not being physiologically  
34 different from non-users, simply believe they are healthier. To address this question, we utilized  
35 data from the 2012 National Health Interview Survey<sup>26</sup> (NHIS), which included a  
36 complementary and alternative (CAM) questionnaire comprising of 21,603 participants across  
37 the US.  
38  
39  
40  
41  
42  
43  
44  
45  
46  
47  
48  
49  
50  
51  
52  
53  
54  
55  
56  
57  
58  
59  
60

## METHODS

### Data source

All data was obtained from the 2012 The National Health Interview Survey (NHIS), a nationally representative health survey conducted annually among civilian and noninstitutionalized US participants by the Centers for Disease Control (CDC). All data was publicly available and did not require institutional review board approval. The 2012 NHIS was comprised of a core questionnaire on health information administered to each selected household member. A randomly selected adult in each household was administered a more detailed health survey which included questions on access to care, specific health conditions and use of CAM(2012 only). In 2012, 77.6% of households completed the survey and 79.7% of adults selected completed the detailed survey<sup>26</sup>.

### Health Status and Health Outcome Measures

We obtained data on adults (age  $\geq 18$  years) derived from the Sample Adult Component who also participated in the Adult CAM File. This file surveys use of alternative medicines and therapies including daily MVM consumption, yoga, and meditation. Consistent with previous NHIS studies<sup>27</sup>, we considered five psychological, physical, and functional health outcomes from questions in the Sample Adult Component: 1) self-rated health status (poor/fair vs. excellent/very good/good), 2) needing help with routine needs such as eating (yes or no), 3) history of ten chronic diseases (cancer, hypertension, coronary heart disease, stroke, chronic obstructive pulmonary disease, asthma, diabetes, arthritis, hepatitis, and weak/failing kidneys), 4) presence of 19 health conditions in the past 12 months (digestive, skin, and other allergy, acid reflux, hay

1  
2  
3 fever, chest cold, nausea and vomiting, sore throat, infectious disease, recurring headache,  
4  
5 memory loss, neurological problems, sprains, and abdominal, dental, muscle/bone, chronic, and  
6  
7 skin pain), and 5) Kessler 6-Item (K6) Psychological Distress Scale<sup>28</sup> score to measure  
8  
9 nonspecific psychological distress in the past month. Participants who refused to answer or did  
10  
11 not know the answers to at least one of these questions were excluded from the study.  
12  
13

14  
15 Participants were classified as MVM users or non-users from their response to the question  
16  
17 “During the past 12 months, did take multi-vitamins or multi-minerals?” in the Adult CAM File.  
18  
19 Participants who refused to answer or did not know their MVM use in the past 12 months were  
20  
21 excluded from analyses.  
22  
23

## 24 25 26 **Statistical Analysis**

27  
28 For each outcome, the relationship between MVM use in the past year and health  
29  
30 outcome was estimated using a logistic regression model adjusting for age, sex, race, region,  
31  
32 education, income, employment status, health insurance status, presence of child in household,  
33  
34 marital status, unmet medical care due to cost in the past year, and not seeing a health  
35  
36 professional in office in the past two weeks. Multinomial logistic regression was used for  
37  
38 outcomes with more than two levels (e.g., number of chronic diseases, number of diseases in the  
39  
40 past 12 months, Kessler-6 Item score). Binary logistic regression was used for outcomes with  
41  
42 two levels (self-reported health and needing help with daily routines such as eating). Standard  
43  
44 errors were estimated using weights provided by NHIS to account for the complex survey design  
45  
46 and produce nationally representative estimates. A multiple imputation strategy was used to  
47  
48 estimate income in cases of missing responses to income as recommended by the National  
49  
50 Center for Health Statistics<sup>29</sup>. All analyses were conducted using R (v3.5.1). *P* values were  
51  
52  
53  
54  
55  
56  
57  
58  
59  
60



1  
2  
3 adjusted for multiple comparisons using a Benjamini-Hochberg procedure with False Discovery  
4  
5 Rate (FDR) <0.01 deemed significant.  
6

7  
8 Stratified analyses were conducted in age- (18-44 years, 45-64 years and 65+ years),  
9  
10 race- (white and non-white), sex- (female and male), family income- (<100%, 100%-199%,  
11  
12 200%-299%, 300-399%, and 400% relative to the federal poverty level), education level- (did  
13  
14 not graduate high school, high school graduate, college graduate or higher) stratified groups to  
15  
16 assess the association between MVM use and self-reported health in sociodemographic  
17  
18 subgroups. In addition to stratified analyses, statistical interaction effects between MVM use  
19  
20 and demographic variable (age, race, sex, family income, and education) on self-reported health  
21  
22 was assessed using a multivariate regression model.  
23  
24  
25  
26  
27

## 28 **Patients and Public Involvement**

29  
30 Patients and the public were not involved in this study, including data collection, analysis and  
31  
32 interpretation.  
33  
34  
35  
36

## 37 **RESULTS**

### 38 **Study Cohort Characteristics**

39  
40 Sociodemographic differences between MVM users and non-users are presented in Table  
41  
42  
43 1. Our study included 4,933 MVM users and 16,670 non-users (Table 1). As previously reported  
44  
45 in data from the 2007-2010 and 2010-2014 National Health and Nutrition Examination Surveys  
46  
47 (NHANES)<sup>30,31</sup>, compared to non-users, MVM users were significantly older, earned more  
48  
49 income, more likely to be female, more likely to be a college graduate, more likely to be married,  
50  
51 and more likely to have health insurance. Unlike in previous studies, compared to MVM non-  
52  
53  
54  
55  
56  
57  
58  
59  
60

1  
2  
3 users, MVM users were less likely to be unemployed, have a minor child in their household, and  
4 not have an office visit for healthcare in the past two weeks (Table 1). We observed no  
5  
6 significant differences in percent of non-English speaking interviews and percent having  
7  
8 foregone medical care due to cost in the past year between MVM users and non-users (Table 1).  
9  
10

### 11 **Association between MVM usage and Health Status and Health Outcomes**

12  
13  
14 Differences in health status and health outcomes between MVM users and non-users are  
15 displayed in Table 2. Multivariate regression revealed that MVM users self-reported 30% better  
16 overall health than non-users (OR: 1.31, 95% CI: 1.17-1.46, FDR-adjusted  $P < .001$  ; Table 2).  
17  
18 Strikingly, MVM users and non-users did not differ in history of 10 chronic disease (MVM users  
19 mean 1.09 conditions, 95% CI: 1.06-1.11 vs non-users mean: 1.07, 95% CI: 1.03-1.11) number  
20 of present health conditions (MVM users mean: 2.7 conditions, 95% CI: 2.7-2.8 vs non-users  
21 mean: 2.8, 95% CI: 2.7-2.9), severity of psychological distress on the K6 scale (MVM users  
22 mean K6 score = 2.3, 95% CI: 2.3-2.4 vs non-users mean = 2.5, 95% CI: 2.4-2.6), and needing  
23 help with daily activities (OR: 0.86, 95% CI: 0.71-1.04).  
24  
25  
26  
27  
28  
29  
30  
31  
32  
33  
34  
35  
36  
37

### 38 **Stratified Analyses: Association between MVM Usage and Self-Reported Overall Health in** 39 **Sociodemographic Subgroups**

40  
41  
42 Table 3 reports the association between MVM usage and self-reported overall health in  
43 age, race, sex, income, and education-stratified subgroups (Table 3). MVM use was associated  
44 with better self-reported health in the 18-44-year (OR: 1.26, 95% CI: 1.00-1.61) and 45-64-year  
45 groups (OR: 1.30, 95% CI: 1.08-1.57) and near significant among respondents  $\geq 65$  years (OR:  
46  
47 1.20, 95% CI: 0.95-1.52, FDR  $P$  value = 0.06) (Table 3). MVM use was associated with better  
48  
49 self-reported health amongst both white (OR: 1.34, 95% CI: 1.07-1.67) and non-white (OR: 1.26;  
50  
51  
52  
53  
54  
55  
56  
57  
58  
59  
60

1  
2  
3 95% CI: 1.09-1.45) respondents (Table 3). MVM use was associated with better self-reported  
4 health in both male (OR: 1.33, 95% CI: 1.10-1.63) and female (OR: 1.22, 95% CI: 1.05-1.41)  
5 respondents (Table 3). Interestingly, MVM use was associated with better self-reported health in  
6 families with income < 100% of the federal poverty level (FPL) (OR: 1.42, 95% CI: 1.12-1.80),  
7 100%-199% FPL (OR: 1.37, 95% CI: 1.10-1.69) and 200%-299% FPL (OR: 1.32, 95% CI: 1.01-  
8 1.72) but not in families whose income was 300%-399% FPL (OR: 1.32, 95% CI: 0.88-1.98) or  
9  $\geq$ 400% FPL (OR: 1.15, 95% CI: 0.85-1.56) (Table 3). MVM use was associated with better self-  
10 reported health in all education subgroups analyzed, including respondents that did not complete  
11 high school (OR: 1.38, 95% CI: 1.06-1.81), high school graduates (OR: 1.21, 95% CI: 1.04-  
12 1.41), and college graduates (OR: 1.37, 95% CI: 1.00-1.88) (Table 3). All stratified analyses  
13 were conducted after adjusting for the potential confounding effects of age, sex, race, region,  
14 education, income, employment status, health insurance status, presence of child in household,  
15 marital status, unmet medical care due to cost in the past year, and not seeing a health  
16 professional in office in the past two weeks. The variable of stratification was not included as a  
17 covariate.

18  
19  
20  
21  
22  
23  
24  
25  
26  
27  
28  
29  
30  
31  
32  
33  
34  
35  
36  
37  
38 Statistical interaction effects between MVM use and demographic variables (age, race,  
39 family income, and education) on self-reported overall health was assessed through a  
40 multivariate regression model in Table S1. We observed no significant association between  
41 MVM use and age, MVM use and race, MVM use and family income, and MVM use and  
42 education on self-reported overall income (Table S1).  
43  
44  
45  
46  
47  
48  
49  
50  
51  
52  
53  
54  
55  
56  
57  
58  
59  
60

## DISCUSSION

This present study is the first to simultaneously analyze the association between MVM use and both self-reported health and clinical health outcomes. In this work, we found that MVM users self-report 30% better overall health than non-users despite no clinically assessed differences in health. Our finding that MVM users and non-users do not differ in various psychological, physical, and functional outcomes corroborates previous reports that MVMs do not improve overall health in the general adult population<sup>5-22</sup>. Our stratified analysis revealed that MVM use is associated with better self-reported overall health across all race, sex, and education groups, and in individuals under 65 and with family incomes below 300% FPL. The lack of association between MVM usage and self-reported health in individuals with family income greater than 300% FPL may be related to sample size and should be replicated in a follow up study. Taken together, these findings help elucidate explanations underlying widespread MVM usage despite no generalized clinical benefits.

The results here suggest two potential explanations underlying widespread MVM consumption in the absence of clinically measurable benefits: 1) MVM users believe in the efficacy of MVMs by harboring a positive expectation regarding the health benefits of MVMs and/or 2) MVM users intrinsically harbor a more positive outlook on their personal health regardless of MVM usage. A growing body of evidence suggests that positive expectation influence treatment outcomes for diseases including heart disease<sup>32-35</sup>, cancer<sup>36,37</sup>, musculoskeletal disorders<sup>38,39</sup>, injuries<sup>40,41</sup>, and obesity<sup>42-44</sup>. Under a positive expectation model, MVM users are more likely to harbor a positive expectation regarding the clinical efficacy of MVMs and thus more likely to self-report as having excellent or good overall health. In the case of MVM usage, it is interesting that the presence of positive expectation did not influence

1  
2  
3 clinically measurable health outcomes, unlike in other treatments. The effect of positive  
4 expectations in the MVM user community is made even more stronger when one considers that  
5  
6 the majority of MVM and supplements are sold to the so-called “worried-well” population<sup>45</sup> who  
7  
8 may assign greater weight to the purported health benefits of dietary supplements and alternative  
9  
10 therapies. It is possible that members of this population are more susceptible to positive  
11  
12 expectations and may thereby continue to use MVMs in the absence of clinical benefits.  
13  
14  
15

16  
17 The second mechanism, in which MVM users intrinsically harbor greater positive views  
18  
19 about their health, may be explained in part by certain combinations of sociodemographic  
20  
21 determinants that influence self-reported health. While age, sex, income, education, and location  
22  
23 of residence have been previously shown to affect self-reported health in diverse populations<sup>46–</sup>  
24  
25 <sup>48</sup>, combinations of other characteristics may also cause MVM users to harbor intrinsically more  
26  
27 positive views regarding their health in the absence of clinical differences. Further research is  
28  
29 necessary to elucidate these characteristics.  
30  
31  
32

33  
34 Our results are consistent with existing work from two studies: the first being a 2013  
35  
36 study involving 11,956 adults from the 2007-2010 NHANES that demonstrated MVM users  
37  
38 exhibit better self-reported health than non-users<sup>31</sup>, and second, a 2014 study involving 5536  
39  
40 Coast Guard and military study which found that MVM users were significantly more likely to  
41  
42 self-report their general health as excellent or good<sup>49</sup>. While informative, these previous studies  
43  
44 only focused on self-reported health as an outcome. In the present study, we considered self-  
45  
46 reported health in addition to clinically measurable health outcomes. This is an important  
47  
48 distinction in order to establish that MVM users experience better self-reported health in the  
49  
50 absence of clinically measurable health improvement. Nevertheless, it is encouraging that our  
51  
52  
53  
54  
55  
56  
57  
58  
59  
60

1  
2  
3 results are consistent across the NHANES, military and Coast Guard and NHIS study cohorts,  
4  
5 and robust to different statistical analysis methodologies.  
6

7  
8       Limitations of this study include the cross-sectional design, reliability of self-reported  
9  
10 health within NHIS, income estimation using multiple imputation, indication bias and  
11  
12 nonresponse bias. First, the cross-sectional study design prevents a demonstration of causal  
13  
14 relationship between MVM use and self-reported health. The lack of longitudinal data available  
15  
16 to assess changes in self-reported health before and after MVM supplementation prevents us  
17  
18 from differentiating the two aforementioned explanations that may contribute to widespread  
19  
20 MVM use. Second, self-reported health within the NHIS may inherently harbor reporting bias  
21  
22 and residual confounding. In addition to reporting bias and residual confounding, a self-reported  
23  
24 binary response to the question of whether one has taken MVMs in the past 12 months precludes  
25  
26 any analysis of dose-dependent effects of MVMs in our cohort. This is especially important  
27  
28 considering some vitamins and minerals have known U-shaped associations with disease in  
29  
30 which disease risk is elevated at both high and low vitamin and mineral levels<sup>50-53</sup>. Further, use  
31  
32 of both multivitamins and multiminerals were asked together as part of the same question in the  
33  
34 NHIS questionnaire. This prevented us from analyzing multivitamin and multimineral effects in  
35  
36 isolation. Moreover, different MVM preparations can differ in their nutritional composition,  
37  
38 quality, and bioavailability. Some individuals may take multiple MVMs whose constituents  
39  
40 could interact with each other. Because the brand of multivitamin being taken was not asked of  
41  
42 MVM users in NHIS, we could not identify differences in nutritional composition, quality,  
43  
44 bioavailability, and chemical interaction that may be driving the results in this study.  
45  
46  
47  
48  
49  
50

51       Third, despite being recommended by the NHIS<sup>29</sup>, the multiple imputation technique  
52  
53 used to calculate income in cases in which data was missing may generate estimation errors.  
54  
55  
56  
57  
58  
59  
60

1  
2  
3 Another limitation to the income-stratified results for self-reported overall health may stem from  
4 the inability to factor income mobility. Interestingly, it has been previously demonstrated that  
5 while high incomes are associated with longer life expectancies, accounting for income mobility  
6 reduces the gap by approximately 50%<sup>54</sup>.  
7  
8  
9  
10

11  
12 A portion of our cohort may have been prescribed MVMs, specific vitamins or specific  
13 minerals for indications including micronutrient deficiency, pregnancy, iron deficiency anemia,  
14 osteoporosis, Crohn's disease and others, thereby contributing to indication bias<sup>55-60</sup>. Previous  
15 estimates have suggested approximately 1% of physician office visits in the United States  
16 include a prescription or recommendation for MVMs<sup>61</sup>. One can imagine a scenario in which  
17 MVM users and non-users are imbalanced in the proportion of medical cases that require MVM  
18 supplementation (ie. micronutrient deficiency or pregnancy). In such a scenario, it may falsely  
19 appear that MVM use is not associated with clinical benefits. In the present study, owing to a  
20 lack of information regarding the reason for taking MVMs, we were unable to fully account for  
21 indication bias present in our cohort.  
22  
23  
24  
25  
26  
27  
28  
29  
30  
31  
32  
33  
34

35 In addition to indication bias, the NHIS, like other surveys, is known to suffer from  
36 nonresponse bias<sup>62</sup>. For example, a previous study found that the 1990-2009 NHIS population  
37 had an approximately 14% lower mortality than the general population<sup>62</sup>. Post-hoc methods to  
38 address nonresponse bias include creating sample weights based on demographic variables and  
39 selection probabilities, as was used in the present study. However, survey weighting, while a  
40 standard practice, may not fully account for nonresponse bias, especially if the survey weights do  
41 not take into account common differences between survey responders and non-responders such  
42 as smoking and alcohol use<sup>63</sup>. As a result, non-response bias may limit the generalizability of our  
43 results to the broader population.  
44  
45  
46  
47  
48  
49  
50  
51  
52  
53  
54  
55  
56  
57  
58  
59  
60

## Conclusions

Using nationally representative survey data on health outcomes, our study reveals that MVM users self-report better overall health than non-users despite not exhibiting improved health by clinically measurable standards. Furthermore, we identify specific sociodemographic subgroups of MVM users that are more prone to this behavior. The multibillion-dollar nature of the nutritional supplement industry makes understanding the determinants of widespread MVM use have significant medical and financial consequences. Our findings suggest that widespread use multivitamins in adults may be a result of individuals' positive expectation that multivitamin use leads to better health outcomes or a self-selection bias in which MVM users intrinsically harbor more positive views regarding their health.

## CONTRIBUTORS

MDP and ACC conceived and designed the study. MDP extracted data from NHANES. MDP, ACC, IP, PQD, JKW, RO, NJR, AA, AH, CCL, VO, IU, ALN, BSG, KTH, DHM, and GNN analyzed the data. MDP, ACC, KTH, and DHM wrote the manuscript. MDP, ACC, KTH, DHM, GNN, and RSC critically revised the manuscript for important intellectual content. All authors commented and approved the manuscript.

## FUNDING

ACC and PQD were supported by NIH Medical Scientist Training Program Training Grants T32GM007739 and T32GM007205 respectively.

## COMPETING INTERESTS

None declared.

## PATIENT CONSENT

None required.



## ETHICS APPROVAL

None required.

## DATA SHARING

All data used in the study is publicly available from the National Health Interview Survey.

## REFERENCES

1. Kantor ED, Rehm CD, Du M, White E, Giovannucci EL. Trends in dietary supplement use among US adults from 1999-2012. *JAMA - J Am Med Assoc.* 2016. doi:10.1001/jama.2016.14403
2. Bailey RL, Gahche JJ, Lentino C V, et al. Dietary supplement use in the United States, 2003-2006. *J Nutr.* 2011. doi:10.3945/jn.110.133025
3. Radimer K, Bindewald B, Hughes J, Ervin B, Swanson C, Picciano MF. Dietary supplement use by US adults: Data from the National Health and Nutrition Examination Survey, 1999-2000. *Am J Epidemiol.* 2004. doi:10.1093/aje/kwh207
4. Gahche J, Bailey R, Burt V, et al. Dietary supplement use among U.S. adults has increased since NHANES III (1988-1994). *NCHS Data Brief.* 2011.
5. Manson JAE, Bassuk SS. Vitamin and mineral supplements what clinicians need to know. *JAMA - J Am Med Assoc.* 2018. doi:10.1001/jama.2017.21012
6. Sesso HD, Christen WG, Bubes V, et al. Multivitamins in the prevention of cardiovascular disease in men: The physicians' health study II randomized controlled trial. *JAMA - J Am Med Assoc.* 2012. doi:10.1001/jama.2012.14805
7. Rautiainen S, Gaziano JM, Christen WG, et al. Effect of Baseline Nutritional Status on Long-term Multivitamin Use and Cardiovascular Disease Risk. *JAMA Cardiol.* 2017.

- 1  
2  
3 doi:10.1001/jamacardio.2017.0176  
4  
5  
6 8. Rautiainen S, Lee IM, Rist PM, et al. Multivitamin use and cardiovascular disease in a  
7  
8 prospective study of women. *Am J Clin Nutr.* 2015. doi:10.3945/ajcn.114.088310  
9  
10 9. Herberg S, Galan P, Preziosi P, et al. The SU.VI.MAX study: A randomized, placebo-  
11  
12 controlled trial of the health effects of antioxidant vitamins and minerals. *Arch Intern*  
13  
14 *Med.* 2004. doi:10.1001/archinte.164.21.2335  
15  
16  
17 10. Lamas GA, Boineau R, Goertz C, et al. Oral High-Dose Multivitamin and Minerals After  
18  
19 Myocardial Infarction. *Ann Intern Med.* 2013. doi:10.7326/0003-4819-159-12-  
20  
21 201312170-00004  
22  
23  
24 11. Kim J, Choi J, Kwon SY, et al. Association of multivitamin and mineral supplementation  
25  
26 and risk of cardiovascular disease: A systematic review and meta-analysis. *Circ*  
27  
28 *Cardiovasc Qual Outcomes.* 2018. doi:10.1161/CIRCOUTCOMES.117.004224  
29  
30  
31 12. Moyer VA. Vitamin, mineral, and multivitamin supplements for the primary prevention of  
32  
33 cardiovascular disease and cancer: U.S. preventive services task force recommendation  
34  
35 statement. *Ann Intern Med.* 2014. doi:10.7326/M14-0198  
36  
37  
38 13. Fortmann SP, Burda BU, Senger CA, et al. Vitamin, Mineral, and Multivitamin  
39  
40 Supplements for the Primary Prevention of Cardiovascular Disease and Cancer: A  
41  
42 Systematic Evidence Review for the U.S. Preventive Services Task Force. *Evid Rep.*  
43  
44 2013. doi:10.7326/0003-4819-159-12-201312170-00729  
45  
46  
47 14. Grodstein F, O'Brien J, Kang JH, et al. Long-term multivitamin supplementation and  
48  
49 cognitive function in men: A randomized trial. *Ann Intern Med.* 2013.  
50  
51  
52 15. Grima NA, Pase MP, MacPherson H, Pipingas A. The effects of multivitamins on  
53  
54 cognitive performance: A systematic review and meta-analysis. *J Alzheimer's Dis.* 2012.  
55  
56  
57  
58  
59

- 1  
2  
3 doi:10.3233/JAD-2011-111751  
4  
5  
6 16. Haskell CF, Robertson B, Jones E, et al. Effects of a multi-vitamin/mineral supplement on  
7  
8 cognitive function and fatigue during extended multi-tasking. *Hum Psychopharmacol*.  
9  
10 2010. doi:10.1002/hup.1144  
11  
12 17. Gaziano JM, Sesso HD, Christen WG, et al. Multivitamins in the prevention of cancer in  
13  
14 men: The physicians' health study II randomized controlled trial. *JAMA - J Am Med*  
15  
16 *Assoc*. 2012. doi:10.1001/jama.2012.14641  
17  
18 18. Neuhaus ML, Wassertheil-Smoller S, Thomson C, et al. Multivitamin use and risk of  
19  
20 cancer and cardiovascular disease in the women's health initiative cohorts. *Arch Intern*  
21  
22 *Med*. 2009. doi:10.1001/archinternmed.2008.540  
23  
24  
25 19. Larsson SC, Åkesson A, Bergkvist L, Wolk A. Multivitamin use and breast cancer  
26  
27 incidence in a prospective cohort of Swedish women. *Am J Clin Nutr*. 2010.  
28  
29 doi:10.3945/ajcn.2009.28837  
30  
31  
32 20. Park S-Y, Murphy SP, Wilkens LR, Henderson BE, Kolonel LN. Multivitamin Use and  
33  
34 the Risk of Mortality and Cancer Incidence: The Multiethnic Cohort Study. *Am J*  
35  
36 *Epidemiol*. 2011. doi:10.1093/aje/kwq447  
37  
38  
39 21. Watkins ML, Erickson JD, Thun MJ, Mulinaire J, Heath CW. Multivitamin use and  
40  
41 mortality in a large prospective study. *Am J Epidemiol*. 2000. doi:10.1093/aje/152.2.149  
42  
43  
44 22. Mursu J, Robien K, Harnack LJ, Park K, Jacobs DR. Dietary supplements and mortality  
45  
46 rate in older women: The Iowa women's health study. *Arch Intern Med*. 2011.  
47  
48 doi:10.1001/archinternmed.2011.445  
49  
50  
51 23. Macpherson H, Pipingas A, Pase MP. Multivitamin-multimineral supplementation and  
52  
53 mortality: A meta-analysis of randomized controlled trials. *Am J Clin Nutr*. 2013.  
54  
55  
56  
57  
58  
59  
60

- 1  
2  
3 doi:10.3945/ajcn.112.049304  
4  
5  
6 24. McGinnis JM, Birt DF, Brannon PM, et al. National Institutes of Health state-of-the-  
7  
8 science conference statement: Multivitamin/mineral supplements and chronic disease  
9  
10 prevention. In: *Annals of Internal Medicine*. Vol 145. American College of Physicians;  
11  
12 2006:364-371. doi:10.7326/0003-4819-145-5-200609050-00136  
13  
14  
15 25. Geller AI, Shehab N, Weidle NJ, et al. Emergency department visits for adverse events  
16  
17 related to dietary supplements. *N Engl J Med*. 2015. doi:10.1056/NEJMsa1504267  
18  
19  
20 26. 2012 NHIS Survey Description.  
21  
22 [https://ftp.cdc.gov/pub/health\\_statistics/nchs/dataset\\_documentation/NHIS/2012/srvydesc.](https://ftp.cdc.gov/pub/health_statistics/nchs/dataset_documentation/NHIS/2012/srvydesc.pdf)  
23  
24 pdf. Published 2012. Accessed April 24, 2019.  
25  
26  
27 27. Gonzales G, Przedworski J, Henning-Smith C. Comparison of health and health risk  
28  
29 factors between lesbian, gay, and bisexual adults and heterosexual adults in the United  
30  
31 States: Results from the national health interview survey. *JAMA Intern Med*. 2016.  
32  
33 doi:10.1001/jamainternmed.2016.3432  
34  
35  
36 28. Kessler RC, Barker PR, Colpe LJ, et al. Screening for serious mental illness in the general  
37  
38 population. *Arch Gen Psychiatry*. 2003. doi:10.1001/archpsyc.60.2.184  
39  
40  
41 29. Center for Health Statistics - Division of Health Interview Statistics N. *Multiple*  
42  
43 *Imputation of Family Income and Personal Earnings in the National Health Interview*  
44  
45 *Survey: Methods and Examples*; 2013. <https://www.cdc.gov/nchs/data/nhis/tecdoc13.pdf>.  
46  
47 Accessed July 8, 2019.  
48  
49  
50 30. Cowan AE, Jun S, Gahche JJ, et al. Dietary supplement use differs by socioeconomic and  
51  
52 health-related characteristics among U.S. adults, NHANES 2011–2014. *Nutrients*. 2018.  
53  
54 doi:10.3390/nu10081114  
55  
56  
57  
58  
59  
60

- 1  
2  
3 31. Bailey RL, Gahche JJ, Miller PE, Thomas PR, Dwyer JT. Why US adults use dietary  
4 supplements. *JAMA Intern Med.* 2013. doi:10.1001/jamainternmed.2013.2299  
5  
6
- 7  
8 32. Petrie KJ, Weinman J, Sharpe N, Buckley J. Role of patients' view of their illness in  
9 predicting return to work and functioning after myocardial infarction: Longitudinal study.  
10  
11 *Br Med J.* 1996. doi:10.1136/bmj.312.7040.1191  
12  
13
- 14  
15 33. Juergens MC, Seekatz B, Moosdorf RG, Petrie KJ, Rief W. Illness beliefs before cardiac  
16 surgery predict disability, quality of life, and depression 3 months later. *J Psychosom Res.*  
17  
18 2010. doi:10.1016/j.jpsychores.2009.10.004  
19  
20
- 21  
22 34. Barefoot JC, Brummett BH, Williams RB, et al. Recovery expectations and long-term  
23 prognosis of patients with coronary heart disease. *Arch Intern Med.* 2011.  
24  
25 doi:10.1001/archinternmed.2011.41  
26  
27
- 28  
29 35. Habibović M, Pedersen SS, Van Den Broek KC, Denollet J. Monitoring treatment  
30 expectations in patients with an implantable cardioverter-defibrillator using the EXPECT-  
31  
32 ICD scale. *Europace.* 2014. doi:10.1093/europace/euu006  
33  
34
- 35  
36 36. Colagiuri B, Zachariae R. Patient expectancy and post-chemotherapy nausea: A meta-  
37  
38 analysis. *Ann Behav Med.* 2010. doi:10.1007/s12160-010-9186-4  
39
- 40  
41 37. Nestoriuc Y, von Blanckenburg P, Schuricht F, et al. Is it best to expect the worst?  
42  
43 Influence of patients' side-effect expectations on endocrine treatment outcome in a 2-year  
44  
45 prospective clinical cohort study. *Ann Oncol.* 2016. doi:10.1093/annonc/mdw266  
46
- 47  
48 38. Mahomed NN, Liang MH, Cook EF, et al. The importance of patient expectations in  
49  
50 predicting functional outcomes after total joint arthroplasty. *J Rheumatol.* 2002.  
51
- 52  
53 39. Oettingen G, Mayer D. The motivating function of thinking about the future: Expectations  
54  
55 versus fantasies. *J Pers Soc Psychol.* 2002. doi:10.1037/0022-3514.83.5.1198  
56  
57  
58  
59

- 1  
2  
3 40. Booth-Kewley S, Schmied EA, Highfill-McRoy RM, Sander TC, Blivin SJ, Garland CF.  
4  
5 A prospective study of factors affecting recovery from musculoskeletal injuries. *J Occup*  
6  
7 *Rehabil.* 2014. doi:10.1007/s10926-013-9456-7  
8  
9  
10 41. Murgatroyd DF, Harris IA, Tran Y, Cameron ID. Predictors of return to work following  
11  
12 motor vehicle related orthopaedic trauma. *BMC Musculoskelet Disord.* 2016.  
13  
14 doi:10.1186/s12891-016-1019-6  
15  
16  
17 42. Oettingen G, Wadden TA. Expectation, fantasy, and weight loss: Is the impact of positive  
18  
19 thinking always positive? *Cognit Ther Res.* 1991. doi:10.1007/BF01173206  
20  
21  
22 43. Armitage CJ, Norman P, Alganem S, Conner M. Expectations Are More Predictive of  
23  
24 Behavior than Behavioral Intentions: Evidence from Two Prospective Studies. *Ann Behav*  
25  
26 *Med.* 2015. doi:10.1007/s12160-014-9653-4  
27  
28  
29 44. Crane MM, Ward DS, Lutes LD, Bowling JM, Tate DF. Theoretical and Behavioral  
30  
31 Mediators of a Weight Loss Intervention for Men. *Ann Behav Med.* 2016.  
32  
33 doi:10.1007/s12160-016-9774-z  
34  
35  
36 45. Lentjes MAH. The balance between food and dietary supplements in the general  
37  
38 population. *Proc Nutr Soc.* 2019. doi:10.1017/s0029665118002525  
39  
40  
41 46. Boerma T, Hosseinpoor AR, Verdes E, Chatterji S. A global assessment of the gender gap  
42  
43 in self-reported health with survey data from 59 countries. *BMC Public Health.* 2016.  
44  
45 doi:10.1186/s12889-016-3352-y  
46  
47  
48 47. Hosseinpoor AR, Stewart Williams J, Amin A, et al. Social determinants of self-reported  
49  
50 health in women and men: Understanding the role of gender in population health. *PLoS*  
51  
52 *One.* 2012. doi:10.1371/journal.pone.0034799  
53  
54  
55 48. Bethune R, Absher N, Obiagwu M, et al. Social determinants of self-reported health for  
56  
57  
58  
59

- 1  
2  
3 Canada's indigenous peoples: a public health approach. *Public Health*. 2018.  
4  
5  
6 49. Austin KG, McGraw SM, Lieberman HR. Multivitamin and protein supplement use is  
7  
8 associated with positive mood states and health behaviors in US military and coast guard  
9  
10 personnel. *J Clin Psychopharmacol*. 2014. doi:10.1097/JCP.000000000000193  
11  
12 50. Bleicher K, Cumming RG, Naganathan V, et al. U-shaped association between serum 25-  
13  
14 hydroxyvitamin D and fracture risk in older men: Results from the prospective population-  
15  
16 based CHAMP study. *J Bone Miner Res*. 2014. doi:10.1002/jbmr.2230  
17  
18  
19 51. Hayes DP. Adverse effects of nutritional inadequacy and excess: A hormetic model. *Am J*  
20  
21 *Clin Nutr*. 2008. doi:10.1093/ajcn/88.2.578s  
22  
23  
24 52. Calabrese EJ, Baldwin LA. U-Shaped Dose-Responses in Biology, Toxicology, and  
25  
26 Public Health. *Annu Rev Public Health*. 2001. doi:10.1146/annurev.publhealth.22.1.15  
27  
28  
29 53. Aleksova A, Beltrami AP, Belfiore R, et al. U-shaped relationship between vitamin D  
30  
31 levels and long-term outcome in large cohort of survivors of acute myocardial infarction.  
32  
33 *Int J Cardiol*. 2016. doi:10.1016/j.ijcard.2016.08.322  
34  
35  
36 54. Kreiner CT, Nielsen TH, Serena BL. Role of income mobility for the measurement of  
37  
38 inequality in life expectancy. *Proc Natl Acad Sci*. 2018. doi:10.1073/pnas.1811455115  
39  
40  
41 55. Kamangar F, Emadi A. Vitamin and mineral supplements: Do we really need them? *Int J*  
42  
43 *Prev Med*. 2012.  
44  
45 56. PrescQIPP. *The Prescribing of Vitamins and Minerals Including Vitamin B Preparations*  
46  
47 *(DROP-List) Nutrition-Support-in-Adults B107. Vitamins and Minerals (DROP-List) 2.1.*;  
48  
49 2015. <http://pathways.nice.org.uk/pathways/>. Accessed July 13, 2020.  
50  
51  
52 57. Fletcher J, Cooper SC, Ghosh S, Hewison M. The role of vitamin D in inflammatory  
53  
54 bowel disease: Mechanism to management. *Nutrients*. 2019. doi:10.3390/nu11051019  
55  
56  
57  
58  
59  
60

- 1  
2  
3 58. Alleyne M, Horne MK, Miller JL. Individualized Treatment for Iron-deficiency Anemia in  
4 Adults. *Am J Med*. 2008. doi:10.1016/j.amjmed.2008.07.012  
5  
6  
7  
8 59. Blumberg JB, Frei BB, Fulgoni VL, Weaver CM, Zeisel SH. Impact of frequency of  
9 multi-vitamin/multi-mineral supplement intake on nutritional adequacy and nutrient  
10 deficiencies in U.S. adults. *Nutrients*. 2017;9(8). doi:10.3390/nu9080849  
11  
12  
13  
14 60. Blumberg JB, Cena H, Barr SI, et al. The Use of Multivitamin/Multimineral Supplements:  
15 A Modified Delphi Consensus Panel Report. *Clin Ther*. 2018;40(4):640-657.  
16  
17  
18  
19  
20  
21  
22 61. Sobal jeffery, Muncie HL, Koch H. Prescription and recommendation of multivitamins  
23 by physicians in office based ambulatory care in the united states. *Nutr Res*. 1988.  
24  
25  
26  
27  
28  
29 62. Keyes KM, Rutherford C, Popham F, Martins SS, Gray L. How Healthy Are Survey  
30 Respondents Compared with the General Population?: Using Survey-linked Death  
31 Records to Compare Mortality Outcomes. *Epidemiology*. 2018.  
32  
33  
34  
35  
36  
37  
38 63. Gorman E, Leyland AH, McCartney G, et al. Assessing the representativeness of  
39 population-sampled health surveys through linkage to administrative data on alcohol-  
40 related outcomes. *Am J Epidemiol*. 2014. doi:10.1093/aje/kwu207  
41  
42  
43  
44

45  
46 **Table 1: Characteristics of American Adults by Multivitamin and Multimineral Supplement  
47 (MVM) Usage**

| 48<br>49<br>50<br>51<br>52<br>53<br>54<br>55<br>56<br>57<br>58<br>59<br>60 | Characteristic                | MVM non-users<br>(n = 4933 <sup>a</sup> ) | MVM users<br>(n = 16670 <sup>a</sup> ) | FDR-<br>adjusted<br>P value <sup>b</sup> |
|----------------------------------------------------------------------------|-------------------------------|-------------------------------------------|----------------------------------------|------------------------------------------|
|                                                                            | Weighted sample %             | 22.4 (21.8-23.0)                          | 77.6 (76.9-78.0)                       |                                          |
|                                                                            | Age, % (95% CI <sup>c</sup> ) |                                           |                                        |                                          |



|    |                                                    |                  |                  |        |
|----|----------------------------------------------------|------------------|------------------|--------|
| 1  |                                                    |                  |                  |        |
| 2  |                                                    |                  |                  |        |
| 3  | Mean age in years (95% CI)                         | 48.1 (47.4-48.7) | 49.7 (49.3-50.2) |        |
| 4  | 18-27 years                                        | 14.9 (13.8-16.2) | 13.1 (12.2-14.1) |        |
| 5  | 28-37 years                                        | 16.6 (15.4-18.0) | 16.9 (16.2-17.7) |        |
| 6  | 38-47 years                                        | 17.4 (16.3-18.6) | 15.3 (14.6-15.9) | <0.001 |
| 7  | 48-57 years                                        | 17.7 (16.4-19.0) | 17.6 (16.9-18.3) |        |
| 8  | 58-67 years                                        | 14.3 (13.2-15.5) | 15.4 (14.8-16.1) |        |
| 9  | 68-80 years                                        | 10.1 (9.2-11.1)  | 12.8 (12.1-13.5) |        |
| 10 | ≥ 80 years                                         | 5.9 (5.1-6.8)    | 6.2 (5.7-6.7)    |        |
| 11 | Race, % (95% CI <sup>c</sup> )                     |                  |                  |        |
| 12 | White only                                         | 82.2 (81.0-83.3) | 82.9 (82.1-83.6) |        |
| 13 | Black/African American only                        | 11.4 (10.4-12.5) | 10.4 (9.9-11.0)  |        |
| 14 | American Indian/ Alaskan Native                    | 1.1 (0.8-1.4)    | 0.6 (0.5-0.8)    | <0.001 |
| 15 | only                                               | 3.5 (3.1-4.0)    | 4.3 (3.9-4.6)    |        |
| 16 | Asian only                                         | 1.8 (1.5-2.2)    | 1.9 (1.6-2.1)    |        |
| 17 | Multiple race                                      | 54.1 (52.6-55.6) | 59.1 (58.2-60.1) | <0.001 |
| 18 | % Female (95% CI <sup>c</sup> )                    |                  |                  |        |
| 19 | Family Income, relative to federal                 |                  |                  |        |
| 20 | poverty level (95% CI <sup>c</sup> )               |                  |                  |        |
| 21 | <100%                                              | 16.9 (15.3-18.4) | 12.4 (11.5-13.3) |        |
| 22 | 100%-199%                                          | 19.7 (18.2-21.2) | 17.9 (17.1-18.8) |        |
| 23 | 200%- 299%                                         | 17.3 (15.8-18.7) | 17.0 (16.2-17.8) | <0.001 |
| 24 | 300%-399%                                          | 12.8 (11.4-14.2) | 13.4 (12.6-14.1) |        |
| 25 | 400% +                                             | 33.4 (31.1-35.6) | 39.4 (37.9-40.9) |        |
| 26 | Education status, % (95% CI <sup>c</sup> )         |                  |                  |        |
| 27 | Did not graduate high school                       | 11.7 (10.7-12.8) | 9.6 (9.0-10.1)   |        |
| 28 | Grade 12 or GED                                    | 26.6 (24.8-28.5) | 22.4 (21.4-23.4) |        |
| 29 | Some college, no degree                            | 22.1 (20.5-23.8) | 21.2 (20.1-22.4) | <0.001 |
| 30 | Associates degree                                  | 10.8 (9.7-11.9)  | 12.0 (11.4-12.6) |        |
| 31 | College graduate or higher                         | 28.7 (26.7-30.7) | 34.7 (33.3-36.2) |        |
| 32 | Relationship status, % (95% CI <sup>c</sup> )      |                  |                  |        |
| 33 | Married or living with partner                     | 49.0 (46.4-51.7) | 51.0 (49.4-52.7) |        |
| 34 | Separated, divorced, or widowed                    | 26.6 (25.0-28.3) | 26.7 (25.6-27.8) | <0.001 |
| 35 | Never married                                      | 24.3 (22.5-26.1) | 22.3 (21.0-23.5) |        |
| 36 | Employment status, % (95% CI <sup>c</sup> )        |                  |                  |        |
| 37 | Employed                                           | 58.1 (55.2-60.9) | 58.6 (56.7-60.5) |        |
| 38 | Unemployed, looking for work                       | 6.1 (5.2-7.0)    | 5.2 (4.8-5.6)    | 0.05   |
| 39 | Not in labor force                                 | 35.8 (33.7-37.9) | 36.2 (34.8-37.6) |        |
| 40 | Minor child in household, % (95% CI <sup>c</sup> ) | 30.4 (28.8-32.0) | 26.5 (25.5-27.3) | <0.001 |

|    |                                                                                          |                  |                  |        |
|----|------------------------------------------------------------------------------------------|------------------|------------------|--------|
| 1  |                                                                                          |                  |                  |        |
| 2  |                                                                                          |                  |                  |        |
| 3  | Non-English-speaking interview, %                                                        |                  |                  | 0.66   |
| 4  | (95% CI <sup>c</sup> )                                                                   | 3.6 (3.1-4.1)    | 3.5 (3.1-3.8)    |        |
| 5  | Has health insurance, % (95% CI <sup>c</sup> )                                           | 84.3 (83.1-85.4) | 87.4 (86.9-88.0) | <0.001 |
| 6  | No office visit for health care in the past                                              |                  |                  | <0.001 |
| 7  | two weeks, % (95% CI <sup>c</sup> )                                                      | 79.8 (78.6-81.0) | 76.4 (75.7-77.1) |        |
| 8  | Unmet medical care due to cost in the                                                    |                  |                  | 0.19   |
| 9  | past year, % (95% CI <sup>c</sup> )                                                      | 9.4 (8.5-10.3)   | 8.7 (8.3-9.2)    |        |
| 10 |                                                                                          |                  |                  |        |
| 11 |                                                                                          |                  |                  |        |
| 12 |                                                                                          |                  |                  |        |
| 13 |                                                                                          |                  |                  |        |
| 14 |                                                                                          |                  |                  |        |
| 15 |                                                                                          |                  |                  |        |
| 16 | a. Unweighted sample size                                                                |                  |                  |        |
| 17 |                                                                                          |                  |                  |        |
| 18 | b. FDR-adjusted P value was computed using the Benjamini-Hochberg procedure. P values    |                  |                  |        |
| 19 | were computed using a two-sample t-test or chi-square test for independence.             |                  |                  |        |
| 20 |                                                                                          |                  |                  |        |
| 21 |                                                                                          |                  |                  |        |
| 22 |                                                                                          |                  |                  |        |
| 23 | c. All confidence intervals were computed based on a Rao-Scott-scaled chi-squared        |                  |                  |        |
| 24 | distribution for the loglikelihood from a binomial distribution using the Survey package |                  |                  |        |
| 25 | in R.                                                                                    |                  |                  |        |
| 26 |                                                                                          |                  |                  |        |
| 27 |                                                                                          |                  |                  |        |
| 28 |                                                                                          |                  |                  |        |
| 29 |                                                                                          |                  |                  |        |
| 30 |                                                                                          |                  |                  |        |
| 31 |                                                                                          |                  |                  |        |
| 32 |                                                                                          |                  |                  |        |
| 33 |                                                                                          |                  |                  |        |
| 34 |                                                                                          |                  |                  |        |
| 35 |                                                                                          |                  |                  |        |
| 36 |                                                                                          |                  |                  |        |
| 37 |                                                                                          |                  |                  |        |
| 38 |                                                                                          |                  |                  |        |
| 39 |                                                                                          |                  |                  |        |
| 40 |                                                                                          |                  |                  |        |
| 41 |                                                                                          |                  |                  |        |
| 42 |                                                                                          |                  |                  |        |
| 43 |                                                                                          |                  |                  |        |
| 44 |                                                                                          |                  |                  |        |
| 45 |                                                                                          |                  |                  |        |
| 46 |                                                                                          |                  |                  |        |
| 47 |                                                                                          |                  |                  |        |
| 48 |                                                                                          |                  |                  |        |
| 49 |                                                                                          |                  |                  |        |
| 50 |                                                                                          |                  |                  |        |
| 51 |                                                                                          |                  |                  |        |
| 52 |                                                                                          |                  |                  |        |
| 53 |                                                                                          |                  |                  |        |
| 54 |                                                                                          |                  |                  |        |
| 55 |                                                                                          |                  |                  |        |
| 56 |                                                                                          |                  |                  |        |
| 57 |                                                                                          |                  |                  |        |
| 58 |                                                                                          |                  |                  |        |
| 59 |                                                                                          |                  |                  |        |
| 60 |                                                                                          |                  |                  |        |

**Table 2. Association between MVM Usage and Health Status**

| Characteristic                                                                      | MVM non-users    | MVM users        | Adjusted Effect of MVM usage, $\beta$ or OR (95% CI) <sup>a</sup> | FDR-adjusted <i>P</i> value <sup>e</sup> |
|-------------------------------------------------------------------------------------|------------------|------------------|-------------------------------------------------------------------|------------------------------------------|
| Self-rated overall health as excellent, very good or good, % (95% CI <sup>f</sup> ) | 84.9 (83.8-86.0) | 88.3 (87.7-88.9) | OR=1.3 (1.2-1.5)                                                  | <0.001                                   |
| Needs help with ADLs, % (95% CI <sup>f</sup> )                                      | 5.6 (4.8-6.3)    | 4.8 (4.4-5.2)    | OR = 0.86 (0.7-1.04)                                              | 0.07                                     |
| History of chronic conditions, % (95% CI <sup>f</sup> )                             |                  |                  |                                                                   |                                          |
| Mean number of chronic conditions                                                   | 1.07 (1.03-1.11) | 1.09 (1.06-1.11) | $\beta = 0.03$ (-0.07-0.007)                                      | 0.07                                     |
| No chronic conditions                                                               | 44.4 (42.0-46.8) | 43.0 (41.4-44.5) |                                                                   |                                          |
| 1 chronic condition                                                                 | 26.3 (24.5-28.2) | 26.4 (25.4-27.5) |                                                                   |                                          |
| Multiple chronic conditions                                                         | 28.4 (26.7-30.0) | 29.7 (28.6-30.7) |                                                                   |                                          |
| Health conditions in past year <sup>d</sup> (95% CI <sup>f</sup> )                  |                  |                  |                                                                   |                                          |
| Mean number of present conditions                                                   | 2.8 (2.7-2.9)    | 2.7 (2.7-2.8)    | $\beta=-0.06$ (-0.2-0.02)                                         | 0.08                                     |
| 0-5 present conditions                                                              | 84.7 (81.3-88.1) | 85.2 (83.0-87.6) |                                                                   |                                          |
| 6-10 present conditions                                                             | 12.7 (11.6-13.8) | 12.4 (11.7-13.0) |                                                                   |                                          |
| $\geq 10$ present conditions                                                        | 1.5 (1.1-1.9)    | 1.4 (1.2-1.6)    |                                                                   |                                          |
| Kessler 6-item score, % (95% CI <sup>f</sup> )                                      |                  |                  |                                                                   |                                          |
| Mean Kessler score                                                                  | 2.5 (2.4 -2.6)   | 2.3 (2.3-2.4)    | $\beta=-0.08$ (-0.2-0.04)                                         | 0.13                                     |
| No impairment                                                                       | 80.9 (77.4-84.4) | 82.3 (80.0-84.6) |                                                                   |                                          |
| Moderate Impairment                                                                 | 15.4 (14.2-16.6) | 14.8 (14.1-15.5) |                                                                   |                                          |
| Severe Impairment                                                                   | 3.7 (3.1-4.2)    | 2.9 (2.6-3.2)    |                                                                   |                                          |

a) Estimates were produced after adjusting for age, sex, race, region, education level, income, employment status, health insurance status, presence of child in household,

1  
2  
3 marital status, unmet medical care due to cost in the past year, and not seeing a health  
4  
5 professional in office in the past two weeks  
6

- 7  
8 b) *P* value was defined using a multivariate regression model controlling for age, sex, race,  
9  
10 region, education level, income, employment status, health insurance status, presence of  
11  
12 child in household, marital status, unmet medical care due to cost in the past year, and not  
13  
14 seeing a health professional in office in the past two weeks  
15  
16  
17 c) Ten chronic diseases included: cancer, hypertension, coronary heart disease, stroke,  
18  
19 chronic obstructive pulmonary disease, asthma, diabetes, arthritis, hepatitis, and  
20  
21 weak/failing kidneys  
22  
23  
24 d) 19 health conditions in the past 12 months included: respiratory, digestive, skin, and other  
25  
26 allergy, acid reflux, hay fever, chest cold, nausea and vomiting, sore throat, infectious  
27  
28 disease, recurring headache, memory loss, neurological problems, sprains, and  
29  
30 abdominal, dental, muscle/bone, chronic, and skin pain  
31  
32  
33 e) FDR-adjusted *P* values were computed using the Benjamini-Hochberg procedure  
34  
35  
36 f) All confidence intervals were computed based on a Rao-Scott-scaled chi-squared  
37  
38 distribution for the loglikelihood from a binomial distribution using the Survey package  
39  
40 in R.  
41  
42  
43  
44  
45  
46  
47  
48  
49  
50  
51  
52  
53  
54  
55  
56  
57  
58  
59  
60

**Table 3: Association Between MVM Usage and Self-Reported Overall Health in Sociodemographic Subgroups**

| Group                                                            | Self-rated overall health as excellent, very good or good, % (95% CI <sup>a</sup> ), MVM Non-Users | Self-rated overall health as excellent, very good or good, % (95% CI <sup>a</sup> ), MVM Users | Adjusted Effect of MVM usage on self-reported health, OR (95% CI <sup>a</sup> ) <sup>b</sup> | FDR Adjusted <i>P</i> value <sup>c</sup> |
|------------------------------------------------------------------|----------------------------------------------------------------------------------------------------|------------------------------------------------------------------------------------------------|----------------------------------------------------------------------------------------------|------------------------------------------|
| <b>Age</b>                                                       |                                                                                                    |                                                                                                |                                                                                              |                                          |
| 18-44 years                                                      | 92.3 (91.1-93.5)                                                                                   | 94.2 (93.6-94.8)                                                                               | 1.3 (1.0-1.6)                                                                                | 0.03                                     |
| 45-64 years                                                      | 79.9 (77.8-82.1)                                                                                   | 85.3 (84.2-86.4)                                                                               | 1.3 (1.1-1.6)                                                                                | 0.009                                    |
| 65+ years                                                        | 77.2 (73.8-80.5)                                                                                   | 82.0 (80.6-83.4)                                                                               | 1.2 (1.0-1.5)                                                                                | 0.06                                     |
| <b>Race</b>                                                      |                                                                                                    |                                                                                                |                                                                                              |                                          |
| White                                                            | 85.9 (84.7-87.2)                                                                                   | 89.1 (88.5-89.7)                                                                               | 1.3 (1.1-1.7)                                                                                | 0.009                                    |
| Non-white                                                        | 80.0 (77.2-82.7)                                                                                   | 84.2 (82.8-85.6)                                                                               | 1.3 (1.1-1.5)                                                                                | 0.007                                    |
| <b>Sex</b>                                                       |                                                                                                    |                                                                                                |                                                                                              |                                          |
| Female                                                           | 84.0 (82.5-85.4)                                                                                   | 88.1 (87.4-88.9)                                                                               | 1.2 (1.1-1.4)                                                                                | 0.009                                    |
| Male                                                             | 85.9 (84.2-87.7)                                                                                   | 88.4 (87.5-89.3)                                                                               | 1.3 (1.1-1.6)                                                                                | 0.009                                    |
| <b>Family Income, relative to federal poverty level (95% CI)</b> |                                                                                                    |                                                                                                |                                                                                              |                                          |
| <100%                                                            | 71.7 (68.0-75.4)                                                                                   | 75.6 (73.1-78.1)                                                                               | 1.4 (1.1-1.8)                                                                                | 0.007                                    |
| 100%-199%                                                        | 76.4 (73.6-79.2)                                                                                   | 80.7 (79.0-82.4)                                                                               | 1.4 (1.1-1.7)                                                                                | 0.007                                    |
| 200%- 299%                                                       | 84.8 (82.1-87.5)                                                                                   | 87.3 (85.9-88.6)                                                                               | 1.3 (1.0-1.7)                                                                                | 0.04                                     |
| 300%-399%                                                        | 89.6 (86.4-92.7)                                                                                   | 91.0 (89.6-92.4)                                                                               | 1.3 (0.9-2.0)                                                                                | 0.15                                     |
| 400% +                                                           | 94.8 (93.5-96.1)                                                                                   | 95.2 (94.6-95.8)                                                                               | 1.1 (0.8-1.6)                                                                                | 0.23                                     |
| <b>Education</b>                                                 |                                                                                                    |                                                                                                |                                                                                              |                                          |
| Did not graduate high school                                     | 67.2 (63.1-71.3)                                                                                   | 71.9 (69.7-74.2)                                                                               | 1.4 (1.1-1.9)                                                                                | 0.01                                     |

|    |                      |                  |                  |               |      |
|----|----------------------|------------------|------------------|---------------|------|
| 1  |                      |                  |                  |               |      |
| 2  |                      |                  |                  |               |      |
| 3  |                      | 84.1 (82.6-85.5) | 86.7 (85.9-87.4) | 1.2 (1.0-1.4) | 0.01 |
| 4  | High school graduate |                  |                  |               |      |
| 5  | College graduate or  | 93.8 (92.4-95.1) | 95.3 (94.7-95.9) | 1.4 (1.0-1.9) | 0.03 |
| 6  | higher               |                  |                  |               |      |
| 7  |                      |                  |                  |               |      |
| 8  |                      |                  |                  |               |      |
| 9  |                      |                  |                  |               |      |
| 10 |                      |                  |                  |               |      |
| 11 |                      |                  |                  |               |      |
| 12 |                      |                  |                  |               |      |
| 13 | a)                   |                  |                  |               |      |
| 14 |                      |                  |                  |               |      |
| 15 |                      |                  |                  |               |      |
| 16 |                      |                  |                  |               |      |
| 17 |                      |                  |                  |               |      |
| 18 |                      |                  |                  |               |      |
| 19 | b)                   |                  |                  |               |      |
| 20 |                      |                  |                  |               |      |
| 21 |                      |                  |                  |               |      |
| 22 |                      |                  |                  |               |      |
| 23 |                      |                  |                  |               |      |
| 24 |                      |                  |                  |               |      |
| 25 |                      |                  |                  |               |      |
| 26 |                      |                  |                  |               |      |
| 27 |                      |                  |                  |               |      |
| 28 | c)                   |                  |                  |               |      |
| 29 |                      |                  |                  |               |      |
| 30 |                      |                  |                  |               |      |
| 31 |                      |                  |                  |               |      |
| 32 |                      |                  |                  |               |      |
| 33 |                      |                  |                  |               |      |
| 34 |                      |                  |                  |               |      |
| 35 |                      |                  |                  |               |      |
| 36 |                      |                  |                  |               |      |
| 37 |                      |                  |                  |               |      |
| 38 |                      |                  |                  |               |      |
| 39 |                      |                  |                  |               |      |
| 40 |                      |                  |                  |               |      |
| 41 |                      |                  |                  |               |      |
| 42 |                      |                  |                  |               |      |
| 43 |                      |                  |                  |               |      |
| 44 |                      |                  |                  |               |      |
| 45 |                      |                  |                  |               |      |
| 46 |                      |                  |                  |               |      |
| 47 |                      |                  |                  |               |      |
| 48 |                      |                  |                  |               |      |
| 49 |                      |                  |                  |               |      |
| 50 |                      |                  |                  |               |      |
| 51 |                      |                  |                  |               |      |
| 52 |                      |                  |                  |               |      |
| 53 |                      |                  |                  |               |      |
| 54 |                      |                  |                  |               |      |
| 55 |                      |                  |                  |               |      |
| 56 |                      |                  |                  |               |      |
| 57 |                      |                  |                  |               |      |
| 58 |                      |                  |                  |               |      |
| 59 |                      |                  |                  |               |      |
| 60 |                      |                  |                  |               |      |

- a) All confidence intervals were computed based on a Rao-Scott-scaled chi-squared distribution for the loglikelihood from a binomial distribution using the Survey package in R.
- b) Estimates were produced after adjusting for age, sex, race, region, education level, income, employment status, health insurance status, presence of child in household, marital status, unmet medical care due to cost in the past year, and not seeing a health professional in office in the past two weeks.
- c) FDR-adjusted *P* values were computed using the Benjamini-Hochberg procedure. *P* value was defined using a multivariate regression model controlling for age, sex, race, region, education level, income, employment status, health insurance status, presence of child in household, marital status, unmet medical care due to cost in the past year, and not seeing a health professional in office in the past two weeks.

1  
2  
3 **Supplement for:**  
4

5 **Self-reported health without clinically measurable benefits among adult users of**  
6 **multivitamin and multimineral supplements: a cross-sectional study**  
7  
8

9  
10 Paranjpe, Chin et. al.  
11  
12  
13

14  
15 **Tables:**

16 Table S1: Interaction between demographic variable and MVM use on self-reported health  
17  
18  
19  
20  
21  
22  
23  
24  
25  
26  
27  
28  
29  
30  
31  
32  
33  
34  
35  
36  
37  
38  
39  
40  
41  
42  
43  
44  
45  
46  
47  
48  
49  
50  
51  
52  
53  
54  
55  
56  
57  
58  
59  
60

**Table S1: Interaction between demographic variable and MVM use on self-reported health**

| Demographic Variable                                                                          | MVM use:demographic variable interaction on self-reported overall health, $\beta_{\text{Interaction}}$ (95% CI) <sup>a</sup> | FDR Adjusted <i>P</i> value <sup>b</sup> |
|-----------------------------------------------------------------------------------------------|------------------------------------------------------------------------------------------------------------------------------|------------------------------------------|
| Age (18-44 years, 45-64 years, 65+ years)                                                     | 1.1 (0.9-1.2)                                                                                                                | 0.50                                     |
| Race (White or non-white)                                                                     | 1.0 (0.9-1.1)                                                                                                                | 0.50                                     |
| Sex                                                                                           | 1.0 (0.8-1.3)                                                                                                                | 0.50                                     |
| Family Income, relative to federal poverty level (<100%, 100-199%, 200-299%, 300-399%, 400%+) | 1.0 (0.9-1.1)                                                                                                                | 0.50                                     |
| Education (Did not graduate high school, high school graduate, , college graduate)            | 1.0 (1.0-1.1)                                                                                                                | 0.50                                     |

- a) Estimates were produced after adjusting for age, sex, race, region, education level, income, employment status, health insurance status, presence of child in household, marital status, unmet medical care due to cost in the past year, and not seeing a health professional in office in the past two weeks.
- b) FDR-adjusted *P* values were computed using the Benjamini-Hochberg procedure. *P* value was defined using a multivariate regression model controlling for age, sex, race, region, education level, income, employment status, health insurance status, presence of child in household, marital status, unmet medical care due to cost in the past year, and not seeing a health professional in office in the past two weeks.



STROBE Statement—Checklist of items that should be included in reports of *cross-sectional studies*

|                              | Item No | Recommendation                                                                                                                                                                                               | Page No |
|------------------------------|---------|--------------------------------------------------------------------------------------------------------------------------------------------------------------------------------------------------------------|---------|
| <b>Title and abstract</b>    | 1       | (a) Indicate the study's design with a commonly used term in the title or the abstract                                                                                                                       | 1       |
|                              |         | (b) Provide in the abstract an informative and balanced summary of what was done and what was found                                                                                                          | 2       |
| <b>Introduction</b>          |         |                                                                                                                                                                                                              |         |
| Background/rationale         | 2       | Explain the scientific background and rationale for the investigation being reported                                                                                                                         | 4-5     |
| Objectives                   | 3       | State specific objectives, including any prespecified hypotheses                                                                                                                                             | 2       |
| <b>Methods</b>               |         |                                                                                                                                                                                                              |         |
| Study design                 | 4       | Present key elements of study design early in the paper                                                                                                                                                      | 6-7     |
| Setting                      | 5       | Describe the setting, locations, and relevant dates, including periods of recruitment, exposure, follow-up, and data collection                                                                              | 6-7     |
| Participants                 | 6       | (a) Give the eligibility criteria, and the sources and methods of selection of participants                                                                                                                  | 6       |
| Variables                    | 7       | Clearly define all outcomes, exposures, predictors, potential confounders, and effect modifiers. Give diagnostic criteria, if applicable                                                                     | 6-7     |
| Data sources/<br>measurement | 8*      | For each variable of interest, give sources of data and details of methods of assessment (measurement). Describe comparability of assessment methods if there is more than one group                         | 6-7     |
| Bias                         | 9       | Describe any efforts to address potential sources of bias                                                                                                                                                    | 6-7     |
| Study size                   | 10      | Explain how the study size was arrived at                                                                                                                                                                    | 6-7     |
| Quantitative variables       | 11      | Explain how quantitative variables were handled in the analyses. If applicable, describe which groupings were chosen and why                                                                                 | 7       |
| Statistical methods          | 12      | (a) Describe all statistical methods, including those used to control for confounding                                                                                                                        | 7       |
|                              |         | (b) Describe any methods used to examine subgroups and interactions                                                                                                                                          | 7       |
|                              |         | (c) Explain how missing data were addressed                                                                                                                                                                  | 7       |
|                              |         | (d) If applicable, describe analytical methods taking account of sampling strategy                                                                                                                           | 7       |
|                              |         | (e) Describe any sensitivity analyses                                                                                                                                                                        | 7       |
| <b>Results</b>               |         |                                                                                                                                                                                                              |         |
| Participants                 | 13*     | (a) Report numbers of individuals at each stage of study—eg numbers potentially eligible, examined for eligibility, confirmed eligible, included in the study, completing follow-up, and analysed            | 8       |
|                              |         | (b) Give reasons for non-participation at each stage                                                                                                                                                         | 8       |
|                              |         | (c) Consider use of a flow diagram                                                                                                                                                                           |         |
| Descriptive data             | 14*     | (a) Give characteristics of study participants (eg demographic, clinical, social) and information on exposures and potential confounders                                                                     | 8       |
|                              |         | (b) Indicate number of participants with missing data for each variable of interest                                                                                                                          | 8       |
| Outcome data                 | 15*     | Report numbers of outcome events or summary measures                                                                                                                                                         | 8-10    |
| Main results                 | 16      | (a) Give unadjusted estimates and, if applicable, confounder-adjusted estimates and their precision (eg, 95% confidence interval). Make clear which confounders were adjusted for and why they were included | 8-10    |

1  
2  
3  
4  
5  
6  
7  
8  
9  
10  
11  
12  
13  
14  
15  
16  
17  
18  
19  
20  
21  
22  
23  
24  
25  
26  
27  
28  
29  
30  
31  
32  
33  
34  
35  
36  
37  
38  
39  
40  
41  
42  
43  
44  
45  
46  
47  
48  
49  
50  
51  
52  
53  
54  
55  
56  
57  
58  
59  
60

|                          |    |                                                                                                                                                                            |       |
|--------------------------|----|----------------------------------------------------------------------------------------------------------------------------------------------------------------------------|-------|
|                          |    | (b) Report category boundaries when continuous variables were categorized                                                                                                  | 8-10  |
|                          |    | (c) If relevant, consider translating estimates of relative risk into absolute risk for a meaningful time period                                                           |       |
| Other analyses           | 17 | Report other analyses done—eg analyses of subgroups and interactions, and sensitivity analyses                                                                             | 9-10  |
| <b>Discussion</b>        |    |                                                                                                                                                                            |       |
| Key results              | 18 | Summarise key results with reference to study objectives                                                                                                                   | 10-11 |
| Limitations              | 19 | Discuss limitations of the study, taking into account sources of potential bias or imprecision. Discuss both direction and magnitude of any potential bias                 | 12-13 |
| Interpretation           | 20 | Give a cautious overall interpretation of results considering objectives, limitations, multiplicity of analyses, results from similar studies, and other relevant evidence | 11-13 |
| Generalisability         | 21 | Discuss the generalisability (external validity) of the study results                                                                                                      | 12    |
| <b>Other information</b> |    |                                                                                                                                                                            |       |
| Funding                  | 22 | Give the source of funding and the role of the funders for the present study and, if applicable, for the original study on which the present article is based              | 14    |

\*Give information separately for exposed and unexposed groups.

**Note:** An Explanation and Elaboration article discusses each checklist item and gives methodological background and published examples of transparent reporting. The STROBE checklist is best used in conjunction with this article (freely available on the Web sites of PLoS Medicine at <http://www.plosmedicine.org/>, Annals of Internal Medicine at <http://www.annals.org/>, and Epidemiology at <http://www.epidem.com/>). Information on the STROBE Initiative is available at [www.strobe-statement.org](http://www.strobe-statement.org).
